# Supplementary material for: Age-Dependent Alterations in Semen Parameters and Human Sperm MicroRNA Profile
Source: Biomedicines. 2023 Oct 28;11(11):2923. doi: 10.3390/biomedicines11112923 (PMC10669352; doi:10.3390/biomedicines11112923)
Supplement: Supplementary file 1 [file biomedicines-11-02923-s001.zip › Tables S1-S9.xlsx]

## Sheet: Supplementary Table S1
Supplementary Table S1 - Basic semen parameters and age of the 333 men recruited at the Hospital of Aveiro (Portugal). Legend: TM, total motility; PM, progressive motility; NPM, non-progressive motility; IM, immotility; C, concentration; TOTAL_SPZ, total spermatozoa; TERATO_INDEX, teratozoospermic index).
Patient number	Age (years)	Sexual abstinence (days)	Liquefaction	Apearance	Viscosity		Motility parameters				C (x106/ml)	TOTAL_SPZ (x106)	Morphology parameters				TERATO_INDEX	Classification
						Volume (ml)	TM (%)	PM (%)	NPM (%)	IM (%)			NORMAL (%)	HEAD (%)	MIDPIECE (%)	TAIL (%)
1	45	2	COMPLETE	NORMAL	INCREASED	1.2	52	35	17	48	17	20	5	85	46	35	1.74	Normozoospermic
2	35	3	COMPLETE	NORMAL	INCREASED	1	69	45	24	31	53	53	6	86	47	34	1.77	Normozoospermic
3	39	3	COMPLETE	NORMAL	NORMAL	3.5	63	42	21	37	27	93	7	93	47	26	1.78	Normozoospermic
4	33	7	COMPLETE	NORMAL	NORMAL	4.5	74	58	16	26	129	581	7	89	38	13	1.51	Normozoospermic
5	36	2	COMPLETE	NORMAL	INCREASED	1.5	74	58	16	26	30	45	8	84	47	13	1.57	Normozoospermic
6	31	2	COMPLETE	TRANSLUCID	NORMAL	3	80	65	15	20	2	6	6	89	51	43	1.95	Non-normozoospermic
7	36	3	COMPLETE	NORMAL	NORMAL	2.5	69	55	14	31	93	233	5	90	42	23	1.63	Normozoospermic
8	42	3	COMPLETE	NORMAL	NORMAL	3	35	13	22	65	29	87	2	87	60	31	1.82	Non-normozoospermic
9	39	3	INCOMPLETE	NORMAL	NORMAL	2	18	8	10	82	2							Non-normozoospermic
10	34	3	COMPLETE	NORMAL	NORMAL	1.3	62	38	24	38	28	36	7	83	57	19	1.71	Normozoospermic
11	31	2	COMPLETE	NORMAL	INCREASED	5.5	35	16	19	65	6	33	4	93	45	22	1.67	Non-normozoospermic
12	35	3	COMPLETE	NORMAL	NORMAL	4.5	85	71	14	15	57	257	6	85	46	14	1.54	Normozoospermic
13	46	3	COMPLETE	TRANSLUCID	INCREASED	2.5					2							Non-normozoospermic
14	41	3	COMPLETE	NORMAL	NORMAL	2.5	73	44	29	27	76	190	8	81	35	26	1.54	Normozoospermic
15	39	2	COMPLETE	NORMAL	NORMAL	1.5	61	33	28	39	41	62	6	85	55	19	1.69	Normozoospermic
16	35	3	COMPLETE	NORMAL	NORMAL	2	56	40	16	44	40	80	6	88	39	27	1.64	Normozoospermic
17	36	4	COMPLETE	NORMAL	NORMAL	2.5	50	35	15	50	29	73	6	82	57	24	1.73	Normozoospermic
18	30	3	COMPLETE	TRANSLUCID	NORMAL	5	59	49	10	41	7	35	4	92	50	24	1.73	Non-normozoospermic
19	33	3	COMPLETE	NORMAL	INCREASED	9	57	39	18	43	28	252	7	91	48	22	1.73	Normozoospermic
20	34	5	COMPLETE	NORMAL	NORMAL	2	66	56	10	34	84	168	7	86	52	32	1.82	Normozoospermic
21	34	4	COMPLETE	NORMAL	NORMAL	4.5	72	50	22	28	25	113	4	93	58	33	1.92	Non-normozoospermic
22	52	2	COMPLETE	NORMAL	INCREASED	1	39	25	14	61	11	11	6	90	56	25	1.82	Non-normozoospermic
23	33	4	COMPLETE	TRANSLUCID	NORMAL	3					2							Non-normozoospermic
24	31	2	COMPLETE	NORMAL	INCREASED	4	72	53	19	28	33	132	7	84	42	16	1.53	Normozoospermic
25	42	3	COMPLETE	NORMAL	NORMAL	2	37	23	14	63	5	10	5	88	42	34	1.73	Non-normozoospermic
26	45	5	COMPLETE	NORMAL	INCREASED	3	68	50	18	32	229	687	8	85	28	20	1.45	Normozoospermic
27	43	3	COMPLETE	NORMAL	NORMAL	3.5	73	60	13	27	39	137	12	74	42	18	1.52	Normozoospermic
28	37	2	COMPLETE	NORMAL	NORMAL	3	61	41	20	39	16	48	5	91	43	19	1.61	Normozoospermic
29	33	2	COMPLETE	NORMAL	INCREASED	1.7	50	38	12	50	6	10	8	85	44	16	1.58	Non-normozoospermic
30	36	2	COMPLETE	TRANSLUCID	INCREASED	4.5					2							Non-normozoospermic
31	31	2	COMPLETE	NORMAL	NORMAL	3.5	74	58	16	26	21	74	4	91	37	16	1.5	Non-normozoospermic
32	39	2	COMPLETE	NORMAL	INCREASED	1.5	75	62	13	25	21	32	7	77	40	12	1.39	Normozoospermic
33	31	3	INCOMPLETE	NORMAL	NORMAL	3	56	38	18	44	26	78	6	82	53	33	1.79	Normozoospermic
34	33	4	COMPLETE	NORMAL	INCREASED	4	79	45	24	31	72	288	7	81	59	12	1.63	Normozoospermic
35	32	2	COMPLETE	NORMAL	NORMAL	2.5	73	58	15	27	43	108	6	87	47	15	1.59	Normozoospermic
36	38	2	COMPLETE	NORMAL	NORMAL	1.5	51	40	11	49	84	126	8	90	37	21	1.61	Normozoospermic
37	38	7	COMPLETE	NORMAL	NORMAL	0.5	46	36	10	54	33	17	4	86	40	18	1.5	Non-normozoospermic
38	29	3	COMPLETE	NORMAL	NORMAL	3.5	67	54	13	33	20	70	6	90	52	16	1.68	Normozoospermic
39	24	2	COMPLETE	TRANSLUCID	NORMAL	7	43	25	18	57	21	147	11	86	54	28	1.89	Normozoospermic
40	24	2	COMPLETE	TRANSLUCID	NORMAL	7					2							Non-normozoospermic
41	37	3	COMPLETE	TRANSLUCID	NORMAL	4	64	51	13	36	4	16	9	87	62	24	1.9	Non-normozoospermic
42	34	3	COMPLETE	NORMAL	INCREASED	5	73	55	18	27	38	190	9	81	45	18	1.58	Normozoospermic
43	37	2	COMPLETE	NORMAL	NORMAL	3	59	45	14	41	60	180	10	84	52	23	1.77	Normozoospermic
44	42	2	COMPLETE	NORMAL	NORMAL	1.5	47	33	14	53	18	27	8	90	50	18	1.72	Normozoospermic
45	49	3	COMPLETE	NORMAL	INCREASED	2	76	69	7	24	14	28	8	80	36	20	1.48	Non-normozoospermic
46	31	3	INCOMPLETE	NORMAL	NORMAL	5	58	42	16	42	51	255	5	78	62	26	1.75	Normozoospermic
47	34	3	COMPLETE	NORMAL	NORMAL	3.5	74	64	10	26	76	266	5	85	52	17	1.62	Normozoospermic
48	38	5	COMPLETE	NORMAL	NORMAL	2	63	50	13	37	55	110	4	86	62	27	1.82	Non-normozoospermic
49	35	3	COMPLETE	NORMAL	NORMAL	2.5	77	62	15	23	60	150	6	84	41	17	1.51	Normozoospermic
50	34	3	COMPLETE	NORMAL	NORMAL	2.5	65	50	15	35	40	100	6	87	36	18	1.5	Normozoospermic
51	29	3	COMPLETE	NORMAL	NORMAL	2.5	47	35	12	53	10	25	5	82	62	28	1.81	Non-normozoospermic
52	39	4	COMPLETE	NORMAL	NORMAL	2	42	29	13	58	96	192	7	82	36	18	1.46	Normozoospermic
53	28	3	COMPLETE	TRANSLUCID	NORMAL	7					2							Non-normozoospermic
54	52	3	COMPLETE	NORMAL	NORMAL	1.5	74	51	23	26	125	188	8	69	54	20	1.55	Normozoospermic
55	36	3	COMPLETE	NORMAL	NORMAL	4	58	34	23	42	4	16	2	88	64	28	1.84	Non-normozoospermic
56	35	2	COMPLETE	NORMAL	INCREASED	2.5	37	25	12	63	34	85	6	80	42	30	1.62	Non-normozoospermic
57	33	2	COMPLETE	NORMAL	INCREASED	2	61	46	15	39	82	164	8	87	52	26	1.72	Normozoospermic
58	37	3	COMPLETE	NORMAL	NORMAL	2.5	58	47	11	42	69	173	5	92	44	27	1.72	Normozoospermic
59	39	3	COMPLETE	TRANSLUCID	NORMAL	3	25	10	15	75	13	39	6	93	47	24	1.74	Non-normozoospermic
60	33	4	INCOMPLETE	NORMAL	INCREASED	3.5	29	19	10	71	4	14	4	90	50	28	1.75	Non-normozoospermic
61	38	8	COMPLETE	NORMAL	NORMAL	3.5	66	55	11	34	97	340	7	89	39	29	1.7	Normozoospermic
62	24	6	COMPLETE	NORMAL	NORMAL	4	13	9	4	87	7	28	4	94	42	38	1.81	Non-normozoospermic
63	26	3	COMPLETE	NORMAL	NORMAL	2.5	52	33	19	48	78	195	6	83	59	32	1.85	Normozoospermic
64	22	2	COMPLETE	NORMAL	NORMAL	2.2	57	47	10	43	100	220	6	94	56	28	1.89	Normozoospermic
65	31	5	COMPLETE	NORMAL	NORMAL	1.5	60	45	15	40	31	47	1	94	67	31	1.94	Non-normozoospermic
66	41	3	COMPLETE	NORMAL	NORMAL	2	46	24	22	54	12	24	5	90	63	22	1.84	Non-normozoospermic
67	28	3	COMPLETE	NORMAL	INCREASED	1.5	33	21	12	67	13	20	6	88	34	31	1.63	Non-normozoospermic
68	25	5	COMPLETE	NORMAL	NORMAL	4.5	36	26	10	64	10	45	4	90	82	36	2.17	Non-normozoospermic
69	37	3	COMPLETE	NORMAL	NORMAL	2	67	55	12	33	195	390	6	90	47	19	1.66	Normozoospermic
70	43	2	COMPLETE	NORMAL	NORMAL	6.5	45	36	9	55	4	26	5	91	49	27	1.76	Non-normozoospermic
71	29	4	COMPLETE	NORMAL	NORMAL	0.8	74	55	19	26	73	58	6	88	60	26	1.85	Normozoospermic
72	34	4	COMPLETE	NORMAL	INCREASED	2.5	36	27	9	64	40	100	9	83	51	18	1.67	Non-normozoospermic
73	41	2	COMPLETE	NORMAL	NORMAL	3.5	69	45	14	41	27	95	5	91	43	23	1.65	Normozoospermic
74	32	6	INCOMPLETE	NORMAL	INCREASED	4.5	63	46	17	37	156	702	5	90	37	25	1.6	Normozoospermic
75	36	2	COMPLETE	NORMAL	INCREASED	3.5	62	45	17	38	23	81	10	80	39	16	1.5	Normozoospermic
76	56	4	COMPLETE	TRANSLUCID	NORMAL	3.5					2							Non-normozoospermic
77	39	3	COMPLETE	NORMAL	INCREASED	4.5	60	43	17	40	26	117	5	92	53	26	1.8	Normozoospermic
78	23	7	COMPLETE	NORMAL	NORMAL	2	66	39	27	34	235	470	9	85	49	28	1.78	Normozoospermic
79	50	13	COMPLETE	TRANSLUCID	NORMAL	2	30	19	11	70	19	38	5	91	42	42	1.84	Non-normozoospermic
80	42	3	COMPLETE	NORMAL	NORMAL	7	69	46	13	41	20	140	5	90	62	32	1.94	Normozoospermic
81	26	2	COMPLETE	NORMAL	NORMAL	1.5	43	27	16	57	20	50	10	87	55	28	1.89	Normozoospermic
82	38	3	COMPLETE	NORMAL	NORMAL	5	70	48	22	30	52	260		85	69	19	1.92	Normozoospermic
83	34	2	COMPLETE	TRANSLUCID	INCREASED	2.5	21	9	12	79	3	7.5	4	94	36	30	1.67	Non-normozoospermic
84	34	2	COMPLETE	NORMAL	INCREASED	3.5	47	20	27	53	31	109	6	88	58	24	1.81	Normozoospermic
85	30	4	COMPLETE	TRANSLUCID	INCREASED	2.3	45	22	23	55	3	7	3	90	49	43	1.88	Non-normozoospermic
86	42	2	COMPLETE	NORMAL	NORMAL	1	30	13	17	70	4	4	3	90	51	44	1.91	Non-normozoospermic
87	29	2	COMPLETE	NORMAL	NORMAL	5	59	48	11	41	7	35	7	85	47	32	1.76	Non-normozoospermic
88	34	4	COMPLETE	NORMAL	INCREASED	4.5	74	56	18	26	23	104	5	91	42	26	1.67	Normozoospermic
89	35	4	COMPLETE	NORMAL	NORMAL	2.5	73	57	16	27	65	163	7	82	56	26	1.76	Normozoospermic
90	32	3	COMPLETE	NORMAL	NORMAL	2	63	49	14	37	71	142	9	83	38	20	1.55	Normozoospermic
91	39	4	COMPLETE	NORMAL	NORMAL	1	64	42	22	36	87	87	5	88	48	30	1.75	Normozoospermic
92	36	4	COMPLETE	TRANSLUCID	NORMAL	4	33	15	18	67	5	20	5	92	56	35	1.93	Non-normozoospermic
93	36	4	INCOMPLETE	TRANSLUCID	NORMAL	1.5					2							Non-normozoospermic
94	35	2	COMPLETE	NORMAL	NORMAL	2	51	34	17	49	4	8	5	87	57	26	1.79	Non-normozoospermic
95	32	3	COMPLETE	NORMAL	INCREASED	5.5	31	19	12	69	5	28	3	92	68	51	2.18	Non-normozoospermic
96	34	3	COMPLETE	NORMAL	NORMAL	2.5	70	52	18	30	79	198	8	91	40	26	1.71	Normozoospermic
97	36	2	COMPLETE	NORMAL	INCREASED	5	56	36	20	44	22	110	11	87	28	23	1.55	Normozoospermic
98	31	2	COMPLETE	NORMAL	NORMAL	4	46	38	8	54	7	28	4	88	48	34	1.77	Non-normozoospermic
99	19	8	COMPLETE	NORMAL	NORMAL	7	49	31	18	51	28	196						Normozoospermic
100	42	5	COMPLETE	NORMAL	NORMAL	5	55	47	8	45	3	15	7	88	48	29	1.77	Non-normozoospermic
101	34	3	COMPLETE	NORMAL	NORMAL	3.5	46	30	16	54	21	74	2	89	67	23	1.83	Non-normozoospermic
102	38	5	COMPLETE	NORMAL	NORMAL	4	65	52	13	35	60	240	7	82	46	27	1.67	Normozoospermic
103	30	5	COMPLETE	NORMAL	INCREASED	2	64	46	18	36	101	202	5	87	45	24	1.64	Normozoospermic
104	29	5	COMPLETE	NORMAL	NORMAL	3	60	46	14	40	19	57	3	94	61	32	1.92	Non-normozoospermic
105	35	2	COMPLETE	NORMAL	NORMAL	5	67	57	10	33	16	80	4	91	43	31	1.71	Non-normozoospermic
106	38	3	COMPLETE	NORMAL	NORMAL	2.5	59	49	10	41	91	228	8	91	48	30	1.84	Normozoospermic
107	40	4	COMPLETE	NORMAL	INCREASED	2.5	56	33	23	44	27	68	6	87	51	34	1.83	Normozoospermic
108	34	2	COMPLETE	NORMAL	NORMAL	2	73	56	17	27	75	150	10	81	39	23	1.59	Normozoospermic
109	39	4	COMPLETE	NORMAL	NORMAL	4.5	43	31	12	57	12	54	3	91	78	26	2.01	Non-normozoospermic
110	33	4	INCOMPLETE	NORMAL	INCREASED	3.5	46	29	17	54	18	64	6	86	42	30	1.68	Normozoospermic
111	41	2	COMPLETE	NORMAL	INCREASED	4	53	32	21	47	62	248	6	85	46	20	1.61	Normozoospermic
112	42	3	COMPLETE	NORMAL	INCREASED	0.5	46	33	13	54	13	7	1	98	55	33	1.88	Non-normozoospermic
113	37	2	COMPLETE	NORMAL	NORMAL	5	63	51	12	37	18	90	3	92	71	36	2.05	Non-normozoospermic
114	28	7	COMPLETE	NORMAL	INCREASED	2.5	73	52	21	27	33	83	7	86	49	25	1.72	Normozoospermic
115	35	2	COMPLETE	NORMAL	INCREASED	2	65	52	13	35	79	158	9	82	47	17	1.6	Normozoospermic
116	23	2	COMPLETE	NORMAL	NORMAL	1.2	56	40	16	44	5	6	6	80	50	36	1.77	Non-normozoospermic
117	24	4	COMPLETE	NORMAL	NORMAL	1.5	62	27	35	38	87	131	5	79	61	25	1.74	Normozoospermic
118	30	3	COMPLETE	NORMAL	NORMAL	3	44	25	19	56	8	25	6	89	54	34	1.88	Non-normozoospermic
119	37	3	COMPLETE	NORMAL	NORMAL	3.5	55	45	10	45	48	168	9	85	49	20	1.69	Normozoospermic
120	39	5	COMPLETE	TRANSLUCID	NORMAL	1.5	44	26	18	56	2	3	4	94	48	36	1.85	Non-normozoospermic
121	38	3	COMPLETE	TRANSLUCID	NORMAL	2.5	16	12	4	84	2							Non-normozoospermic
122	36	4	COMPLETE	NORMAL	NORMAL	4	46	37	9	54	19	76	4	89	63	34	1.94	Non-normozoospermic
123	49	2	COMPLETE	NORMAL	NORMAL	2	49	37	12	51	11	22	3	88	64	32	1.9	Non-normozoospermic
124	29	2	COMPLETE	NORMAL	INCREASED	5	67	54	13	33	37	185	6	90	61	23	1.85	Normozoospermic
125	33	3	COMPLETE	NORMAL	INCREASED	4.5	52	40	12	48	40	180	9	79	59	21	1.75	Normozoospermic
126	30	2	COMPLETE	NORMAL	NORMAL	2.5	70	49	21	30	39	98	4	91	61	12	1.71	Non-normozoospermic
127	41	3	COMPLETE	NORMAL	NORMAL	2.5	58	39	19	42	38	95	5	92	59	20	1.8	Normozoospermic
128	38	3	COMPLETE	TRANSLUCID	INCREASED	3.5	54	40	14	46	2	7	8	84	40	23	1.6	Non-normozoospermic
129	37	6	COMPLETE	NORMAL	INCREASED	4	38	26	12	62	11	44	2	69	73	21	1.66	Non-normozoospermic
130	23	3	COMPLETE	NORMAL	NORMAL	2	66	51	15	34	86	172	7	86	68	26	1.94	Normozoospermic
131	32	2	COMPLETE	NORMAL	INCREASED	4	60	48	12	40	44	176	6	91	46	27	1.74	Normozoospermic
132	42	6	COMPLETE	NORMAL	NORMAL	2.5	51	36	15	49	21	53	6	89	65	32	1.98	Normozoospermic
133	32	3	COMPLETE	NORMAL	NORMAL	3.5	42	30	12	58	12	42	5	88	39	20	1.55	Non-normozoospermic
134	35	4	COMPLETE	NORMAL	NORMAL	2	61	46	15	39	96	192	10	88	31	20	1.54	Normozoospermic
135	33	7	COMPLETE	NORMAL	NORMAL	7	66	49	17	34	101	707	10	81	56	21	1.75	Normozoospermic
136	40	3	COMPLETE	NORMAL	NORMAL	4.5	43	37	6	57	13	59	2	92	50	22	1.67	Non-normozoospermic
137	30	2	COMPLETE	NORMAL	NORMAL	1.5	56	47	9	44	20	30	5	94	46	9	1.57	Normozoospermic
138	29	3	COMPLETE	NORMAL	NORMAL	2	45	36	9	55	33	66	9	85	39	19	1.57	Normozoospermic
139	30	4	COMPLETE	NORMAL	NORMAL	4	68	56	12	32	88	352	8	83	40	18	1.53	Normozoospermic
140	34	4	COMPLETE	NORMAL	INCREASED	3	54	43	11	46	61	183	7	86	45	12	1.54	Normozoospermic
141	37	3	COMPLETE	NORMAL	NORMAL	2	79	68	11	21	50	100	11	87	33	12	1.48	Normozoospermic
142	37	2	COMPLETE	NORMAL	NORMAL	2.5	61	55	6	39	65	163	3	93	40	17	1.55	Non-normozoospermic
143	43	4	COMPLETE	NORMAL	INCREASED	2	56	45	11	44	46	92	5	90	40	10	1.47	Normozoospermic
144	31	2	COMPLETE	NORMAL	NORMAL	3.2	58	40	18	42	53	170	7	88	41	18	1.58	Normozoospermic
145	39	3	COMPLETE	YELLOW	NORMAL	4	57	44	13	43	53	213	10	81	48	15	1.6	Normozoospermic
146	39	2	COMPLETE	NORMAL	NORMAL	4	68	58	10	32	39	155	5	93	38	19	1.58	Normozoospermic
147	33	5	COMPLETE	NORMAL	INCREASED	3	47	37	10	53	24	71	6	75	46	25	1.55	Normozoospermic
148	31	5	COMPLETE	NORMAL	INCREASED	4	63	52	11	37	34	134	6	89	26	20	1.44	Normozoospermic
149	61	3	INCOMPLETE	NORMAL	NORMAL	0.5	72	64	8	28	309	155	5	93	34	24	1.59	Normozoospermic
150	23	2	COMPLETE	NORMAL	INCREASED	1.5	57	42	15	43	65	98	4	87	39	19	1.51	Non-normozoospermic
151	34	2	COMPLETE	NORMAL	NORMAL	1.8	71	62	9	29	51	91	7	93	39	31	1.75	Normozoospermic
152	38	2	COMPLETE	NORMAL	NORMAL	2.5	63	48	15	37	51	128	7	87	62	23	1.85	Normozoospermic
153	41	3	COMPLETE	NORMAL	NORMAL	2.5	65	44	11	45	93	231	6	92	45	22	1.62	Normozoospermic
154	29	3	INCOMPLETE	TRANSLUCID	NORMAL	4	61	51	10	39	6	23	5	90	46	19	1.64	Non-normozoospermic
155	30	6	INCOMPLETE	NORMAL	NORMAL	5	58	41	7	52	52	263	3	83	56	20	1.64	Non-normozoospermic
156	42	3	COMPLETE	NORMAL	INCREASED	4.5	72	61	11	28	55	249	9	87	36	15	1.52	Normozoospermic
157	35	3	INCOMPLETE	NORMAL	INCREASED	5	61	43	18	39	7	37	3	93	50	24	1.72	Non-normozoospermic
158	41	4	COMPLETE	NORMAL	NORMAL	2	56	47	9	44	32	64	5	91	41	20	1.6	Normozoospermic
159	28	4	COMPLETE	NORMAL	NORMAL	4	66	51	15	34	19	76	5	85	60	27	1.81	Normozoospermic
160	20	6	COMPLETE	NORMAL	NORMAL	2	54	49	5	46	30	60	1	94	58	27	1.81	Non-normozoospermic
161	40	4	COMPLETE	NORMAL	NORMAL	3	44	26	18	56	49	146	2	89	67	23	1.83	Non-normozoospermic
162	36	4	COMPLETE	NORMAL	NORMAL	4.5	42	31	11	58	11	48	5	94	60	24	1.87	Non-normozoospermic
163	29	5	COMPLETE	NORMAL	NORMAL	3.5	65	53	12	35	28	99	8	86	58	24	1.83	Normozoospermic
164	33	2	COMPLETE	YELLOW	NORMAL	5.5	63	52	11	37	86	473	4	92	44	19	1.61	Non-normozoospermic
165	39	3	COMPLETE	NORMAL	NORMAL	1.5	64	52	12	36	40	60	9	82	52	27	1.77	Normozoospermic
166	38	4	COMPLETE	NORMAL	NORMAL	3	66	44	12	44	22	65	9	84	35	23	1.56	Normozoospermic
167	33	2	COMPLETE	NORMAL	INCREASED	2	53	39	14	47	34	68	3	88	54	32	1.79	Non-normozoospermic
168	26	5	COMPLETE	NORMAL	NORMAL	4	55	33	22	45	67	268	6	86	62	20	1.78	Normozoospermic
169	36	2	COMPLETE	NORMAL	NORMAL	2.5	73	60	13	27	24	61	7	87	52	20	1.71	Normozoospermic
170	24	3	COMPLETE	NORMAL	NORMAL	7.5	62	48	14	38	44	330	5	90	52	24	1.75	Normozoospermic
171	36	3	COMPLETE	NORMAL	INCREASED	3	55	33	22	45	30	90	7	82	41	35	1.7	Normozoospermic
172	33	4	COMPLETE	NORMAL	NORMAL	3.5	63	45	18	37	51	179	5	85	65	26	1.85	Normozoospermic
173	51	4	COMPLETE	NORMAL	NORMAL	3	58	48	10	42	39	117	3	92	66	23	1.87	Non-normozoospermic
174	36	2	COMPLETE	NORMAL	INCREASED	3	50	40	10	50	31	93	7	88	45	20	1.65	Normozoospermic
175	46	6	COMPLETE	TRANSLUCID	NORMAL	3	56	43	13	44	7	21	7	87	71	32	2.04	Non-normozoospermic
176	42	5	COMPLETE	NORMAL	NORMAL	3	46	37	19	44	135	405	8	81	45	27	1.66	Normozoospermic
177	40	3	COMPLETE	NORMAL	NORMAL	2	65	54	11	35	95	190	9	80	43	18	1.55	Normozoospermic
178	40	6	COMPLETE	NORMAL	NORMAL	2.5	65	46	19	35	117	293	4	87	55	19	1.68	Non-normozoospermic
179	41	4	COMPLETE	NORMAL	INCREASED	2.5	68	37	31	32	93	233	7	78	47	17	1.53	Normozoospermic
180	37	5	COMPLETE	NORMAL	NORMAL	4	62	48	14	38	98	392	5	85	65	25	1.84	Normozoospermic
181	37	3	COMPLETE	NORMAL	NORMAL	3.5	64	41	23	36	50	175	7	87	55	19	1.73	Normozoospermic
182	52	2	COMPLETE	NORMAL	NORMAL	3.5	27	16	11	73	33	116	5	92	44	27	1.72	Non-normozoospermic
183	37	3	COMPLETE	NORMAL	INCREASED	6	41	24	17	59	63	378	14	73	37	14	1.44	Normozoospermic
184	42	3	COMPLETE	NORMAL	INCREASED	3	57	40	17	43	44	132	10	80	50	25	1.72	Normozoospermic
185	33	3	COMPLETE	NORMAL	INCREASED	3.5	31	15	16	69	21	74	5	88	57	28	1.82	Non-normozoospermic
186	35	3	COMPLETE	NORMAL	INCREASED	2	53	38	15	47	9	18	5	89	61	23	1.82	Non-normozoospermic
187	40	4	COMPLETE	NORMAL	NORMAL	2.5	72	59	13	28	78	195	5	86	51	25	1.71	Normozoospermic
188	32	4	COMPLETE	NORMAL	NORMAL	4	44	22	22	56	32	128	1	96	72	27	2.29	Non-normozoospermic
189	37	3	COMPLETE	NORMAL	NORMAL	5	60	39	21	40	90	450	6	79	47	15	1.5	Normozoospermic
190	26	2	COMPLETE	NORMAL	NORMAL	3	73	56	17	26	98	294	12	74	43	14	1.49	Normozoospermic
191	28	4	COMPLETE	NORMAL	INCREASED	0.5	21	13	8	79	6	3	6	75	64	23	1.72	Non-normozoospermic
192	42	2	INCOMPLETE	NORMAL	INCREASED	2	33	24	9	67	14	28	2	93	58	23	1.78	Non-normozoospermic
193	30	3	COMPLETE	NORMAL	INCREASED	5	51	36	15	49	80	400	5	86	40	23	1.57	Normozoospermic
194	45	2	COMPLETE	NORMAL	NORMAL	2.5	76	64	12	24	117	293	11	73	36	10	1.34	Normozoospermic
195	29	3	COMPLETE	TRANSLUCID	NORMAL	3	41	33	8	59	4	12	3	88	30	16	1.38	Non-normozoospermic
196	31	7	COMPLETE	TRANSLUCID	NORMAL	2	49	34	15	51	3	6	7	82	40	20	1.53	Non-normozoospermic
197	43	6	COMPLETE	NORMAL	INCREASED	3	55	32	23	45	39	117	6	86	40	15	1.5	Normozoospermic
198	51	3	COMPLETE	NORMAL	INCREASED	2.5	68	40	28	32	33	83	8	80	27	14	1.32	Normozoospermic
199	38	2	COMPLETE	TRANSLUCID	NORMAL	3.5					2							Non-normozoospermic
200	38	3	COMPLETE	NORMAL	INCREASED	2	21	9	12	79	8	16	3	88	58	32	1.84	Non-normozoospermic
201	47	2	COMPLETE	NORMAL	INCREASED	3	78	59	19	22	28	84	6	91	43	21	1.65	Normozoospermic
202	36	2	COMPLETE	NORMAL	NORMAL	3.5	75	60	15	25	15	53	5	93	23	16	1.36	Non-normozoospermic
203	42	3	COMPLETE	NORMAL	INCREASED	2	28	13	15	72	15	72	8	85	54	44	1.99	Non-normozoospermic
204	39	2	COMPLETE	NORMAL	NORMAL	2.5	58	40	18	42	28	70	5	94	40	30	1.73	Normozoospermic
205	32	3	COMPLETE	NORMAL	NORMAL	3.5	65	47	18	35	92	322	7	84	47	17	1.59	Normozoospermic
206	57	5	COMPLETE	NORMAL	INCREASED	3	59	36	23	41	29	87	1	97	48	33	1.8	Non-normozoospermic
207	35	4	COMPLETE	NORMAL	NORMAL	3.5	74	55	19	26	150	525	7	80	26	33	1.49	Normozoospermic
208	38	3	COMPLETE	TRANSLUCID	INCREASED	2.5	69	61	8	31	7	18	5	86	42	44	1.81	Non-normozoospermic
209	30	2	INCOMPLETE	NORMAL	INCREASED	2	53	24	29	47	65	130	4	88	51	23	1.69	Non-normozoospermic
210	25	3	COMPLETE	NORMAL	INCREASED	2	55	22	33	45	67	134	4	84	54	15	1.59	Non-normozoospermic
211	34	2	COMPLETE	NORMAL	NORMAL	1	63	47	16	37	59	59	9	81	43	20	1.58	Normozoospermic
212	21	6	COMPLETE	NORMAL	NORMAL	1.7	64	38	26	36	319	542	3	82	54	19	1.6	Non-normozoospermic
213	31	4	COMPLETE	NORMAL	NORMAL	3	49	29	20	51	39	117	9	87	64	25	1.93	Normozoospermic
214	34	2	INCOMPLETE	NORMAL	INCREASED	0.7	42	18	24	58	17	12	5	77	63	26	1.75	Non-normozoospermic
215	49	3	COMPLETE	NORMAL	NORMAL	5.5	61	49	12	39	34	187	8	80	39	19	1.5	Normozoospermic
216	35	2	COMPLETE	TRANSLUCID	NORMAL	3.5	36	25	11	64	16	56	2	90	57	24	1.74	Non-normozoospermic
217	38	4	COMPLETE	NORMAL	NORMAL	3.5	58	46	12	42	38	133	5	90	49	20	1.67	Normozoospermic
218	36	5	INCOMPLETE	NORMAL	NORMAL	2	64	50	14	36	40	80	7	83	38	28	1.6	Normozoospermic
219	34	5	COMPLETE	NORMAL	INCREASED	2.5	69	49	20	31	38	95	8	86	44	31	1.75	Normozoospermic
220	28	2	COMPLETE	TRANSLUCID	NORMAL	2.5	61	36	25	39	6	15	5	82	38	38	1.66	Non-normozoospermic
221	29	2	COMPLETE	NORMAL	INCREASED	2.5	37	26	11	63	8	20	6	92	36	34	1.72	Non-normozoospermic
222	30	5	COMPLETE	NORMAL	INCREASED	3	34	25	9	66	27	81	4	87	55	27	1.76	Non-normozoospermic
223	39	7	COMPLETE	NORMAL	INCREASED	2	73	51	22	27	110	220	8	80	36	18	1.46	Non-normozoospermic
224	29	5	COMPLETE	NORMAL	INCREASED	2	65	35	30	35	190	380	5	86	42	19	1.55	Normozoospermic
225	35	2	COMPLETE	NORMAL	INCREASED	5	63	33	30	37	19	95	3	90	44	25	1.71	Non-normozoospermic
226	27	2	COMPLETE	TRANSLUCID	NORMAL	3	63	53	10	37	7	21	9	78	45	24	1.62	Non-normozoospermic
227	23	2	COMPLETE	NORMAL	INCREASED	1	67	44	23	33	54	54	4	84	51	16	1.57	Non-normozoospermic
228	44	3	COMPLETE	NORMAL	NORMAL	2	66	40	16	44	42	84	8	80	50	23	1.66	Normozoospermic
229	36	6	COMPLETE	NORMAL	NORMAL	2.5	35	10	25	65	12	30	4	83	58	37	1.85	Non-normozoospermic
230	24	7	COMPLETE	NORMAL	NORMAL	2	66	53	13	34	87	174	6	81	56	30	1.78	Normozoospermic
231	36	4	COMPLETE	NORMAL	NORMAL	3	77	56	21	23	24	72	5	80	60	23	1.72	Normozoospermic
232	29	6	COMPLETE	NORMAL	NORMAL	4.5	53	34	19	47	30	135	3	89	50	28	1.72	Non-normozoospermic
233	53	6	COMPLETE	NORMAL	NORMAL	3	50	30	20	50	188	564	9	79	44	15	1.52	Normozoospermic
234	39	2	COMPLETE	NORMAL	NORMAL	2	71	56	15	29	35	70	8	80	37	17	1.46	Normozoospermic
235	28	3	COMPLETE	NORMAL	INCREASED	4.5	72	52	20	28	40	180	3	82	44	22	1.83	Non-normozoospermic
236	40	2	COMPLETE	NORMAL	INCREASED	3.5	58	42	16	42	57	200	6	87	42	20	1.59	Normozoospermic
237	43	5	COMPLETE	NORMAL	NORMAL	0.5	73	64	9	27	54	27	4	93	41	21	1.61	Non-normozoospermic
238	41	8	COMPLETE	NORMAL	NORMAL	1.2	65	36	29	35	149	179	8	85	32	18	1.47	Normozoospermic
239	21	6	COMPLETE	NORMAL	NORMAL	2	68	52	15	31	52	104	5	78	43	16	1.44	Normozoospermic
240	34	3	COMPLETE	NORMAL	NORMAL	3	74	56	18	26	60	180	6	77	51	14	1.51	Normozoospermic
241	51	6	COMPLETE	NORMAL	INCREASED	3.5	42	25	17	58	30	105	3	94	57	39	1.96	Non-normozoospermic
242	50	6	COMPLETE	NORMAL	INCREASED	4	54	44	10	46	23	92	6	75	42	23	1.49	Normozoospermic
243	40	5	COMPLETE	TRANSLUCID	NORMAL	5.5	70	60	10	30	4	22	4	89	51	27	1.74	Non-normozoospermic
244	37	3	COMPLETE	NORMAL	INCREASED	4.5	42	23	19	58	59	266	3	91	60	28	1.85	Non-normozoospermic
245	37	2	COMPLETE	NORMAL	NORMAL	2	72	61	11	28	96	192	5	79	57	23	1.67	Normozoospermic
246	37	3	COMPLETE	NORMAL	NORMAL	2	38	32	6	62	22	44	2	94	49	24	1.7	Non-normozoospermic
247	38	2	COMPLETE	NORMAL	NORMAL	0.5					2							Non-normozoospermic
248	37	3	COMPLETE	NORMAL	INCREASED	5.5	49	27	22	51	4	22	2	92	68	36	2	Non-normozoospermic
249	43	2	COMPLETE	NORMAL	INCREASED	2.5	43	34	9	57	12	30	6	84	35	25	1.53	Non-normozoospermic
250	36	2	COMPLETE	NORMAL	INCREASED	1.2					2							Non-normozoospermic
251	29	5	COMPLETE	NORMAL	NORMAL	4.5	57	40	17	43	37	167	6	79	52	20	1.61	Normozoospermic
252	28	2	COMPLETE	NORMAL	NORMAL	2.5	68	55	13	32	41	103	6	79	39	20	1.47	Normozoospermic
253	33	3	COMPLETE	NORMAL	NORMAL	4.5	71	56	15	29	63	284	7	86	55	29	1.8	Normozoospermic
254	35	7	COMPLETE	NORMAL	NORMAL	2	54	39	15	46	99	198	8	88	46	25	1.73	Normozoospermic
255	35	3	COMPLETE	TRANSLUCID	NORMAL	5	45	31	14	55	2							Non-normozoospermic
256	36	2	COMPLETE	NORMAL	INCREASED	2	52	4	48	48	22	44	5	81	61	25	1.76	Normozoospermic
257	28	4	COMPLETE	NORMAL	NORMAL	2.5	73	65	8	27	56	140	7	87	55	35	1.9	Normozoospermic
258	37	7	COMPLETE	NORMAL	NORMAL	4.7	74	70	4	26	23	104	8	81	49	13	1.55	Normozoospermic
259	46	3	COMPLETE	NORMAL	NORMAL	1	69	42	27	31	17	17	4	91	59	31	1.89	Non-normozoospermic
260	44	4	COMPLETE	NORMAL	INCREASED	2.5					2							Non-normozoospermic
261	34	4	COMPLETE	NORMAL	NORMAL	2.5	50	35	15	50	81	203	7	79	50	28	1.69	Normozoospermic
262	28	3	COMPLETE	NORMAL	INCREASED	2.5	61	54	7	39	3	8	4	86	62	28	1.83	Non-normozoospermic
263	36	3	COMPLETE	NORMAL	NORMAL	2.2	69	61	8	31	9	20	7	79	45	13	1.47	Non-normozoospermic
264	38	2	COMPLETE	TRANSLUCID	INCREASED	4.5	45	20	25	55	2	9	5	82	40	35	1.65	Non-normozoospermic
265	41	5	COMPLETE	NORMAL	NORMAL	2	42	27	15	58	50	100	3	89	60	58	2.13	Non-normozoospermic
266	43	5	COMPLETE	NORMAL	INCREASED	0.5	32	21	11	68	14	7	2	90	52	30	1.76	Non-normozoospermic
267	38	6	COMPLETE	TRANSLUCID	NORMAL	8.5	68	56	12	32	5	43	2	82	54	28	1.67	Non-normozoospermic
268	33	4	COMPLETE	NORMAL	NORMAL	2	67	51	16	33	74	148	8	79	41	24	1.57	Normozoospermic
269	38	3	COMPLETE	NORMAL	INCREASED	3	68	40	28	32	158	474	7	73	47	14	1.44	Normozoospermic
270	34	4	COMPLETE	NORMAL	NORMAL	5	75	60	15	25	58	290	4	82	51	18	1.57	Non-normozoospermic
271	37	2	COMPLETE	NORMAL	INCREASED	3	73	55	18	27	32	96	5	85	50	24	1.67	Normozoospermic
272	32	2	COMPLETE	TRANSLUCID	NORMAL	3.5	44	22	22	56	3	11						Non-normozoospermic
273	42	3	COMPLETE	NORMAL	INCREASED	1	60	46	14	40	23	23	6	84	48	19	1.61	Normozoospermic
274	38	4	COMPLETE	NORMAL	NORMAL	3	60	48	12	40	64	192	5	88	36	19	1.51	Normozoospermic
275	38	5	COMPLETE	NORMAL	NORMAL	2	46	37	9	54	31	62	5	86	50	21	1.65	Normozoospermic
276	45	2	COMPLETE	NORMAL	NORMAL	2	60	43	17	40	50	100	10	81	44	18	1.59	Normozoospermic
277	31	3	COMPLETE	NORMAL	NORMAL	3	53	33	20	47	17	51	4	91	48	30	1.76	Non-normozoospermic
278	18	4	COMPLETE	NORMAL	NORMAL	1.7	55	37	18	45	25	43	4	91	50	27	1.81	Non-normozoospermic
279	27	4	COMPLETE	NORMAL	NORMAL	2	44	34	10	66	20	40	3	91	54	38	1.89	Non-normozoospermic
280	27	3	COMPLETE	NORMAL	NORMAL	1	53	37	16	47	115	115	11	79	49	43	1.96	Normozoospermic
281	44	3	COMPLETE	NORMAL	NORMAL	2	70	54	16	30	36	72	6	86	58	23	1.78	Normozoospermic
282	42	5	COMPLETE	NORMAL	NORMAL	2.2	67	46	21	33	90	198	7	88	44	35	1.85	Normozoospermic
283	39	6	COMPLETE	TRANSLUCID	NORMAL	2.5	32	10	22	68	4	10	2	90	67	60	2.22	Non-normozoospermic
284	35	4	COMPLETE	NORMAL	NORMAL	4.5	64	43	21	36	75	338	8	77	51	22	1.63	Normozoospermic
285	43	2	COMPLETE	NORMAL	INCREASED	1	71	58	13	29	115	115	3	78	64	21	1.68	Non-normozoospermic
286	35	4	COMPLETE	NORMAL	INCREASED	3	69	51	18	31	97	291	6	83	52	25	1.7	Normozoospermic
287	39	3	COMPLETE	NORMAL	INCREASED	3.5	59	40	19	41	34	119	6	88	54	28	1.81	Normozoospermic
288	41	5	COMPLETE	NORMAL	NORMAL	4	62	48	14	38	18	72	4	85	68	27	1.88	Non-normozoospermic
289	35	2	COMPLETE	NORMAL	NORMAL	5	43	28	15	57	52	260	6	79	47	25	1.61	Normozoospermic
290	38	3	COMPLETE	NORMAL	NORMAL	2	52	31	21	48	63	126	5	85	44	17	1.54	Normozoospermic
291	45	2	COMPLETE	NORMAL	INCREASED	2.5	50	38	12	50	51	128	6	82	49	22	1.63	Normozoospermic
292	32	2	COMPLETE	NORMAL	INCREASED	3.5	65	47	18	35	30	105	7	85	33	24	1.53	Normozoospermic
293	46	7	COMPLETE	YELLOW	NORMAL	2.5	49	30	19	52	146	365	7	70	48	15	1.43	Normozoospermic
294	31	6	COMPLETE	NORMAL	INCREASED	5	51	42	9	49	24	120	5	78	58	21	1.65	Normozoospermic
295	44	4	COMPLETE	TRANSLUCID	NORMAL	2	52	39	13	48	11	22	1	97	70	20	1.89	Non-normozoospermic
296	33	4	COMPLETE	TRANSLUCID	NORMAL	6	51	31	20	49	5	30	1	91	76	30	1.99	Non-normozoospermic
297	39	3	COMPLETE	NORMAL	INCREASED	1.5	51	37	14	49	145	218	6	75	65	29	1.8	Normozoospermic
298	40	3	COMPLETE	NORMAL	INCREASED	2.5					2							Non-normozoospermic
299	42	2	COMPLETE	NORMAL	NORMAL	2	61	56	5	39	8	16	6	86	50	21	1.67	Non-normozoospermic
300	29	2	COMPLETE	NORMAL	INCREASED	3.5	66	49	17	34	110	385	6	85	40	15	1.49	Normozoospermic
301	35	2	COMPLETE	NORMAL	INCREASED	2	70	59	11	30	110	220	7	78	45	19	1.53	Normozoospermic
302	32	2	COMPLETE	NORMAL	NORMAL	4.5	54	41	13	46	30	135	3	89	58	23	1.75	Non-normozoospermic
303	30	4	COMPLETE	NORMAL	NORMAL	1.5	46	24	22	54	17	26	3	78	61	32	1.76	Non-normozoospermic
304	36	2	COMPLETE	NORMAL	NORMAL	2	57	40	17	43	50	100	5	77	48	17	1.49	Normozoospermic
305	42	3	COMPLETE	NORMAL	NORMAL	6	68	57	11	32	31	186	5	77	51	21	1.57	Normozoospermic
306	32	5	COMPLETE	NORMAL	NORMAL	2	28	12	16	72	59	118	3	91	49	34	1.79	Non-normozoospermic
307	36	5	COMPLETE	NORMAL	INCREASED	1.5	51	31	20	49	211	317	2	92	62	27	1.85	Non-normozoospermic
308	29	3	COMPLETE	NORMAL	NORMAL	2.5	58	44	14	42	20	60	5	84	52	26	1.71	Normozoospermic
309	34	3	COMPLETE	NORMAL	NORMAL	4.5	70	55	15	30	25	113	7	82	50	20	1.63	Normozoospermic
310	35	4	COMPLETE	NORMAL	INCREASED	3	60	52	8	40	132	396	7	69	46	8	1.26	Normozoospermic
311	36	5	COMPLETE	NORMAL	NORMAL	1.4	55	47	8	45	185	259	5	75	36	39	1.58	Normozoospermic
312	32	4	COMPLETE	NORMAL	NORMAL	6.5	61	52	9	39	60	390	5	85	55	16	1.64	Normozoospermic
313	30	3	COMPLETE	NORMAL	INCREASED	4.5	53	39	14	47	8	36	10	82	41	14	1.52	Non-normozoospermic
314	45	6	COMPLETE	NORMAL	NORMAL	5.5	50	41	9	50	73	401	5	84	63	21	1.77	Normozoospermic
315	41	3	COMPLETE	NORMAL	INCREASED	3	67	63	4	33	109	327	5	85	42	21	1.56	Normozoospermic
316	41	3	COMPLETE	TRANSLUCID	NORMAL	3	63	50	13	37	4	12	7	88	45	23	1.68	Non-normozoospermic
317	47	3	COMPLETE	NORMAL	INCREASED	2.5	50	37	13	50	60	150	8	81	47	16	1.57	Normozoospermic
318	37	5	COMPLETE	NORMAL	NORMAL	3	48	35	13	52	63	189	3	79	75	32	1.92	Non-normozoospermic
319	30	3	COMPLETE	NORMAL	INCREASED	2.5	48	33	15	52	153	383	6	83	45	16	1.53	Normozoospermic
320	39	5	COMPLETE	NORMAL	NORMAL	2.5	49	38	11	51	64	160	7	76	47	22	1.56	Normozoospermic
321	31	5	COMPLETE	NORMAL	NORMAL	5	65	49	16	35	83	415	8	79	51	26	1.7	Normozoospermic
322	38	7	COMPLETE	NORMAL	NORMAL	3.5	53	31	22	47	38	133	4	90	51	22	1.7	Non-normozoospermic
323	39	5	COMPLETE	NORMAL	NORMAL	2.5	69	58	11	31	35	88	8	86	46	17	1.62	Normozoospermic
324	31	4	COMPLETE	NORMAL	INCREASED	2	67	52	15	33	67	134	6	84	39	13	1.45	Normozoospermic
325	46	2	INCOMPLETE	NORMAL	NORMAL	1.5	38	22	16	62	13	20	4	85	62	17	1.71	Non-normozoospermic
326	37	4	COMPLETE	NORMAL	NORMAL	3.5	44	34	10	56	12	42	2	94	71	30	1.99	Non-normozoospermic
327	33	4	COMPLETE	NORMAL	INCREASED	2	51	20	31	49	25	50	5	89	65	22	1.88	Normozoospermic
328	35	2	COMPLETE	NORMAL	NORMAL	5.5	44	33	11	56	16	88	5	88	51	18	1.65	Normozoospermic
329	41	2	COMPLETE	NORMAL	NORMAL	2.5	78	43	25	32	116	290	2	96	62	23	1.85	Non-normozoospermic
330	34	5	COMPLETE	NORMAL	INCREASED	7	69	49	20	31	4	28	5	85	52	28	1.74	Non-normozoospermic
331	35	5	COMPLETE	NORMAL	NORMAL	3.5	60	44	16	40	46	161	9	75	33	22	1.43	Normozoospermic
332	37	3	COMPLETE	NORMAL	NORMAL	2.5	71	48	23	29	53	133	6	85	60	17	1.72	Normozoospermic
333	32	2	COMPLETE	NORMAL	INCREASED	4	66	46	20	34	18	72	3	95	65	30	1.96	Non-normozoospermic

## Sheet: Supplementary Table S2
Supplementary Table S2 - Descriptive statistics (mean ± standard deviation) and differences between age groups used for RNA-seq analysis. Difference is significant at the 0.05 level (red). All samples used has complete liquefacton, normal appearance and viscosity. Legend: TM, total motility; PM, progressive motility; NPM, non-progressive motility; IM, immotility, TZI, teratozoospermic index.
Variable	≤ 30 years (n=4, patient 78, 99, 103 and 114)	31-35 years (n=4, patient 4, 47, 89 and 108)	36-40 years (n=4, patient 36, 43, 69 and 119)	> 40 years (n=4, patient 26, 27, 54 and 80)	≤ 30 VS 31-35 years	≤ 30 vs 36-40 years	≤ 30 vs > 40 years	31-35 vs 36-40 years	31-35 vs > 40 years	36-40 vs > 40 years
	mean ± standard deviation				p-value
Age (years)	25.00 ± 4.97	34.00 ± 0.82	37.25 ± 0.5	45.50 ± 4.51	0.15	0.15	0.15	0.15	0.15	0.15
Volume (mL)	3.38 ± 2.43	3.13 ± 1.11	2.50 ± 0.91	3.75 ± 2.33	1.00	1.00	1.00	1.00	1.00	1.00
TM (%)	63.00 ± 10.10	73.5 ± 0.58	58.00 ± 6.83	71.00 ± 2.94	0.21	0.69	0.44	0.17	0.58	0.17
PM (%)	42.00 ± 9.06	58.75 ± 3.59	46.25 ± 6.29	51.75 ± 5.91	0.17	0.77	0.77	0.17	0.77	0.77
NPM (%)	21.00 ± 4.24	14.75 ± 3.20	11.75 ± 1.71	16.75 ± 4.79	0.17	0.17	0.73	0.73	0.73	0.44
IM (%)	37.00 ± 10.10	26.50 ± 0.58	42.00 ± 6.83	31.50 ± 6.86	0.27	0.86	0.86	0.17	0.86	0.33
Concentration (x 10^6/mL)	99.25 ± 96.43	86.25 ± 28.93	96.75 ± 67.19	103.25 ± 95.47	1.00	1.00	1.00	1.00	1.00	1.00
Total spermatozoa (x 10^6)	237.80 ± 164.22	290.00 ± 200.82	216.00 ± 118.29	288.00 ± 267.02	1.00	1.00	1.00	1.00	1.00	1.00
Normal spermatozoa (%)	7.00 ± 2.00	7.25 ± 2.06	8.25 ± 1.71	8.25 ± 2.87	1.00	1.00	1.00	1.00	1.00	1.00
Head deffects (%)	86.00 ± 1.00	84.25 ± 3.59	87.25 ± 3.20	79.50 ± 9.68	1.00	1.00	1.00	1.00	1.00	1.00
Midpiece deffects (%)	47.67 ± 2.31	46.25 ± 9.11	46.25 ± 6.50	46.5 ± 14.82	1.00	1.00	1.00	1.00	1.00	1.00
Tail deffects (%)	22.67 ± 2.08	19.75 ± 5.85	20.75 ± 1.71	22.50 ± 6.40	1.00	0.34	1.00	1.00	1.00	1.00
TZI	1.71 ± 0.07	1.62	1.68	1.62	1.00	1.00	1.00	1.00	1.00	1.00

## Sheet: Supplementary Table S3
Supplementary Table S3 - Percentage of reads mapped to small RNA types and those that remained unaligned.
Samples ID	Patient number	Age	# Total reads	% miRNA	% mRNA	% smallRNA	% hairpin	% Unmapped
G1-1	78	23	12211921	3.36	12.96	27.99	2.90	52.79
G1-3	99	19	7419344	10.46	16.33	40.64	1.24	31.33
G1-4	103	30	8987036	5.03	15.98	37.65	6.97	34.37
G1-7	114	28	8903710	19.16	26.70	22.19	0.63	31.32
G2-1B	4	33	9938260	9.07	17.83	35.51	5.21	32.39
G2-2	108	34	11516517	4.92	20.59	42.93	3.37	28.19
G2-4B	89	35	9872004	8.83	16.89	44.06	2.48	27.74
G2-6	47	34	13662869	6.86	19.50	38.83	2.86	31.95
G3-1	119	37	9302398	8.23	13.38	40.81	3.16	34.43
G3-4	43	37	11257637	13.96	15.13	40.80	3.11	27.00
G3-5	36	38	5303558	10.46	11.31	55.96	2.08	20.19
G3-6	69	37	6339102	7.73	15.01	43.24	3.27	30.75
G4-2	27	43	13621087	5.26	16.10	32.26	2.92	43.46
G4-4	26	45	4958332	7.67	14.56	47.13	3.05	27.58
G4-7	80	42	5589638	6.00	23.83	35.89	1.09	33.19
G4-8	54	52	10835274	8.58	15.69	38.82	3.73	33.19

## Sheet: Supplementary Table S4
Supplementary Table S4 - List of 374 miRNAs with 10 or more reads, identified in at least 4 samples and the number of reads in each sample.
miRNA	G1-1_trim	G1-3_trim	G1-4_trim	G1-7_trim	G2-1B_trim	G2-2_trim	G2-4B_trim	G2-6_trim	G3-1_trim	G3-4_trim	G3-5_trim	G3-6_trim	G4-2_trim	G4-4_trim	G4-7_trim	G4-8_trim
hsa-let-7a-3p	15	58	15	114	73	25	55	89	59	109	63	38	42	30	12	195
hsa-let-7a-5p	707	581	1105	724	1448	932	909	2348	660	1516	782	614	1588	702	237	2595
hsa-let-7b-3p	4	29	10	60	49	54	31	40	90	144	19	6	16	3	12	24
hsa-let-7b-5p	124	213	34	296	208	84	130	60	195	490	69	40	144	17	48	312
hsa-let-7c-5p	37	47	28	99	44	34	53	62	40	142	25	9	47	19	10	76
hsa-let-7d-5p	25	30	26	58	37	27	30	46	33	69	30	10	57	11	13	59
hsa-let-7e-5p	31	19	62	33	58	33	76	88	28	83	23	11	43	20	7	127
hsa-let-7f-5p	190	147	221	276	408	236	298	487	210	465	180	152	509	113	102	728
hsa-let-7g-5p	356	338	408	491	725	339	494	892	412	713	329	339	759	330	187	1156
hsa-let-7i-5p	63	46	99	119	63	63	54	133	105	188	67	32	286	65	71	252
hsa-miR-1-3p	9	18	37	20	48	15	24	80	13	16	1	13	30	18	11	52
hsa-miR-100-5p	679	1451	1926	1271	1380	2167	1913	4649	829	3497	2153	2640	1358	1132	495	2007
hsa-miR-101-3p	356	1095	558	1226	973	488	1271	1604	535	1574	1068	910	727	619	349	2386
hsa-miR-103a-3p	62	67	158	53	229	212	171	583	109	320	76	98	231	192	58	443
hsa-miR-103b	128	105	278	197	260	179	248	491	194	534	155	103	282	195	114	480
hsa-miR-106a-5p	11	18	1	34	9	1	14	1	9	38	1	3	7	3	0	35
hsa-miR-106b-3p	19	15	36	43	46	43	81	91	34	58	23	16	63	18	11	80
hsa-miR-106b-5p	105	184	204	144	229	186	272	379	110	335	158	180	206	153	97	641
hsa-miR-10a-3p	9	14	13	39	24	17	42	27	25	79	30	11	50	8	19	21
hsa-miR-10a-5p	1378	1831	2601	1807	3129	2360	2052	5821	1599	4460	3458	2743	4805	2465	1007	4178
hsa-miR-10b-3p	11	20	8	26	11	24	32	10	24	37	12	4	18	3	9	25
hsa-miR-10b-5p	935	1293	1428	1944	2165	1154	2122	1928	1355	4234	1421	2045	1391	1387	441	2029
hsa-miR-1182	8	0	1	13	11	17	17	2	5	4	0	5	9	0	0	4
hsa-miR-1207-5p	21	4	16	0	39	9	28	10	6	3	8	18	11	17	4	43
hsa-miR-12135	27	16	21	105	98	26	75	44	6	148	26	23	108	6	21	47
hsa-miR-12136	496	134	1035	110	774	319	377	982	194	710	273	324	672	148	145	1671
hsa-miR-122b-3p	701	744	945	564	1584	886	754	2039	723	1872	643	578	913	1185	96	3093
hsa-miR-122b-5p	23	46	16	33	44	20	20	77	14	92	31	9	31	25	7	38
hsa-miR-1233-3p	0	7	30	27	12	15	7	8	7	3	3	1	10	1	21	6
hsa-miR-124-3p	14	33	44	16	23	38	34	42	2	25	23	22	34	3	4	32
hsa-miR-1246	11018	107472	1058	7833	10343	61001	550	26334	3483	1810	4347	343	2966	1230	17325	1591
hsa-miR-125a-5p	56	29	76	66	99	98	121	493	143	315	48	91	107	50	44	204
hsa-miR-125b-2-3p	17	49	30	202	87	98	93	91	103	239	45	18	56	23	14	58
hsa-miR-125b-5p	120	95	219	218	252	389	227	498	327	765	205	301	204	115	108	339
hsa-miR-126-3p	35	78	67	56	66	66	59	149	47	171	54	53	83	43	37	134
hsa-miR-126-5p	8	38	9	15	17	12	3	15	15	62	12	13	21	13	11	42
hsa-miR-1260a	41	41	93	19	49	62	56	296	33	161	22	69	142	23	47	96
hsa-miR-1260b	53	93	104	175	92	126	103	457	106	324	93	95	379	62	21	149
hsa-miR-1261	74	144	45	60	73	324	109	28	92	227	167	16	143	46	21	34
hsa-miR-1271-5p	2	5	11	77	12	8	28	7	0	11	4	6	5	5	9	5
hsa-miR-1273h-5p	9	13	3	4	5	17	9	14	6	7	0	5	15	0	1	5
hsa-miR-128-3p	38	64	88	77	113	95	134	254	53	175	49	52	122	90	54	259
hsa-miR-1283	13	10	16	16	15	7	12	47	6	46	15	10	15	16	1	18
hsa-miR-1290	34	47	7	169	4	35	24	20	8	33	7	2	3	4	50	72
hsa-miR-1304-3p	10	11	10	1	24	0	17	10	7	18	0	16	16	2	0	32
hsa-miR-130a-3p	6	9	2	14	7	16	15	15	20	27	24	11	6	7	0	13
hsa-miR-130b-3p	8	24	6	9	4	16	12	27	9	25	6	10	3	10	7	51
hsa-miR-130b-5p	8	9	17	1	19	21	2	53	7	70	4	17	19	21	5	59
hsa-miR-132-3p	61	249	225	130	319	367	290	429	105	712	137	135	246	256	103	471
hsa-miR-132-5p	107	280	183	127	288	218	267	604	139	438	247	203	225	168	80	349
hsa-miR-1323	42	62	109	54	94	112	94	253	54	190	86	48	119	75	18	224
hsa-miR-135a-2-3p	22	39	38	8	57	20	17	40	30	85	21	11	53	21	4	85
hsa-miR-135a-5p	335	1257	569	1116	1108	623	915	1529	637	3063	895	611	871	560	182	960
hsa-miR-135b-5p	27	72	43	45	34	48	57	99	32	246	82	45	65	26	26	119
hsa-miR-139-5p	8	13	16	2	16	29	9	61	2	56	22	20	23	37	12	74
hsa-miR-140-3p	495	949	885	841	1146	887	1238	1620	601	1979	851	708	989	591	342	1505
hsa-miR-140-5p	32	22	40	13	36	61	29	56	20	90	26	22	55	7	16	52
hsa-miR-141-3p	31	135	8	292	64	21	81	18	99	203	19	12	32	8	24	32
hsa-miR-142-5p	4	0	14	6	3	0	2	9	0	12	18	3	52	0	8	18
hsa-miR-143-3p	54	42	106	36	99	9	34	72	6	109	71	45	200	79	0	98
hsa-miR-146a-5p	22	25	30	36	25	28	108	73	35	171	62	36	61	21	24	83
hsa-miR-146b-3p	1	4	18	0	22	24	19	22	4	45	5	2	5	15	5	33
hsa-miR-146b-5p	213	396	420	335	569	300	638	713	247	745	356	271	391	326	118	730
hsa-miR-148a-3p	334	985	219	3266	555	417	1306	454	1165	2025	689	268	617	263	310	1007
hsa-miR-148a-5p	3	9	2	26	10	3	16	10	3	7	10	2	9	0	2	7
hsa-miR-148b-3p	153	303	223	584	381	242	408	621	293	824	266	348	387	353	154	715
hsa-miR-148b-5p	2	2	5	197	12	11	48	17	2	1	1	3	13	8	30	19
hsa-miR-149-5p	30	64	3	194	63	20	85	18	156	109	22	7	56	1	7	36
hsa-miR-150-5p	36	31	69	3	55	29	47	198	10	132	14	27	118	26	8	46
hsa-miR-151a-3p	260	459	355	996	626	441	540	614	568	1391	355	305	533	277	129	860
hsa-miR-151a-5p@	166	297	459	289	421	348	483	1359	249	773	342	324	537	262	148	1253
hsa-miR-152-3p	109	565	690	723	700	764	667	938	397	1461	654	547	623	481	242	912
hsa-miR-153-3p	2	6	16	27	16	0	13	15	11	40	17	7	17	8	2	8
hsa-miR-155-5p	17	67	22	36	24	17	47	59	12	90	22	35	36	16	5	59
hsa-miR-1587	10	14	19	6	32	22	17	37	27	33	8	23	41	16	0	8
hsa-miR-15a-5p	30	61	55	68	101	43	61	156	32	91	69	62	78	39	28	128
hsa-miR-15b-3p	73	113	82	78	235	174	208	206	68	230	100	103	120	141	79	254
hsa-miR-15b-5p	234	320	571	286	771	595	521	1007	330	993	318	410	849	477	237	924
hsa-miR-16-2-3p	323	349	568	410	655	511	613	1727	423	1235	497	433	642	632	304	1368
hsa-miR-16-5p	1808	2785	3421	2166	4190	3047	3638	5257	1901	6283	2366	2233	3515	2087	1153	3878
hsa-miR-17-3p	6	1	8	0	7	5	16	11	1	20	4	3	10	2	0	7
hsa-miR-17-5p	25	37	84	31	58	42	49	81	29	103	22	46	49	44	49	112
hsa-miR-181a-5p	6	7	17	19	6	10	5	22	2	14	1	16	24	5	6	15
hsa-miR-181c-5p	16	8	3	11	18	10	6	10	9	50	8	4	13	14	3	25
hsa-miR-182-5p	427	546	293	394	946	407	350	966	277	1048	383	294	452	356	59	680
hsa-miR-183-5p	120	188	26	81	220	104	100	256	100	200	83	85	126	52	26	117
hsa-miR-184	14	1	36	12	27	26	7	33	2	23	1	10	10	22	4	35
hsa-miR-185-5p	3	3	12	2	13	18	5	21	7	42	3	0	17	4	8	26
hsa-miR-186-5p	126	246	149	331	252	116	188	280	170	501	121	126	192	91	58	256
hsa-miR-18a-3p	0	0	6	0	15	8	4	27	0	36	2	14	4	11	0	4
hsa-miR-18a-5p	28	61	64	36	89	50	77	128	88	102	56	62	34	32	11	135
hsa-miR-190b-5p	83	130	159	84	250	257	186	202	106	379	152	151	143	150	48	326
hsa-miR-191-5p	792	960	1656	1034	2239	1478	1541	3966	1110	2495	1380	1164	1759	1080	514	2681
hsa-miR-192-5p	174	268	265	238	423	340	392	556	266	789	311	232	368	216	71	535
hsa-miR-193a-5p	2	28	7	37	8	29	22	4	34	45	12	6	21	0	26	23
hsa-miR-194-5p	414	472	423	289	956	431	803	1364	271	1029	364	717	694	639	214	1794
hsa-miR-195-5p	43	45	30	26	78	39	53	90	72	142	54	32	72	35	26	87
hsa-miR-196a-5p	31	9	21	20	11	12	35	29	15	64	17	5	29	19	13	44
hsa-miR-196b-5p	27	29	0	74	22	7	16	2	38	77	1	5	13	3	6	27
hsa-miR-197-3p	3	5	11	14	19	4	1	11	23	20	1	0	5	0	0	1
hsa-miR-197-5p	5	12	4	0	9	11	4	11	2	0	0	0	0	0	17	1
hsa-miR-199a-3p	70	122	167	118	195	153	177	369	99	238	162	135	197	115	73	384
hsa-miR-199b-5p	3	5	7	18	12	7	24	33	3	22	8	3	3	8	12	34
hsa-miR-19a-3p	28	87	78	62	125	23	109	174	45	129	51	56	79	79	22	158
hsa-miR-19b-3p	132	321	213	130	312	136	268	600	124	399	227	157	219	168	113	483
hsa-miR-200a-3p	86	109	32	522	125	59	188	55	282	449	71	18	77	33	31	109
hsa-miR-200a-5p	9	13	4	9	8	1	5	0	13	47	0	3	14	7	0	2
hsa-miR-200b-3p	723	1009	281	1633	1206	432	1290	459	1742	3519	487	178	653	165	159	1116
hsa-miR-200b-5p	11	32	14	26	17	14	5	2	12	50	13	0	11	1	4	13
hsa-miR-200c-3p	252	477	105	714	521	221	511	155	699	1180	181	87	270	61	88	548
hsa-miR-203a-5p	4	9	11	13	5	15	18	4	9	19	8	2	2	9	7	17
hsa-miR-203b-5p	229	318	229	394	318	237	364	451	269	813	249	266	266	203	83	438
hsa-miR-204-5p	19	6	49	3	31	37	29	39	38	117	12	35	49	33	20	44
hsa-miR-205-5p	14	29	1	37	2	13	28	20	40	51	7	5	30	0	9	19
hsa-miR-20a-5p	102	140	215	128	236	215	221	243	116	459	136	160	138	202	71	532
hsa-miR-20b-5p	1	17	0	20	12	1	0	0	5	5	4	0	1	0	5	18
hsa-miR-21-5p	2773	6420	3515	9458	7084	3857	7020	8444	4693	14586	4671	4287	6979	4542	2058	11179
hsa-miR-2110	23	3	4	19	1	5	4	16	7	24	0	0	9	13	0	8
hsa-miR-212-5p	3	22	4	6	15	5	14	20	4	12	13	16	18	4	4	7
hsa-miR-215-3p	3	0	0	0	10	7	3	10	3	0	4	13	3	6	1	43
hsa-miR-215-5p	56	63	26	50	111	58	53	129	32	85	91	236	42	61	18	291
hsa-miR-216b-5p	2	10	10	8	11	14	8	22	4	39	7	18	14	4	0	36
hsa-miR-218-5p	99	79	91	68	208	65	109	207	82	382	125	121	62	112	61	171
hsa-miR-22-3p	263	430	209	1379	361	305	846	452	730	1063	396	196	781	206	327	391
hsa-miR-22-5p	18	22	54	45	71	44	71	109	38	70	40	20	67	28	35	136
hsa-miR-221-3p	10	31	25	54	6	13	49	34	22	66	17	7	75	7	21	41
hsa-miR-222-3p	14	1	9	13	4	1	15	7	6	43	8	8	30	4	10	46
hsa-miR-223-3p	23	3	345	35	11	17	6	99	0	95	94	16	499	13	7	126
hsa-miR-224-5p	3	13	3	1	3	13	35	22	0	28	24	16	8	10	7	28
hsa-miR-2392	37	7	9	6	18	11	25	28	7	26	13	8	33	4	6	15
hsa-miR-23a-3p	68	166	88	308	126	114	141	261	126	352	93	44	290	42	52	274
hsa-miR-23b-3p	86	114	93	251	176	165	198	234	195	527	83	92	141	55	41	235
hsa-miR-25-3p	1228	2101	2062	1792	2956	2557	2480	3296	1536	4722	1738	1559	2166	2183	957	3723
hsa-miR-26a-5p	805	1814	834	2258	1592	885	1677	1566	1905	4557	913	482	1284	672	334	2423
hsa-miR-26b-5p	342	556	235	1274	465	284	748	557	726	1804	330	128	576	138	123	898
hsa-miR-27a-3p	82	250	124	382	312	129	271	285	170	681	198	135	409	154	63	237
hsa-miR-27b-3p	223	328	245	634	509	245	513	605	301	957	323	284	399	281	168	766
hsa-miR-28-3p	283	526	445	557	581	460	524	766	469	1426	308	363	559	465	111	834
hsa-miR-28-5p	523	763	890	683	1108	623	829	2325	484	2369	564	868	1222	897	277	2345
hsa-miR-29a-3p	253	603	186	2440	551	374	864	413	836	1123	523	189	590	129	212	633
hsa-miR-29b-3p	47	128	34	1555	101	51	431	25	186	331	139	25	261	18	215	97
hsa-miR-29c-3p	67	110	51	1234	149	52	386	135	275	389	152	45	215	30	210	104
hsa-miR-29c-5p	5	0	2	38	7	9	17	1	10	16	6	2	5	5	0	3
hsa-miR-3074-5p	89	198	120	409	129	154	199	206	160	553	124	77	356	52	83	299
hsa-miR-30a-3p	346	403	499	476	874	359	684	794	260	1261	291	486	452	489	174	679
hsa-miR-30a-5p	4791	10254	7093	9246	13204	6693	9785	15804	4236	23532	7718	9919	7825	5404	2167	11088
hsa-miR-30b-5p	112	135	276	138	230	193	326	487	148	394	131	97	266	212	113	558
hsa-miR-30c-5p	162	245	357	198	609	371	344	841	230	1175	217	249	468	379	158	972
hsa-miR-30d-5p	1820	2904	3220	3626	3429	3678	3508	6616	2975	9354	2894	2417	4109	1978	843	5382
hsa-miR-30e-3p	259	533	409	795	671	501	514	641	324	1303	360	279	407	457	98	968
hsa-miR-30e-5p	596	1822	1063	1831	1964	987	1697	2404	1183	4226	1497	1302	1508	982	513	2898
hsa-miR-31-5p	65	35	45	36	116	82	66	151	26	292	46	47	86	37	9	151
hsa-miR-3158-5p	3	0	18	1	23	1	13	30	4	29	16	13	16	10	5	17
hsa-miR-3162-3p	92	37	70	29	180	5	127	83	86	91	25	55	59	19	22	60
hsa-miR-3184-3p	25	36	25	74	33	46	37	82	56	73	27	10	53	16	26	95
hsa-miR-3184-5p	76	193	207	371	193	200	397	349	342	720	166	143	394	145	143	397
hsa-miR-3195	119	115	127	120	157	224	404	240	375	305	74	246	184	96	59	111
hsa-miR-32-3p	1	8	6	9	13	12	9	6	7	20	5	7	12	2	1	16
hsa-miR-32-5p	0	14	1	16	9	14	3	8	8	24	8	21	5	6	5	15
hsa-miR-320a-3p	93	149	82	519	193	252	356	179	338	390	186	10	240	92	104	425
hsa-miR-320b	9	6	9	12	10	21	37	16	22	37	14	1	18	8	6	12
hsa-miR-320c	9	5	2	23	21	4	25	13	23	19	8	1	33	1	12	7
hsa-miR-323a-3p	1	1	9	20	4	2	15	15	12	42	9	7	11	3	5	22
hsa-miR-324-3p	12	23	1	52	17	27	28	8	27	59	15	2	19	0	6	2
hsa-miR-326	5	3	3	17	1	2	2	15	19	14	8	0	6	0	8	9
hsa-miR-328-3p	3	1	21	1	14	26	14	17	0	24	1	6	11	3	0	4
hsa-miR-329-3p	0	10	5	6	5	11	4	33	7	15	0	4	8	5	4	9
hsa-miR-331-3p	24	9	35	14	43	65	28	101	27	90	8	33	30	18	4	55
hsa-miR-335-3p	314	1027	764	896	1544	906	854	1307	744	4841	933	538	926	2005	413	2830
hsa-miR-335-5p	466	610	782	645	1209	452	846	1954	539	1815	619	566	1101	748	311	1880
hsa-miR-339-3p	6	11	6	17	5	2	7	12	18	28	15	6	10	10	1	8
hsa-miR-339-5p	1	15	5	32	9	12	5	7	9	15	8	1	6	0	0	24
hsa-miR-340-3p	9	30	34	15	20	17	32	50	21	65	12	27	38	19	14	80
hsa-miR-340-5p	73	121	108	78	179	152	207	401	68	370	177	215	263	138	72	650
hsa-miR-342-3p	8	19	22	45	19	33	35	72	30	109	36	13	50	29	16	67
hsa-miR-345-5p	22	39	8	77	34	29	35	15	65	61	10	1	11	11	17	22
hsa-miR-34b-3p	248	439	1028	199	1029	1040	643	2453	503	2222	488	620	959	1082	373	2053
hsa-miR-34b-5p	70	89	107	29	110	77	257	420	128	210	79	64	141	107	35	233
hsa-miR-34c-3p	50	57	129	43	117	111	140	199	70	355	84	67	149	97	33	250
hsa-miR-34c-5p	659	834	1310	863	1444	1025	1938	2808	632	1716	789	897	1487	1144	652	2535
hsa-miR-3529-3p	112	124	104	121	200	219	199	250	76	372	192	79	129	191	62	567
hsa-miR-361-3p	14	13	6	8	12	8	6	36	27	11	5	17	30	9	14	31
hsa-miR-361-5p	40	68	83	158	92	76	82	104	118	159	39	27	67	25	20	104
hsa-miR-3613-5p	75	303	171	308	437	182	278	421	180	625	212	254	401	497	270	1257
hsa-miR-3617-5p	7	14	17	6	30	20	14	28	1	28	9	6	18	16	16	50
hsa-miR-3620-5p	74	70	134	45	206	145	72	114	115	98	70	36	151	56	28	195
hsa-miR-363-3p	337	1022	73	2476	370	163	603	215	992	1251	302	104	269	76	94	542
hsa-miR-365a-3p	0	10	3	19	13	9	6	14	26	49	8	1	9	0	8	15
hsa-miR-3663-3p	7	15	1	5	11	0	1	3	5	10	0	6	13	0	2	7
hsa-miR-3663-5p	4	3	11	2	10	6	3	8	9	23	7	0	6	4	5	15
hsa-miR-369-3p	2	10	8	10	12	12	38	12	1	25	15	20	2	6	9	34
hsa-miR-371b-3p	0	2	1	6	11	11	11	10	0	4	1	0	4	1	0	6
hsa-miR-371b-5p	7	1	11	0	4	2	9	17	16	0	1	4	0	2	0	21
hsa-miR-372-3p	12	33	53	8	80	38	41	54	29	56	24	23	40	38	8	40
hsa-miR-373-3p	19	30	18	23	37	9	18	25	32	53	11	11	26	15	20	19
hsa-miR-373-5p	3	0	7	2	11	19	15	18	5	15	7	3	9	10	3	23
hsa-miR-374a-3p	3	11	7	8	2	0	7	6	10	15	7	2	9	3	0	28
hsa-miR-374a-5p	25	70	31	165	82	16	82	90	67	191	50	54	58	47	6	140
hsa-miR-374c-3p	23	82	27	128	49	29	39	36	47	142	23	25	42	19	5	59
hsa-miR-375-3p	855	1667	512	3901	1812	1089	2009	1188	3216	4169	731	507	926	654	436	1685
hsa-miR-376a-3p	6	5	7	10	16	0	14	13	0	18	2	9	11	2	10	14
hsa-miR-378a-3p	28	22	44	17	38	23	35	29	26	89	56	31	74	36	28	79
hsa-miR-379-5p	4	11	13	7	20	1	38	11	1	37	9	6	14	12	4	27
hsa-miR-381-3p	0	2	2	9	10	1	7	6	2	14	1	5	22	5	6	12
hsa-miR-382-5p	3	0	5	1	8	7	5	37	9	7	16	10	2	24	3	30
hsa-miR-3911	14	9	34	10	55	30	21	101	15	12	3	27	33	15	13	32
hsa-miR-3925-3p	12	18	16	11	17	18	17	69	5	13	12	24	22	17	0	31
hsa-miR-3940-3p	1	3	13	0	9	6	2	30	2	26	2	2	9	3	2	17
hsa-miR-3972	15	10	4	0	0	19	10	13	6	0	0	3	3	0	2	3
hsa-miR-411-5p	1	20	24	30	33	11	53	38	10	67	23	22	29	20	12	64
hsa-miR-421	5	11	2	21	13	4	6	4	2	28	0	1	14	0	0	13
hsa-miR-423-3p	4	0	5	3	0	2	6	33	7	25	7	7	21	6	9	25
hsa-miR-424-3p	0	2	8	2	7	11	10	16	2	20	3	3	13	0	0	21
hsa-miR-425-3p	8	21	32	25	17	5	15	37	10	13	2	4	23	4	12	21
hsa-miR-425-5p	367	613	828	532	1461	788	883	1816	430	1283	749	742	888	603	293	1124
hsa-miR-4284	1	1	14	0	0	4	20	8	6	10	3	29	51	0	22	6
hsa-miR-4286	2	0	11	13	24	4	2	27	16	22	12	7	8	3	0	14
hsa-miR-429	24	63	14	170	75	29	55	17	89	196	31	6	21	7	33	39
hsa-miR-4298	5	5	2	0	5	12	7	12	7	0	0	5	11	10	0	10
hsa-miR-4301	3	9	13	17	6	5	10	6	3	10	4	4	4	0	0	3
hsa-miR-4313	8	0	12	0	0	7	8	8	13	6	4	6	13	0	0	10
hsa-miR-4324	21	6	4	10	5	9	20	10	5	17	0	2	41	3	1	8
hsa-miR-4423-5p	0	0	12	0	16	8	2	8	4	120	20	7	10	5	4	23
hsa-miR-4440	20	9	6	5	22	7	2	5	5	11	3	5	10	0	6	5
hsa-miR-4443	370	1010	72	253	104	1847	129	214	663	332	1049	228	557	134	105	213
hsa-miR-4448	13	5	3	4	1	10	3	4	12	13	4	1	0	2	4	3
hsa-miR-4484	7	0	3	11	1	0	9	12	0	10	10	5	23	0	6	13
hsa-miR-4485-3p	970	217	705	346	1059	622	708	989	413	1588	459	690	1081	275	379	484
hsa-miR-4485-5p	10	1	29	6	6	2	3	11	1	14	2	4	7	1	2	6
hsa-miR-449a	220	256	286	169	383	214	410	510	168	366	196	247	299	190	101	461
hsa-miR-449b-3p	0	0	15	0	1	9	9	25	4	10	0	1	8	7	0	31
hsa-miR-449b-5p	0	17	5	2	14	5	8	9	3	2	4	3	3	11	3	20
hsa-miR-449c-3p	10	9	6	18	0	0	0	3	0	46	2	6	18	4	0	7
hsa-miR-4507	19	20	35	13	49	39	31	48	34	25	7	24	44	12	18	39
hsa-miR-451a	13	22	41	22	16	10	59	6	16	22	27	388	4	4	1252	396
hsa-miR-455-5p	5	9	6	10	7	15	4	29	9	10	16	1	17	5	0	5
hsa-miR-4661-5p	0	2	7	0	12	29	2	15	0	34	9	0	9	5	2	14
hsa-miR-4662b	2	0	2	10	8	11	9	35	5	32	12	7	17	5	0	23
hsa-miR-4687-5p	13	10	0	0	1	27	2	10	4	0	7	2	8	3	0	1
hsa-miR-4705	9	6	14	6	22	7	29	69	13	66	3	23	12	29	0	40
hsa-miR-4749-3p	10	0	15	0	11	3	21	31	13	5	16	6	5	19	4	23
hsa-miR-4757-3p	178	8	1	0	1	25	0	0	84	0	0	0	46	0	5	5
hsa-miR-484	38	161	24	475	51	71	155	70	154	202	106	28	88	9	48	68
hsa-miR-486-3p	205	47	161	102	147	105	154	468	57	146	145	376	112	86	269	370
hsa-miR-487b-3p	3	5	2	2	2	4	18	14	1	10	4	1	10	1	3	21
hsa-miR-488-3p	31	21	22	1	2	11	24	42	5	50	0	16	12	8	0	16
hsa-miR-491-3p	3	6	0	11	4	0	11	0	0	23	30	11	12	0	2	1
hsa-miR-498-5p	0	0	2	10	0	3	8	26	6	11	3	3	5	8	0	11
hsa-miR-499b-3p	83	229	69	98	315	47	96	422	84	344	153	140	177	139	46	221
hsa-miR-499b-5p	0	126	0	32	6	42	9	5	9	186	1	8	2	9	0	50
hsa-miR-5006-5p	9	0	12	2	29	19	9	30	6	0	9	8	12	7	2	18
hsa-miR-500a-3p	6	1	14	31	6	11	22	20	8	32	9	0	19	1	0	19
hsa-miR-501-3p	2	12	15	10	10	6	9	37	4	20	11	1	8	4	4	11
hsa-miR-502-3p	8	7	2	20	10	14	13	10	18	43	6	1	14	3	5	9
hsa-miR-505-3p	2	5	12	20	9	12	16	19	4	20	13	6	13	0	2	23
hsa-miR-508-3p	37	7	27	50	107	32	49	67	28	40	25	61	52	20	24	68
hsa-miR-5088-5p	1	3	3	2	42	15	6	21	16	0	5	3	2	2	3	0
hsa-miR-509-3-5p	36	4	19	9	69	11	20	30	5	7	7	30	25	21	5	29
hsa-miR-509-3p	7	0	3	1	3	5	10	4	3	8	1	2	10	1	12	15
hsa-miR-5100	3	9	38	32	32	15	27	87	21	41	6	19	73	4	11	32
hsa-miR-512-3p	7	5	15	7	9	10	19	13	3	40	3	4	4	21	3	30
hsa-miR-513a-5p	5	5	13	2	17	2	7	12	2	3	2	11	2	2	0	21
hsa-miR-513b-5p	9	0	11	14	8	5	13	12	1	23	0	4	0	3	0	11
hsa-miR-514a-3p	27	12	14	93	102	13	32	40	27	75	18	29	25	7	15	37
hsa-miR-515-5p	3	10	22	4	17	4	7	13	12	22	11	6	15	6	5	22
hsa-miR-516a-5p	90	77	128	100	153	84	112	305	33	211	131	99	63	106	46	181
hsa-miR-516b-5p	24	28	61	16	68	33	30	104	11	79	26	23	51	34	12	86
hsa-miR-517-5p	9	8	12	1	13	19	7	44	11	21	1	15	7	13	4	22
hsa-miR-517b-3p	81	191	153	192	279	184	225	340	286	489	186	241	295	111	133	293
hsa-miR-517c-3p	11	8	12	65	62	23	67	79	22	79	22	30	35	14	16	41
hsa-miR-518a-3p	25	25	24	0	23	7	13	30	17	36	0	14	12	7	3	12
hsa-miR-518c-3p	7	18	3	15	7	14	6	17	11	10	0	11	1	12	0	3
hsa-miR-518e-3p	13	14	11	6	47	16	24	36	5	42	31	13	11	23	0	65
hsa-miR-518f-3p	7	5	1	0	11	7	18	9	3	20	5	3	14	2	0	8
hsa-miR-519a-3p	13	22	6	12	46	12	22	33	22	36	7	13	21	7	10	27
hsa-miR-519b-5p	26	37	47	47	69	67	45	127	24	147	49	43	42	46	6	122
hsa-miR-519c-3p	9	18	7	22	19	10	15	22	6	50	13	10	16	7	0	26
hsa-miR-519d-3p	5	9	20	10	5	20	7	12	5	20	26	3	21	1	10	13
hsa-miR-519d-5p	15	10	12	26	26	10	8	16	11	20	2	6	28	5	6	3
hsa-miR-520a-3p	18	27	19	33	11	9	24	64	17	74	15	7	42	18	12	43
hsa-miR-520a-5p	13	17	30	54	53	41	36	92	13	91	29	26	37	36	11	99
hsa-miR-520b-3p@	13	14	6	2	17	4	10	6	6	31	10	3	17	0	3	31
hsa-miR-520g-3p@	11	53	18	17	56	45	35	74	16	73	12	37	32	27	3	61
hsa-miR-520g-5p	2	0	5	5	1	0	6	1	3	10	1	11	10	0	6	12
hsa-miR-521	3	0	9	1	13	5	3	14	8	17	8	5	23	4	5	11
hsa-miR-522-3p	68	80	154	90	255	131	130	362	82	253	88	113	150	83	35	193
hsa-miR-523-3p	7	6	8	9	11	33	11	25	18	69	28	22	22	11	3	38
hsa-miR-525-5p	6	0	3	3	7	9	0	19	11	8	0	8	15	10	7	13
hsa-miR-532-3p	13	12	8	0	5	10	0	15	3	4	7	0	7	0	4	0
hsa-miR-532-5p	16	22	29	25	36	21	39	42	25	68	35	9	13	27	12	37
hsa-miR-548a-3p	11	4	9	1	5	6	14	32	5	16	11	18	17	17	2	3
hsa-miR-548ae-5p@	9	62	16	27	83	23	39	115	17	116	32	31	52	42	11	93
hsa-miR-548ah-3p@	6	27	13	9	23	16	20	19	10	33	10	22	7	14	10	12
hsa-miR-548aj-5p@	2	25	8	13	13	19	22	24	3	47	11	10	12	5	10	47
hsa-miR-548ap-3p@	54	124	94	118	166	98	192	317	78	348	135	110	122	115	81	303
hsa-miR-548au-5p@	9	8	5	12	11	12	17	9	0	7	0	12	10	7	0	26
hsa-miR-548az-5p	14	2	8	19	9	6	4	17	2	19	4	6	14	17	8	22
hsa-miR-548b-5p	18	31	10	16	26	30	7	17	11	55	8	22	18	24	0	23
hsa-miR-548e-3p	10	4	3	12	10	2	10	53	5	8	7	4	4	10	3	38
hsa-miR-548f-3p@	0	1	2	3	3	7	4	23	0	1	11	12	6	2	0	13
hsa-miR-548f-5p	0	0	3	0	1	10	10	16	4	3	0	3	3	7	18	12
hsa-miR-548z	33	64	41	70	56	34	35	149	49	178	74	81	42	64	17	164
hsa-miR-550b-3p	1	1	11	19	32	7	8	19	11	20	4	11	14	8	0	23
hsa-miR-552-3p	18	23	21	17	26	41	16	45	0	26	24	18	16	19	6	39
hsa-miR-552-5p	50	194	137	32	279	159	151	167	52	293	108	75	93	181	55	289
hsa-miR-5683	11	14	5	5	21	2	5	10	2	34	7	14	1	4	2	19
hsa-miR-574-3p	14	15	2	84	20	34	32	12	70	100	6	5	27	0	1	47
hsa-miR-576-5p	0	5	12	15	7	13	3	13	8	11	3	3	19	12	0	11
hsa-miR-577	5	9	3	4	14	6	0	10	9	1	7	0	17	6	4	26
hsa-miR-590-3p	14	14	28	31	45	33	37	44	25	72	45	59	27	40	18	136
hsa-miR-592	5	5	8	1	9	7	21	17	9	33	12	7	7	7	7	19
hsa-miR-6089	21	8	12	21	27	30	32	39	42	19	12	22	16	3	6	14
hsa-miR-6124	16	3	8	51	18	0	12	15	9	0	1	0	5	1	16	5
hsa-miR-6132	2	2	0	0	3	13	6	14	0	10	0	0	20	0	10	0
hsa-miR-616-5p	9	2	4	1	3	9	10	27	1	18	2	9	15	2	2	7
hsa-miR-618	23	22	12	10	61	4	14	81	11	94	12	63	43	25	0	94
hsa-miR-619-5p	21	4	5	4	14	53	0	10	8	0	4	0	2	1	9	10
hsa-miR-625-3p	15	9	19	3	40	18	11	20	4	31	3	5	28	16	12	43
hsa-miR-625-5p	80	196	244	152	169	225	282	466	141	711	151	147	260	119	60	433
hsa-miR-628-3p	19	27	76	40	62	42	35	112	32	77	34	14	78	33	1	76
hsa-miR-628-5p	12	24	15	22	12	9	12	42	16	24	14	5	23	9	1	43
hsa-miR-629-5p	8	47	13	28	20	20	26	56	17	46	37	19	22	30	5	65
hsa-miR-651-5p	18	33	24	8	42	27	28	46	16	38	20	34	39	28	7	69
hsa-miR-652-3p	10	9	50	82	44	30	66	45	99	205	48	29	147	10	8	57
hsa-miR-654-3p	0	2	0	1	5	0	3	25	0	0	12	3	12	9	0	10
hsa-miR-655-3p	3	11	0	14	10	5	13	2	0	5	10	18	10	2	0	15
hsa-miR-660-5p	16	12	24	17	26	13	44	41	16	39	24	6	23	23	8	44
hsa-miR-664a-3p	6	2	43	10	28	20	29	67	12	65	19	16	26	38	7	34
hsa-miR-671-5p	12	7	4	14	2	13	0	17	3	5	2	5	11	0	2	0
hsa-miR-6749-5p	15	17	5	0	0	10	1	12	1	5	0	0	3	0	6	4
hsa-miR-6756-5p	12	6	3	1	20	23	4	20	20	0	10	7	4	2	21	1
hsa-miR-6771-3p	14	7	26	0	29	11	2	4	6	16	4	7	10	0	0	5
hsa-miR-6779-5p	27	36	4	4	10	16	21	21	0	15	2	8	15	6	17	5
hsa-miR-6780b-3p	13	19	3	15	2	15	19	20	7	18	6	9	5	5	0	11
hsa-miR-6795-5p	50	10	89	25	203	58	68	142	39	96	26	48	103	43	6	54
hsa-miR-6812-5p	373	174	885	83	649	226	729	434	149	812	268	467	924	84	140	284
hsa-miR-6832-3p	6	10	5	89	22	0	28	20	12	5	17	7	17	3	2	9
hsa-miR-6855-5p	3	0	10	6	2	10	1	23	1	9	2	4	6	12	8	10
hsa-miR-6860	11	9	10	8	0	9	7	12	0	0	0	0	7	5	11	4
hsa-miR-6883-5p	29	1	0	0	0	11	7	5	14	18	3	4	6	15	7	4
hsa-miR-6891-3p	17	10	2	1	8	8	2	14	0	10	0	2	0	3	0	2
hsa-miR-7-1-3p	39	41	34	14	82	63	40	93	42	130	38	13	66	46	25	131
hsa-miR-7110-3p	12	6	3	0	16	12	1	16	4	5	0	5	7	0	0	3
hsa-miR-7154-5p	4	1	4	14	9	15	14	6	5	8	0	6	2	11	2	8
hsa-miR-7162-3p	22	14	2	138	16	32	29	8	41	15	46	25	16	0	18	15
hsa-miR-760	32	16	1	8	8	33	2	32	3	18	0	2	1	4	8	0
hsa-miR-766-3p	74	3	1	8	2	30	10	24	17	3	3	2	14	0	3	2
hsa-miR-767-5p	13	4	30	0	13	19	7	19	7	34	3	11	8	9	4	21
hsa-miR-769-5p	94	166	251	83	157	226	275	407	103	442	146	178	171	201	63	437
hsa-miR-7853-5p	0	0	11	0	11	1	0	10	7	0	0	1	12	3	0	2
hsa-miR-7977	146	60	383	134	660	390	205	1550	270	352	195	494	921	73	68	306
hsa-miR-873-3p	5	6	11	6	9	9	11	1	1	13	3	4	10	0	0	8
hsa-miR-873-5p	37	66	60	50	81	40	35	105	55	125	69	59	58	64	16	89
hsa-miR-874-5p	2	11	3	0	15	5	14	19	0	1	1	0	6	0	0	5
hsa-miR-888-5p	5	4	13	20	8	6	18	15	16	22	14	4	21	6	18	13
hsa-miR-891a-5p	57	38	45	326	61	27	218	59	169	288	86	25	182	9	161	52
hsa-miR-891b	4	14	4	82	4	10	52	8	23	32	15	0	20	2	32	14
hsa-miR-892a	1	1	5	1	7	1	10	13	0	7	11	4	9	4	2	10
hsa-miR-9-3p	241	346	298	280	475	306	445	776	221	591	495	362	487	253	83	548
hsa-miR-9-5p	527	381	574	575	934	499	914	2038	386	1107	925	993	1032	978	359	1514
hsa-miR-92a-3p	358	837	1091	1486	791	1275	903	1233	1052	1824	569	404	1119	416	415	708
hsa-miR-92b-3p	39	91	175	73	134	100	131	125	81	188	67	30	77	66	33	83
hsa-miR-93-5p	310	307	524	231	671	554	436	881	228	932	281	344	444	667	284	1364
hsa-miR-937-5p	13	8	7	4	14	7	3	27	4	4	4	1	10	6	17	10
hsa-miR-941	16	19	40	8	38	13	10	69	28	61	3	30	24	16	2	77
hsa-miR-942-5p	4	11	33	11	23	15	13	44	11	32	12	15	26	20	3	75
hsa-miR-944	0	8	5	1	15	10	20	11	8	26	8	7	5	1	0	13
hsa-miR-95-3p	73	134	69	63	157	110	105	256	63	203	83	120	121	92	15	206
hsa-miR-95-5p	1	1	19	9	7	12	7	8	7	8	0	3	12	4	2	14
hsa-miR-96-5p	66	210	26	117	211	106	77	78	31	195	70	31	71	54	19	58
hsa-miR-98-5p	5	4	7	16	4	0	8	29	8	37	6	4	23	3	0	18
hsa-miR-9903	2	5	1	29	6	7	11	16	5	11	4	16	13	6	0	21
hsa-miR-99a-5p	682	1484	1329	3301	1504	1371	1623	4039	1293	3018	1143	1085	1525	618	227	1158
hsa-miR-99b-5p	38	60	90	214	78	89	188	227	144	363	115	27	112	39	42	119

## Sheet: Supplementary Table S5
Supplementary Table S5 - Small RNA sequencing studies included. Information regarding the number of miRNAs identified in each study and the condition studied was presented.
Reference	Condition studied	# miRNAs identified
Krawetz et al., 2011	Fertile donors	35
Pantano et al., 2015	Fertile donors	314
Schuster et al., 2016	Healthy adult men	299
Ingerslev et al., 2018	Untrained, trained, detrained state participants	651
Nätt et al., 2019	Men subjected to a 2-week diet intervention	287
Hua et al., 2019	Male partners of couples undergoing IVF treatment	467
Xu et al., 2020	Patients with a normal sperm index but treated with ART	797

## Sheet: Supplementary Table S6
Supplementary Table S6 - List of miRNAs previously identified in other studies using RNA sequencing and ejaculated human sperm.
miRNA	References
hsa-let-7a-1	Nätt et al., 2019
hsa-let-7a-2	Nätt et al., 2019
hsa-let-7a-3	Nätt et al., 2019
hsa-let-7a-3p	Xu H et al., 2020
	Hua et al., 2019
	Ingerslev et al., 2018
	Pantano et al., 2015
hsa-let-7a-5p	Pantano et al., 2015
	Schuster et al., 2016
	Xu H et al., 2020
	Hua et al., 2019
	Ingerslev et al., 2018
hsa-let-7b	Krawetz et al., 2011
	Nätt et al., 2019
hsa-let-7b-3p	Schuster et al., 2016
	Xu H et al., 2020
	Hua et al., 2019
	Ingerslev et al., 2018
hsa-let-7b-5p	Pantano et al., 2015
	Schuster et al., 2016
	Xu H et al., 2020
	Hua et al., 2019
	Ingerslev et al., 2018
hsa-let-7c	Krawetz et al., 2011
	Nätt et al., 2019
	Pantano et al., 2015
	Xu H et al., 2020
hsa-let-7c-3p	Ingerslev et al., 2018
hsa-let-7c-5p	Schuster et al., 2016
	Hua et al., 2019
	Ingerslev et al., 2018
hsa-let-7d	Nätt et al., 2019
hsa-let-7d-3p	Schuster et al., 2016
	Xu H et al., 2020
	Hua et al., 2019
	Ingerslev et al., 2018
hsa-let-7d-5p	Pantano et al., 2015
	Schuster et al., 2016
	Xu H et al., 2020
	Hua et al., 2019
	Ingerslev et al., 2018
hsa-let-7e	Krawetz et al., 2011
	Nätt et al., 2019
hsa-let-7e-3p	Xu H et al., 2020
hsa-let-7e-5p	Pantano et al., 2015
	Schuster et al., 2016
	Xu H et al., 2020
	Hua et al., 2019
	Ingerslev et al., 2018
hsa-let-7f-1	Nätt et al., 2019
hsa-let-7f-1-3p	Xu H et al., 2020
hsa-let-7f-2	Nätt et al., 2019
hsa-let-7f-2-3p	Xu H et al., 2020
	Ingerslev et al., 2018
hsa-let-7f-5p	Pantano et al., 2015
	Schuster et al., 2016
	Xu H et al., 2020
	Hua et al., 2019
	Ingerslev et al., 2018
hsa-let-7g	Krawetz et al., 2011
	Nätt et al., 2019
hsa-let-7g-3p	Xu H et al., 2020
hsa-let-7g-5p	Pantano et al., 2015
	Schuster et al., 2016
	Xu H et al., 2020
	Hua et al., 2019
	Ingerslev et al., 2018
hsa-let-7i	Nätt et al., 2019
hsa-let-7i-3p	Xu H et al., 2020
	Ingerslev et al., 2018
hsa-let-7i-5p	Pantano et al., 2015
	Schuster et al., 2016
	Xu H et al., 2020
	Hua et al., 2019
	Ingerslev et al., 2018
hsa-miR-1	Pantano et al., 2015
	Xu H et al., 2020
hsa-miR-100	Krawetz et al., 2011
	Nätt et al., 2019
hsa-miR-100-5p	Pantano et al., 2015
	Schuster et al., 2016
	Xu H et al., 2020
	Hua et al., 2019
	Ingerslev et al., 2018
hsa-miR-101-1	Nätt et al., 2019
hsa-miR-101-2	Nätt et al., 2019
hsa-miR-101-3p	Pantano et al., 2015
	Schuster et al., 2016
	Xu H et al., 2020
	Hua et al., 2019
	Ingerslev et al., 2018
hsa-miR-101-5p	Pantano et al., 2015
	Xu H et al., 2020
hsa-miR-103a-1	Nätt et al., 2019
hsa-miR-103a-2	Nätt et al., 2019
hsa-miR-103a-2-5p	Xu H et al., 2020
hsa-miR-103a-3p	Pantano et al., 2015
	Schuster et al., 2016
	Xu H et al., 2020
	Hua et al., 2019
	Ingerslev et al., 2018
hsa-miR-103b	Ingerslev et al., 2018
hsa-miR-105-1	Nätt et al., 2019
hsa-miR-105-2	Nätt et al., 2019
hsa-miR-105-5p	Pantano et al., 2015
	Xu H et al., 2020
	Hua et al., 2019
	Ingerslev et al., 2018
hsa-miR-106a	Nätt et al., 2019
hsa-miR-106a-3p	Ingerslev et al., 2018
hsa-miR-106a-5p	Schuster et al., 2016
	Xu H et al., 2020
	Hua et al., 2019
	Ingerslev et al., 2018
hsa-miR-106b	Nätt et al., 2019
hsa-miR-106b-3p	Pantano et al., 2015
	Schuster et al., 2016
	Xu H et al., 2020
	Hua et al., 2019
	Ingerslev et al., 2018
hsa-miR-106b-5p	Pantano et al., 2015
	Schuster et al., 2016
	Xu H et al., 2020
	Hua et al., 2019
	Ingerslev et al., 2018
hsa-miR-107	Nätt et al., 2019
	Xu H et al., 2020
	Hua et al., 2019
	Ingerslev et al., 2018
hsa-miR-10a	Krawetz et al., 2011
	Nätt et al., 2019
hsa-miR-10a-3p	Pantano et al., 2015
	Xu H et al., 2020
	Hua et al., 2019
	Ingerslev et al., 2018
hsa-miR-10a-5p	Pantano et al., 2015
	Schuster et al., 2016
	Xu H et al., 2020
	Hua et al., 2019
	Ingerslev et al., 2018
hsa-miR-10b	Nätt et al., 2019
hsa-miR-10b-3p	Xu H et al., 2020
	Hua et al., 2019
	Ingerslev et al., 2018
hsa-miR-10b-5p	Pantano et al., 2015
	Schuster et al., 2016
	Xu H et al., 2020
	Hua et al., 2019
	Ingerslev et al., 2018
hsa-miR-1-1	Nätt et al., 2019
hsa-miR-1180	Nätt et al., 2019
	Xu H et al., 2020
hsa-miR-1180-3p	Schuster et al., 2016
	Hua et al., 2019
	Ingerslev et al., 2018
hsa-miR-1181	Pantano et al., 2015
	Ingerslev et al., 2018
hsa-miR-1185-1-3p	Pantano et al., 2015
	Xu H et al., 2020
hsa-miR-1185-2-3p	Pantano et al., 2015
hsa-miR-1185-5p	Xu H et al., 2020
hsa-miR-1197	Xu H et al., 2020
hsa-miR-1-2	Nätt et al., 2019
hsa-miR-12136	Hua et al., 2019
hsa-miR-122	Krawetz et al., 2011
	Nätt et al., 2019
hsa-miR-122-3p	Schuster et al., 2016
	Xu H et al., 2020
	Hua et al., 2019
	Ingerslev et al., 2018
hsa-miR-1224-5p	Ingerslev et al., 2018
hsa-miR-1225-3p	Ingerslev et al., 2018
hsa-miR-122-5p	Pantano et al., 2015
	Schuster et al., 2016
	Xu H et al., 2020
	Hua et al., 2019
	Ingerslev et al., 2018
hsa-miR-1226-3p	Xu H et al., 2020
hsa-miR-1227-5p	Ingerslev et al., 2018
hsa-miR-1229-5p	Ingerslev et al., 2018
hsa-miR-1231	Pantano et al., 2015
hsa-miR-1233-3p	Pantano et al., 2015
hsa-miR-124-3p	Pantano et al., 2015
	Xu H et al., 2020
	Hua et al., 2019
	Ingerslev et al., 2018
hsa-miR-1244	Ingerslev et al., 2018
hsa-miR-1245b-3p	Ingerslev et al., 2018
hsa-miR-1246	Nätt et al., 2019
	Pantano et al., 2015
	Xu H et al., 2020
	Hua et al., 2019
	Ingerslev et al., 2018
hsa-miR-1247-5p	Xu H et al., 2020
hsa-miR-1248	Xu H et al., 2020
	Ingerslev et al., 2018
hsa-miR-1249-3p	Schuster et al., 2016
hsa-miR-1251	Xu H et al., 2020
hsa-miR-1251-3p	Ingerslev et al., 2018
hsa-miR-1251-5p	Hua et al., 2019
	Ingerslev et al., 2018
hsa-miR-1255a	Xu H et al., 2020
hsa-miR-1255b-5p	Xu H et al., 2020
hsa-miR-1256	Xu H et al., 2020
hsa-miR-1257	Ingerslev et al., 2018
hsa-miR-125a	Nätt et al., 2019
hsa-miR-125a-3p	Xu H et al., 2020
	Hua et al., 2019
	Ingerslev et al., 2018
hsa-miR-125a-5p	Pantano et al., 2015
	Schuster et al., 2016
	Xu H et al., 2020
	Hua et al., 2019
	Ingerslev et al., 2018
hsa-miR-125b-1	Nätt et al., 2019
hsa-miR-125b-1-3p	Xu H et al., 2020
	Ingerslev et al., 2018
hsa-miR-125b-2	Nätt et al., 2019
hsa-miR-125b-2-3p	Pantano et al., 2015
	Xu H et al., 2020
	Hua et al., 2019
	Ingerslev et al., 2018
hsa-miR-125b-5p	Pantano et al., 2015
	Schuster et al., 2016
	Xu H et al., 2020
	Hua et al., 2019
	Ingerslev et al., 2018
hsa-miR-126	Nätt et al., 2019
hsa-miR-1260a	Schuster et al., 2016
hsa-miR-1260b	Schuster et al., 2016
	Xu H et al., 2020
	Hua et al., 2019
hsa-miR-1262	Xu H et al., 2020
hsa-miR-1263	Xu H et al., 2020
	Hua et al., 2019
hsa-miR-126-3p	Pantano et al., 2015
	Schuster et al., 2016
	Xu H et al., 2020
	Hua et al., 2019
	Ingerslev et al., 2018
hsa-miR-1265	Xu H et al., 2020
hsa-miR-126-5p	Pantano et al., 2015
	Schuster et al., 2016
	Xu H et al., 2020
	Hua et al., 2019
	Ingerslev et al., 2018
hsa-miR-1268a	Pantano et al., 2015
hsa-miR-1268b	Pantano et al., 2015
	Schuster et al., 2016
hsa-miR-127	Nätt et al., 2019
hsa-miR-1271-5p	Xu H et al., 2020
	Hua et al., 2019
hsa-miR-1273a	Nätt et al., 2019
hsa-miR-1273c	Xu H et al., 2020
hsa-miR-1273e	Ingerslev et al., 2018
hsa-miR-1273f	Ingerslev et al., 2018
hsa-miR-1273g-3p	Pantano et al., 2015
	Ingerslev et al., 2018
hsa-miR-1273h-5p	Ingerslev et al., 2018
hsa-miR-127-3p	Pantano et al., 2015
	Xu H et al., 2020
	Hua et al., 2019
	Ingerslev et al., 2018
hsa-miR-1275	Schuster et al., 2016
	Xu H et al., 2020
	Ingerslev et al., 2018
hsa-miR-127-5p	Pantano et al., 2015
	Xu H et al., 2020
hsa-miR-1276	Xu H et al., 2020
hsa-miR-1277-3p	Xu H et al., 2020
hsa-miR-1278	Nätt et al., 2019
	Xu H et al., 2020
	Ingerslev et al., 2018
hsa-miR-128	Pantano et al., 2015
	Xu H et al., 2020
hsa-miR-128-1	Nätt et al., 2019
hsa-miR-1282	Ingerslev et al., 2018
hsa-miR-128-2	Nätt et al., 2019
hsa-miR-1283	Schuster et al., 2016
	Xu H et al., 2020
	Hua et al., 2019
	Ingerslev et al., 2018
hsa-miR-1283-1	Nätt et al., 2019
hsa-miR-1283-2	Nätt et al., 2019
hsa-miR-128-3p	Schuster et al., 2016
	Hua et al., 2019
	Ingerslev et al., 2018
hsa-miR-1284	Xu H et al., 2020
hsa-miR-1285-3p	Pantano et al., 2015
	Xu H et al., 2020
	Hua et al., 2019
	Ingerslev et al., 2018
hsa-miR-1285-5p	Hua et al., 2019
hsa-miR-1287	Xu H et al., 2020
hsa-miR-1287-5p	Hua et al., 2019
	Ingerslev et al., 2018
hsa-miR-1288-5p	Ingerslev et al., 2018
hsa-miR-1289	Xu H et al., 2020
hsa-miR-1290	Pantano et al., 2015
hsa-miR-1291	Nätt et al., 2019
	Pantano et al., 2015
	Xu H et al., 2020
	Ingerslev et al., 2018
hsa-miR-129-1-3p	Xu H et al., 2020
hsa-miR-129-2-3p	Xu H et al., 2020
hsa-miR-1294	Xu H et al., 2020
hsa-miR-1295a	Xu H et al., 2020
	Hua et al., 2019
	Ingerslev et al., 2018
hsa-miR-129-5p	Pantano et al., 2015
	Xu H et al., 2020
	Ingerslev et al., 2018
hsa-miR-1296	Xu H et al., 2020
hsa-miR-1296-5p	Hua et al., 2019
	Ingerslev et al., 2018
hsa-miR-1298	Xu H et al., 2020
hsa-miR-1299	Xu H et al., 2020
	Ingerslev et al., 2018
hsa-miR-1301	Xu H et al., 2020
hsa-miR-1301-3p	Hua et al., 2019
	Ingerslev et al., 2018
hsa-miR-1303	Xu H et al., 2020
	Ingerslev et al., 2018
hsa-miR-1304-3p	Xu H et al., 2020
hsa-miR-1306-3p	Pantano et al., 2015
	Ingerslev et al., 2018
hsa-miR-1306-5p	Pantano et al., 2015
	Schuster et al., 2016
	Xu H et al., 2020
	Ingerslev et al., 2018
hsa-miR-1307	Nätt et al., 2019
hsa-miR-1307-3p	Pantano et al., 2015
	Xu H et al., 2020
	Hua et al., 2019
	Ingerslev et al., 2018
hsa-miR-1307-5p	Pantano et al., 2015
	Xu H et al., 2020
	Hua et al., 2019
	Ingerslev et al., 2018
hsa-miR-130a-3p	Pantano et al., 2015
	Schuster et al., 2016
	Xu H et al., 2020
	Hua et al., 2019
	Ingerslev et al., 2018
hsa-miR-130b	Nätt et al., 2019
hsa-miR-130b-3p	Pantano et al., 2015
	Schuster et al., 2016
	Xu H et al., 2020
	Hua et al., 2019
	Ingerslev et al., 2018
hsa-miR-130b-5p	Schuster et al., 2016
	Xu H et al., 2020
	Hua et al., 2019
	Ingerslev et al., 2018
hsa-miR-132	Nätt et al., 2019
hsa-miR-1323	Krawetz et al., 2011
	Nätt et al., 2019
	Pantano et al., 2015
	Schuster et al., 2016
	Xu H et al., 2020
	Hua et al., 2019
	Ingerslev et al., 2018
hsa-miR-132-3p	Pantano et al., 2015
	Schuster et al., 2016
	Xu H et al., 2020
	Hua et al., 2019
	Ingerslev et al., 2018
hsa-miR-132-5p	Pantano et al., 2015
	Schuster et al., 2016
	Xu H et al., 2020
	Hua et al., 2019
	Ingerslev et al., 2018
hsa-miR-133a	Xu H et al., 2020
hsa-miR-133b	Xu H et al., 2020
hsa-miR-134	Pantano et al., 2015
	Xu H et al., 2020
hsa-miR-1343-3p	Ingerslev et al., 2018
hsa-miR-1343-5p	Schuster et al., 2016
hsa-miR-134-5p	Ingerslev et al., 2018
hsa-miR-135a-1	Nätt et al., 2019
hsa-miR-135a-2	Krawetz et al., 2011
	Nätt et al., 2019
hsa-miR-135a-2-3p	Hua et al., 2019
hsa-miR-135a-3p	Xu H et al., 2020
hsa-miR-135a-5p	Pantano et al., 2015
	Schuster et al., 2016
	Xu H et al., 2020
	Hua et al., 2019
	Ingerslev et al., 2018
hsa-miR-135b-5p	Schuster et al., 2016
	Xu H et al., 2020
	Hua et al., 2019
	Ingerslev et al., 2018
hsa-miR-136-3p	Xu H et al., 2020
	Hua et al., 2019
	Ingerslev et al., 2018
hsa-miR-136-5p	Xu H et al., 2020
hsa-miR-138-5p	Pantano et al., 2015
	Schuster et al., 2016
	Xu H et al., 2020
hsa-miR-139	Nätt et al., 2019
hsa-miR-139-3p	Pantano et al., 2015
	Xu H et al., 2020
	Ingerslev et al., 2018
hsa-miR-139-5p	Schuster et al., 2016
	Xu H et al., 2020
	Hua et al., 2019
	Ingerslev et al., 2018
hsa-miR-1-3p	Schuster et al., 2016
	Hua et al., 2019
	Ingerslev et al., 2018
hsa-miR-140	Krawetz et al., 2011
	Nätt et al., 2019
hsa-miR-140-3p	Pantano et al., 2015
	Schuster et al., 2016
	Xu H et al., 2020
	Hua et al., 2019
	Ingerslev et al., 2018
hsa-miR-140-5p	Pantano et al., 2015
	Schuster et al., 2016
	Xu H et al., 2020
	Hua et al., 2019
	Ingerslev et al., 2018
hsa-miR-141	Nätt et al., 2019
hsa-miR-141-3p	Pantano et al., 2015
	Schuster et al., 2016
	Xu H et al., 2020
	Hua et al., 2019
	Ingerslev et al., 2018
hsa-miR-141-5p	Xu H et al., 2020
	Ingerslev et al., 2018
hsa-miR-142	Nätt et al., 2019
hsa-miR-142-3p	Pantano et al., 2015
	Schuster et al., 2016
	Xu H et al., 2020
	Hua et al., 2019
	Ingerslev et al., 2018
hsa-miR-142-5p	Pantano et al., 2015
	Xu H et al., 2020
	Hua et al., 2019
	Ingerslev et al., 2018
hsa-miR-143	Nätt et al., 2019
hsa-miR-143-3p	Pantano et al., 2015
	Schuster et al., 2016
	Xu H et al., 2020
	Hua et al., 2019
	Ingerslev et al., 2018
hsa-miR-143-5p	Xu H et al., 2020
hsa-miR-144-3p	Xu H et al., 2020
	Hua et al., 2019
hsa-miR-144-5p	Xu H et al., 2020
hsa-miR-145-3p	Schuster et al., 2016
	Xu H et al., 2020
	Hua et al., 2019
hsa-miR-145-5p	Schuster et al., 2016
	Xu H et al., 2020
	Hua et al., 2019
hsa-miR-1468-5p	Ingerslev et al., 2018
hsa-miR-1469	Schuster et al., 2016
hsa-miR-146a	Nätt et al., 2019
hsa-miR-146a-3p	Xu H et al., 2020
hsa-miR-146a-5p	Pantano et al., 2015
	Schuster et al., 2016
	Xu H et al., 2020
	Hua et al., 2019
	Ingerslev et al., 2018
hsa-miR-146b	Nätt et al., 2019
hsa-miR-146b-3p	Pantano et al., 2015
	Xu H et al., 2020
	Hua et al., 2019
	Ingerslev et al., 2018
hsa-miR-146b-5p	Pantano et al., 2015
	Schuster et al., 2016
	Xu H et al., 2020
	Hua et al., 2019
	Ingerslev et al., 2018
hsa-miR-147b	Nätt et al., 2019
	Ingerslev et al., 2018
hsa-miR-147b-5p	Hua et al., 2019
hsa-miR-148a	Krawetz et al., 2011
	Nätt et al., 2019
hsa-miR-148a-3p	Pantano et al., 2015
	Schuster et al., 2016
	Xu H et al., 2020
	Hua et al., 2019
	Ingerslev et al., 2018
hsa-miR-148a-5p	Pantano et al., 2015
	Xu H et al., 2020
	Hua et al., 2019
	Ingerslev et al., 2018
hsa-miR-148b	Nätt et al., 2019
hsa-miR-148b-3p	Pantano et al., 2015
	Schuster et al., 2016
	Xu H et al., 2020
	Hua et al., 2019
	Ingerslev et al., 2018
hsa-miR-148b-5p	Pantano et al., 2015
	Xu H et al., 2020
	Ingerslev et al., 2018
hsa-miR-149	Nätt et al., 2019
hsa-miR-149-3p	Schuster et al., 2016
hsa-miR-149-5p	Pantano et al., 2015
	Schuster et al., 2016
	Xu H et al., 2020
	Hua et al., 2019
	Ingerslev et al., 2018
hsa-miR-150	Nätt et al., 2019
hsa-miR-150-5p	Schuster et al., 2016
	Xu H et al., 2020
	Hua et al., 2019
	Ingerslev et al., 2018
hsa-miR-151a	Nätt et al., 2019
hsa-miR-151a-3p	Pantano et al., 2015
	Xu H et al., 2020
	Hua et al., 2019
	Ingerslev et al., 2018
hsa-miR-151a-5p	Pantano et al., 2015
	Schuster et al., 2016
	Xu H et al., 2020
	Hua et al., 2019
	Ingerslev et al., 2018
hsa-miR-151b	Nätt et al., 2019
	Pantano et al., 2015
	Xu H et al., 2020
	Hua et al., 2019
hsa-miR-152	Krawetz et al., 2011
	Nätt et al., 2019
	Pantano et al., 2015
	Xu H et al., 2020
hsa-miR-152-3p	Schuster et al., 2016
	Hua et al., 2019
	Ingerslev et al., 2018
hsa-miR-153	Xu H et al., 2020
hsa-miR-153-1	Nätt et al., 2019
hsa-miR-153-2	Nätt et al., 2019
hsa-miR-153-3p	Schuster et al., 2016
	Hua et al., 2019
	Ingerslev et al., 2018
	Xu H et al., 2020
	Hua et al., 2019
hsa-miR-154-5p	Xu H et al., 2020
hsa-miR-155	Nätt et al., 2019
hsa-miR-155-3p	Xu H et al., 2020
hsa-miR-155-5p	Pantano et al., 2015
	Schuster et al., 2016
	Xu H et al., 2020
	Hua et al., 2019
	Ingerslev et al., 2018
hsa-miR-1587	Schuster et al., 2016
	Ingerslev et al., 2018
hsa-miR-15a-5p	Pantano et al., 2015
	Schuster et al., 2016
	Xu H et al., 2020
	Hua et al., 2019
	Ingerslev et al., 2018
hsa-miR-15b	Nätt et al., 2019
hsa-miR-15b-3p	Schuster et al., 2016
	Xu H et al., 2020
	Hua et al., 2019
	Ingerslev et al., 2018
hsa-miR-15b-5p	Pantano et al., 2015
	Schuster et al., 2016
	Xu H et al., 2020
	Hua et al., 2019
	Ingerslev et al., 2018
hsa-miR-16-1	Nätt et al., 2019
hsa-miR-16-2	Nätt et al., 2019
hsa-miR-16-2-3p	Pantano et al., 2015
	Xu H et al., 2020
	Hua et al., 2019
	Ingerslev et al., 2018
hsa-miR-16-5p	Pantano et al., 2015
	Schuster et al., 2016
	Xu H et al., 2020
	Hua et al., 2019
	Ingerslev et al., 2018
hsa-miR-17	Nätt et al., 2019
hsa-miR-17-3p	Schuster et al., 2016
	Xu H et al., 2020
	Hua et al., 2019
	Ingerslev et al., 2018
hsa-miR-17-5p	Pantano et al., 2015
	Schuster et al., 2016
	Xu H et al., 2020
	Hua et al., 2019
	Ingerslev et al., 2018
hsa-miR-181a-1	Nätt et al., 2019
hsa-miR-181a-2	Nätt et al., 2019
hsa-miR-181a-2-3p	Pantano et al., 2015
	Xu H et al., 2020
	Hua et al., 2019
	Ingerslev et al., 2018
hsa-miR-181a-3p	Xu H et al., 2020
	Hua et al., 2019
	Ingerslev et al., 2018
hsa-miR-181a-5p	Pantano et al., 2015
	Schuster et al., 2016
	Xu H et al., 2020
	Hua et al., 2019
	Ingerslev et al., 2018
hsa-miR-181b-3p	Xu H et al., 2020
hsa-miR-181b-5p	Pantano et al., 2015
	Xu H et al., 2020
	Hua et al., 2019
	Ingerslev et al., 2018
hsa-miR-181c-3p	Xu H et al., 2020
	Hua et al., 2019
	Ingerslev et al., 2018
hsa-miR-181c-5p	Pantano et al., 2015
	Schuster et al., 2016
	Xu H et al., 2020
	Hua et al., 2019
	Ingerslev et al., 2018
hsa-miR-181d	Nätt et al., 2019
	Pantano et al., 2015
	Xu H et al., 2020
hsa-miR-181d-5p	Hua et al., 2019
	Ingerslev et al., 2018
hsa-miR-182	Nätt et al., 2019
hsa-miR-182-3p	Xu H et al., 2020
	Hua et al., 2019
	Ingerslev et al., 2018
hsa-miR-182-5p	Pantano et al., 2015
	Schuster et al., 2016
	Xu H et al., 2020
	Hua et al., 2019
	Ingerslev et al., 2018
hsa-miR-183	Nätt et al., 2019
hsa-miR-183-5p	Pantano et al., 2015
	Schuster et al., 2016
	Xu H et al., 2020
	Hua et al., 2019
	Ingerslev et al., 2018
hsa-miR-184	Krawetz et al., 2011
	Nätt et al., 2019
	Pantano et al., 2015
	Schuster et al., 2016
	Xu H et al., 2020
	Hua et al., 2019
	Ingerslev et al., 2018
hsa-miR-1843	Hua et al., 2019
hsa-miR-185	Krawetz et al., 2011
	Nätt et al., 2019
hsa-miR-185-3p	Xu H et al., 2020
	Ingerslev et al., 2018
hsa-miR-185-5p	Pantano et al., 2015
	Schuster et al., 2016
	Xu H et al., 2020
	Hua et al., 2019
	Ingerslev et al., 2018
hsa-miR-186	Nätt et al., 2019
hsa-miR-186-5p	Pantano et al., 2015
	Schuster et al., 2016
	Xu H et al., 2020
	Hua et al., 2019
	Ingerslev et al., 2018
hsa-miR-187-3p	Xu H et al., 2020
	Hua et al., 2019
	Ingerslev et al., 2018
hsa-miR-187-5p	Xu H et al., 2020
	Ingerslev et al., 2018
hsa-miR-188-3p	Xu H et al., 2020
hsa-miR-188-5p	Xu H et al., 2020
hsa-miR-18a-3p	Xu H et al., 2020
	Ingerslev et al., 2018
hsa-miR-18a-5p	Pantano et al., 2015
	Schuster et al., 2016
	Xu H et al., 2020
	Hua et al., 2019
hsa-miR-1908	Xu H et al., 2020
hsa-miR-1908-3p	Schuster et al., 2016
hsa-miR-1908-5p	Ingerslev et al., 2018
hsa-miR-190a	Pantano et al., 2015
	Xu H et al., 2020
hsa-miR-190a-5p	Hua et al., 2019
hsa-miR-190b	Nätt et al., 2019
	Pantano et al., 2015
	Schuster et al., 2016
	Xu H et al., 2020
	Ingerslev et al., 2018
hsa-miR-190b-5p	Hua et al., 2019
hsa-miR-191	Krawetz et al., 2011
	Nätt et al., 2019
hsa-miR-1911-5p	Xu H et al., 2020
hsa-miR-1912	Xu H et al., 2020
hsa-miR-191-3p	Xu H et al., 2020
hsa-miR-1915-3p	Ingerslev et al., 2018
hsa-miR-191-5p	Pantano et al., 2015
	Schuster et al., 2016
	Xu H et al., 2020
	Hua et al., 2019
	Ingerslev et al., 2018
hsa-miR-192	Krawetz et al., 2011
	Nätt et al., 2019
hsa-miR-192-3p	Xu H et al., 2020
hsa-miR-192-5p	Pantano et al., 2015
	Schuster et al., 2016
	Xu H et al., 2020
	Hua et al., 2019
	Ingerslev et al., 2018
hsa-miR-193a	Nätt et al., 2019
hsa-miR-193a-3p	Ingerslev et al., 2018
hsa-miR-193a-5p	Pantano et al., 2015
	Schuster et al., 2016
	Xu H et al., 2020
	Hua et al., 2019
	Ingerslev et al., 2018
hsa-miR-193b	Nätt et al., 2019
hsa-miR-193b-3p	Xu H et al., 2020
	Hua et al., 2019
	Ingerslev et al., 2018
hsa-miR-193b-5p	Xu H et al., 2020
	Hua et al., 2019
	Ingerslev et al., 2018
hsa-miR-194-1	Nätt et al., 2019
hsa-miR-194-2	Nätt et al., 2019
hsa-miR-194-3p	Ingerslev et al., 2018
hsa-miR-194-5p	Pantano et al., 2015
	Schuster et al., 2016
	Xu H et al., 2020
	Hua et al., 2019
	Ingerslev et al., 2018
hsa-miR-195-3p	Xu H et al., 2020
	Ingerslev et al., 2018
hsa-miR-195-5p	Schuster et al., 2016
	Xu H et al., 2020
	Hua et al., 2019
	Ingerslev et al., 2018
hsa-miR-196a-5p	Pantano et al., 2015
	Schuster et al., 2016
	Xu H et al., 2020
	Hua et al., 2019
	Ingerslev et al., 2018
hsa-miR-196b	Nätt et al., 2019
hsa-miR-196b-3p	Ingerslev et al., 2018
hsa-miR-196b-5p	Pantano et al., 2015
	Xu H et al., 2020
	Hua et al., 2019
	Ingerslev et al., 2018
hsa-miR-197	Nätt et al., 2019
hsa-miR-1972	Ingerslev et al., 2018
hsa-miR-1973	Ingerslev et al., 2018
hsa-miR-197-3p	Schuster et al., 2016
	Xu H et al., 2020
	Hua et al., 2019
	Ingerslev et al., 2018
hsa-miR-1976	Ingerslev et al., 2018
hsa-miR-199a-1	Nätt et al., 2019
hsa-miR-199a-2	Nätt et al., 2019
hsa-miR-199a-3p	Pantano et al., 2015
	Schuster et al., 2016
	Xu H et al., 2020
	Hua et al., 2019
	Ingerslev et al., 2018
hsa-miR-199a-5p	Pantano et al., 2015
	Schuster et al., 2016
	Xu H et al., 2020
	Hua et al., 2019
hsa-miR-199b	Nätt et al., 2019
hsa-miR-199b-3p	Pantano et al., 2015
	Xu H et al., 2020
	Hua et al., 2019
hsa-miR-199b-5p	Xu H et al., 2020
	Hua et al., 2019
	Ingerslev et al., 2018
hsa-miR-19a	Nätt et al., 2019
hsa-miR-19a-3p	Pantano et al., 2015
	Schuster et al., 2016
	Xu H et al., 2020
	Hua et al., 2019
	Ingerslev et al., 2018
hsa-miR-19b-1	Nätt et al., 2019
hsa-miR-19b-2	Nätt et al., 2019
hsa-miR-19b-3p	Pantano et al., 2015
	Schuster et al., 2016
	Xu H et al., 2020
	Hua et al., 2019
	Ingerslev et al., 2018
hsa-miR-200a	Krawetz et al., 2011
	Nätt et al., 2019
hsa-miR-200a-3p	Pantano et al., 2015
	Schuster et al., 2016
	Xu H et al., 2020
	Hua et al., 2019
	Ingerslev et al., 2018
hsa-miR-200a-5p	Xu H et al., 2020
	Hua et al., 2019
	Ingerslev et al., 2018
hsa-miR-200b	Nätt et al., 2019
hsa-miR-200b-3p	Pantano et al., 2015
	Schuster et al., 2016
	Xu H et al., 2020
	Hua et al., 2019
	Ingerslev et al., 2018
hsa-miR-200b-5p	Pantano et al., 2015
	Xu H et al., 2020
	Hua et al., 2019
	Ingerslev et al., 2018
hsa-miR-200c	Nätt et al., 2019
hsa-miR-200c-3p	Pantano et al., 2015
	Schuster et al., 2016
	Xu H et al., 2020
	Hua et al., 2019
	Ingerslev et al., 2018
hsa-miR-200c-5p	Ingerslev et al., 2018
hsa-miR-202-3p	Xu H et al., 2020
	Hua et al., 2019
	Ingerslev et al., 2018
hsa-miR-202-5p	Pantano et al., 2015
	Xu H et al., 2020
	Hua et al., 2019
	Ingerslev et al., 2018
hsa-miR-203a	Nätt et al., 2019
	Pantano et al., 2015
	Xu H et al., 2020
hsa-miR-203a-3p	Schuster et al., 2016
	Hua et al., 2019
	Ingerslev et al., 2018
hsa-miR-203b-3p	Pantano et al., 2015
	Xu H et al., 2020
	Hua et al., 2019
	Ingerslev et al., 2018
hsa-miR-203b-5p	Hua et al., 2019
	Ingerslev et al., 2018
hsa-miR-204	Nätt et al., 2019
hsa-miR-204-3p	Xu H et al., 2020
	Ingerslev et al., 2018
hsa-miR-204-5p	Pantano et al., 2015
	Schuster et al., 2016
	Xu H et al., 2020
	Hua et al., 2019
	Ingerslev et al., 2018
hsa-miR-205	Nätt et al., 2019
hsa-miR-205-5p	Pantano et al., 2015
	Schuster et al., 2016
	Xu H et al., 2020
	Hua et al., 2019
	Ingerslev et al., 2018
hsa-miR-206	Xu H et al., 2020
hsa-miR-20a	Nätt et al., 2019
hsa-miR-20a-3p	Xu H et al., 2020
	Hua et al., 2019
hsa-miR-20a-5p	Pantano et al., 2015
	Schuster et al., 2016
	Xu H et al., 2020
	Hua et al., 2019
	Ingerslev et al., 2018
hsa-miR-20b	Nätt et al., 2019
hsa-miR-20b-3p	Xu H et al., 2020
	Ingerslev et al., 2018
hsa-miR-20b-5p	Pantano et al., 2015
	Schuster et al., 2016
	Xu H et al., 2020
	Hua et al., 2019
	Ingerslev et al., 2018
hsa-miR-21	Krawetz et al., 2011
	Nätt et al., 2019
hsa-miR-210	Xu H et al., 2020
hsa-miR-210-3p	Hua et al., 2019
	Ingerslev et al., 2018
hsa-miR-210-5p	Ingerslev et al., 2018
hsa-miR-2110	Nätt et al., 2019
	Pantano et al., 2015
	Schuster et al., 2016
	Xu H et al., 2020
	Hua et al., 2019
	Ingerslev et al., 2018
hsa-miR-2115-3p	Xu H et al., 2020
hsa-miR-2115-5p	Xu H et al., 2020
hsa-miR-211-5p	Xu H et al., 2020
hsa-miR-212	Nätt et al., 2019
hsa-miR-212-3p	Pantano et al., 2015
	Schuster et al., 2016
	Xu H et al., 2020
	Hua et al., 2019
	Ingerslev et al., 2018
hsa-miR-212-5p	Pantano et al., 2015
	Xu H et al., 2020
	Hua et al., 2019
	Ingerslev et al., 2018
hsa-miR-21-3p	Xu H et al., 2020
	Hua et al., 2019
	Ingerslev et al., 2018
hsa-miR-214-3p	Schuster et al., 2016
hsa-miR-215	Nätt et al., 2019
	Pantano et al., 2015
	Xu H et al., 2020
hsa-miR-215-3p	Schuster et al., 2016
	Hua et al., 2019
hsa-miR-215-5p	Schuster et al., 2016
	Hua et al., 2019
	Ingerslev et al., 2018
hsa-miR-21-5p	Pantano et al., 2015
	Schuster et al., 2016
	Xu H et al., 2020
	Hua et al., 2019
	Ingerslev et al., 2018
hsa-miR-216a-5p	Xu H et al., 2020
	Hua et al., 2019
hsa-miR-216b	Pantano et al., 2015
	Xu H et al., 2020
hsa-miR-216b-5p	Schuster et al., 2016
	Hua et al., 2019
	Ingerslev et al., 2018
hsa-miR-217	Pantano et al., 2015
	Xu H et al., 2020
	Ingerslev et al., 2018
hsa-miR-217-5p	Hua et al., 2019
hsa-miR-218-1	Nätt et al., 2019
hsa-miR-218-2	Nätt et al., 2019
hsa-miR-218-5p	Pantano et al., 2015
	Schuster et al., 2016
	Xu H et al., 2020
	Hua et al., 2019
	Ingerslev et al., 2018
hsa-miR-219-2-3p	Pantano et al., 2015
	Xu H et al., 2020
hsa-miR-219-5p	Xu H et al., 2020
hsa-miR-219a-2	Nätt et al., 2019
hsa-miR-22	Krawetz et al., 2011
	Nätt et al., 2019
hsa-miR-221	Krawetz et al., 2011
	Nätt et al., 2019
hsa-miR-221-3p	Pantano et al., 2015
	Schuster et al., 2016
	Xu H et al., 2020
	Hua et al., 2019
	Ingerslev et al., 2018
hsa-miR-221-5p	Xu H et al., 2020
	Hua et al., 2019
	Ingerslev et al., 2018
hsa-miR-222	Nätt et al., 2019
hsa-miR-222-3p	Schuster et al., 2016
	Xu H et al., 2020
	Hua et al., 2019
	Ingerslev et al., 2018
hsa-miR-222-5p	Xu H et al., 2020
hsa-miR-223	Nätt et al., 2019
hsa-miR-223-3p	Schuster et al., 2016
	Xu H et al., 2020
	Hua et al., 2019
	Ingerslev et al., 2018
hsa-miR-223-5p	Xu H et al., 2020
	Hua et al., 2019
	Ingerslev et al., 2018
hsa-miR-22-3p	Pantano et al., 2015
	Schuster et al., 2016
	Xu H et al., 2020
	Hua et al., 2019
	Ingerslev et al., 2018
hsa-miR-224	Nätt et al., 2019
hsa-miR-224-3p	Xu H et al., 2020
hsa-miR-224-5p	Xu H et al., 2020
	Hua et al., 2019
	Ingerslev et al., 2018
hsa-miR-22-5p	Schuster et al., 2016
	Xu H et al., 2020
	Hua et al., 2019
	Ingerslev et al., 2018
hsa-miR-2277-3p	Xu H et al., 2020
hsa-miR-2277-5p	Xu H et al., 2020
	Ingerslev et al., 2018
hsa-miR-2278	Xu H et al., 2020
hsa-miR-2355-3p	Xu H et al., 2020
hsa-miR-2355-5p	Xu H et al., 2020
	Hua et al., 2019
	Ingerslev et al., 2018
hsa-miR-2392	Schuster et al., 2016
	Ingerslev et al., 2018
hsa-miR-23a	Krawetz et al., 2011
	Nätt et al., 2019
hsa-miR-23a-3p	Pantano et al., 2015
	Schuster et al., 2016
	Xu H et al., 2020
	Hua et al., 2019
	Ingerslev et al., 2018
hsa-miR-23a-5p	Xu H et al., 2020
hsa-miR-23b	Nätt et al., 2019
hsa-miR-23b-3p	Pantano et al., 2015
	Schuster et al., 2016
	Xu H et al., 2020
	Hua et al., 2019
	Ingerslev et al., 2018
hsa-miR-23b-5p	Xu H et al., 2020
	Hua et al., 2019
	Ingerslev et al., 2018
hsa-miR-23c	Schuster et al., 2016
hsa-miR-24-1	Nätt et al., 2019
hsa-miR-24-1-5p	Xu H et al., 2020
	Ingerslev et al., 2018
hsa-miR-24-2	Nätt et al., 2019
hsa-miR-24-2-5p	Xu H et al., 2020
	Ingerslev et al., 2018
hsa-miR-24-3p	Pantano et al., 2015
	Schuster et al., 2016
	Xu H et al., 2020
	Hua et al., 2019
	Ingerslev et al., 2018
hsa-miR-2467-5p	Xu H et al., 2020
hsa-miR-25	Krawetz et al., 2011
	Nätt et al., 2019
hsa-miR-25-3p	Pantano et al., 2015
	Schuster et al., 2016
	Xu H et al., 2020
	Hua et al., 2019
	Ingerslev et al., 2018
hsa-miR-25-5p	Xu H et al., 2020
	Hua et al., 2019
	Ingerslev et al., 2018
hsa-miR-2681-3p	Pantano et al., 2015
	Xu H et al., 2020
hsa-miR-2681-5p	Ingerslev et al., 2018
hsa-miR-26a-1	Nätt et al., 2019
hsa-miR-26a-1-3p	Xu H et al., 2020
	Ingerslev et al., 2018
hsa-miR-26a-2	Nätt et al., 2019
hsa-miR-26a-2-3p	Xu H et al., 2020
	Ingerslev et al., 2018
hsa-miR-26a-5p	Pantano et al., 2015
	Schuster et al., 2016
	Xu H et al., 2020
	Hua et al., 2019
	Ingerslev et al., 2018
hsa-miR-26b	Nätt et al., 2019
hsa-miR-26b-3p	Xu H et al., 2020
	Hua et al., 2019
	Ingerslev et al., 2018
hsa-miR-26b-5p	Pantano et al., 2015
	Schuster et al., 2016
	Xu H et al., 2020
	Hua et al., 2019
	Ingerslev et al., 2018
hsa-miR-27a	Nätt et al., 2019
hsa-miR-27a-3p	Pantano et al., 2015
	Schuster et al., 2016
	Xu H et al., 2020
	Hua et al., 2019
	Ingerslev et al., 2018
hsa-miR-27a-5p	Xu H et al., 2020
	Hua et al., 2019
	Ingerslev et al., 2018
hsa-miR-27b	Krawetz et al., 2011
	Nätt et al., 2019
hsa-miR-27b-3p	Pantano et al., 2015
	Schuster et al., 2016
	Xu H et al., 2020
	Hua et al., 2019
	Ingerslev et al., 2018
hsa-miR-27b-5p	Xu H et al., 2020
	Ingerslev et al., 2018
hsa-miR-28	Nätt et al., 2019
hsa-miR-28-3p	Pantano et al., 2015
	Schuster et al., 2016
	Xu H et al., 2020
	Hua et al., 2019
	Ingerslev et al., 2018
hsa-miR-28-5p	Pantano et al., 2015
	Schuster et al., 2016
	Xu H et al., 2020
	Hua et al., 2019
	Ingerslev et al., 2018
hsa-miR-296	Nätt et al., 2019
hsa-miR-296-3p	Xu H et al., 2020
	Ingerslev et al., 2018
hsa-miR-2964a-3p	Xu H et al., 2020
hsa-miR-2964a-5p	Xu H et al., 2020
hsa-miR-296-5p	Pantano et al., 2015
	Schuster et al., 2016
	Xu H et al., 2020
	Hua et al., 2019
	Ingerslev et al., 2018
hsa-miR-299-3p	Pantano et al., 2015
hsa-miR-299-5p	Xu H et al., 2020
hsa-miR-29a	Nätt et al., 2019
hsa-miR-29a-3p	Pantano et al., 2015
	Schuster et al., 2016
	Xu H et al., 2020
	Hua et al., 2019
	Ingerslev et al., 2018
hsa-miR-29a-5p	Xu H et al., 2020
hsa-miR-29b-1	Nätt et al., 2019
hsa-miR-29b-1-5p	Xu H et al., 2020
hsa-miR-29b-2	Nätt et al., 2019
hsa-miR-29b-2-5p	Xu H et al., 2020
	Hua et al., 2019
	Ingerslev et al., 2018
hsa-miR-29b-3p	Schuster et al., 2016
	Xu H et al., 2020
	Hua et al., 2019
	Ingerslev et al., 2018
hsa-miR-29c-3p	Pantano et al., 2015
	Schuster et al., 2016
	Xu H et al., 2020
	Hua et al., 2019
	Ingerslev et al., 2018
hsa-miR-29c-5p	Schuster et al., 2016
	Xu H et al., 2020
	Hua et al., 2019
	Ingerslev et al., 2018
hsa-miR-301a-3p	Schuster et al., 2016
	Xu H et al., 2020
hsa-miR-301a-5p	Xu H et al., 2020
hsa-miR-301b	Xu H et al., 2020
hsa-miR-302a-5p	Ingerslev et al., 2018
hsa-miR-3064-3p	Ingerslev et al., 2018
hsa-miR-3064-5p	Ingerslev et al., 2018
hsa-miR-3065-3p	Xu H et al., 2020
	Hua et al., 2019
	Ingerslev et al., 2018
hsa-miR-3065-5p	Xu H et al., 2020
	Hua et al., 2019
	Ingerslev et al., 2018
hsa-miR-3074-3p	Xu H et al., 2020
	Hua et al., 2019
	Ingerslev et al., 2018
hsa-miR-3074-5p	Pantano et al., 2015
	Xu H et al., 2020
	Hua et al., 2019
	Ingerslev et al., 2018
hsa-miR-30a	Krawetz et al., 2011
	Nätt et al., 2019
hsa-miR-30a-3p	Pantano et al., 2015
	Schuster et al., 2016
	Xu H et al., 2020
	Hua et al., 2019
	Ingerslev et al., 2018
hsa-miR-30a-5p	Pantano et al., 2015
	Schuster et al., 2016
	Xu H et al., 2020
	Hua et al., 2019
	Ingerslev et al., 2018
hsa-miR-30b	Nätt et al., 2019
hsa-miR-30b-3p	Xu H et al., 2020
	Hua et al., 2019
	Ingerslev et al., 2018
hsa-miR-30b-5p	Pantano et al., 2015
	Schuster et al., 2016
	Xu H et al., 2020
	Hua et al., 2019
	Ingerslev et al., 2018
hsa-miR-30c-1	Nätt et al., 2019
hsa-miR-30c-1-3p	Xu H et al., 2020
	Hua et al., 2019
	Ingerslev et al., 2018
hsa-miR-30c-2	Nätt et al., 2019
hsa-miR-30c-2-3p	Xu H et al., 2020
	Hua et al., 2019
	Ingerslev et al., 2018
hsa-miR-30c-5p	Pantano et al., 2015
	Schuster et al., 2016
	Xu H et al., 2020
	Hua et al., 2019
	Ingerslev et al., 2018
hsa-miR-30d	Nätt et al., 2019
hsa-miR-30d-3p	Xu H et al., 2020
	Hua et al., 2019
	Ingerslev et al., 2018
hsa-miR-30d-5p	Pantano et al., 2015
	Schuster et al., 2016
	Xu H et al., 2020
	Hua et al., 2019
	Ingerslev et al., 2018
hsa-miR-30e	Krawetz et al., 2011
	Nätt et al., 2019
hsa-miR-30e-3p	Pantano et al., 2015
	Schuster et al., 2016
	Xu H et al., 2020
	Hua et al., 2019
	Ingerslev et al., 2018
hsa-miR-30e-5p	Pantano et al., 2015
	Schuster et al., 2016
	Xu H et al., 2020
	Hua et al., 2019
	Ingerslev et al., 2018
hsa-miR-31	Krawetz et al., 2011
	Nätt et al., 2019
hsa-miR-3120-3p	Xu H et al., 2020
hsa-miR-3121-3p	Xu H et al., 2020
hsa-miR-3122	Ingerslev et al., 2018
hsa-miR-3124-5p	Ingerslev et al., 2018
hsa-miR-3127-5p	Pantano et al., 2015
	Xu H et al., 2020
hsa-miR-3129-3p	Xu H et al., 2020
hsa-miR-3130-3p	Xu H et al., 2020
hsa-miR-3133	Pantano et al., 2015
	Xu H et al., 2020
hsa-miR-3135b	Schuster et al., 2016
hsa-miR-3136-3p	Xu H et al., 2020
hsa-miR-31-3p	Schuster et al., 2016
	Xu H et al., 2020
hsa-miR-3140-3p	Xu H et al., 2020
hsa-miR-3140-5p	Xu H et al., 2020
hsa-miR-3144-3p	Xu H et al., 2020
hsa-miR-3144-5p	Pantano et al., 2015
hsa-miR-3145-5p	Xu H et al., 2020
hsa-miR-3148	Xu H et al., 2020
	Hua et al., 2019
	Ingerslev et al., 2018
hsa-miR-3150b-3p	Pantano et al., 2015
	Xu H et al., 2020
hsa-miR-3155a	Ingerslev et al., 2018
hsa-miR-3157-3p	Xu H et al., 2020
hsa-miR-3157-5p	Xu H et al., 2020
hsa-miR-3158-1	Nätt et al., 2019
hsa-miR-3158-2	Nätt et al., 2019
hsa-miR-3158-3p	Pantano et al., 2015
	Xu H et al., 2020
	Ingerslev et al., 2018
hsa-miR-3158-5p	Ingerslev et al., 2018
hsa-miR-31-5p	Pantano et al., 2015
	Schuster et al., 2016
	Xu H et al., 2020
	Hua et al., 2019
	Ingerslev et al., 2018
hsa-miR-3162-3p	Schuster et al., 2016
hsa-miR-3165	Xu H et al., 2020
	Ingerslev et al., 2018
hsa-miR-3173-5p	Xu H et al., 2020
hsa-miR-3174	Xu H et al., 2020
hsa-miR-3175	Xu H et al., 2020
hsa-miR-3178	Nätt et al., 2019
	Pantano et al., 2015
	Ingerslev et al., 2018
hsa-miR-3179	Xu H et al., 2020
hsa-miR-3180	Ingerslev et al., 2018
hsa-miR-3180-5p	Ingerslev et al., 2018
hsa-miR-3182	Nätt et al., 2019
hsa-miR-3184-5p	Hua et al., 2019
	Ingerslev et al., 2018
hsa-miR-3185	Ingerslev et al., 2018
hsa-miR-3188	Ingerslev et al., 2018
hsa-miR-3191-3p	Pantano et al., 2015
hsa-miR-3192-3p	Ingerslev et al., 2018
hsa-miR-3195	Nätt et al., 2019
	Ingerslev et al., 2018
hsa-miR-3196	Nätt et al., 2019
	Schuster et al., 2016
hsa-miR-3198	Ingerslev et al., 2018
hsa-miR-32	Nätt et al., 2019
hsa-miR-3200-3p	Xu H et al., 2020
	Ingerslev et al., 2018
hsa-miR-3200-5p	Xu H et al., 2020
hsa-miR-320a	Krawetz et al., 2011
	Nätt et al., 2019
	Pantano et al., 2015
	Schuster et al., 2016
	Xu H et al., 2020
	Ingerslev et al., 2018
hsa-miR-320a-3p	Hua et al., 2019
hsa-miR-320b	Pantano et al., 2015
	Schuster et al., 2016
	Xu H et al., 2020
	Hua et al., 2019
	Ingerslev et al., 2018
hsa-miR-320b-1	Nätt et al., 2019
hsa-miR-320b-2	Nätt et al., 2019
hsa-miR-320c	Pantano et al., 2015
	Xu H et al., 2020
	Hua et al., 2019
	Ingerslev et al., 2018
hsa-miR-320c-1	Nätt et al., 2019
hsa-miR-320c-2	Nätt et al., 2019
hsa-miR-320d	Pantano et al., 2015
	Xu H et al., 2020
	Ingerslev et al., 2018
hsa-miR-323a-3p	Xu H et al., 2020
	Hua et al., 2019
	Ingerslev et al., 2018
hsa-miR-323b-3p	Xu H et al., 2020
	Hua et al., 2019
	Ingerslev et al., 2018
hsa-miR-32-3p	Xu H et al., 2020
	Hua et al., 2019
	Ingerslev et al., 2018
hsa-miR-324-3p	Xu H et al., 2020
	Ingerslev et al., 2018
hsa-miR-324-5p	Schuster et al., 2016
	Xu H et al., 2020
	Hua et al., 2019
	Ingerslev et al., 2018
hsa-miR-32-5p	Pantano et al., 2015
	Schuster et al., 2016
	Xu H et al., 2020
	Hua et al., 2019
	Ingerslev et al., 2018
hsa-miR-326	Xu H et al., 2020
	Ingerslev et al., 2018
hsa-miR-328	Nätt et al., 2019
	Pantano et al., 2015
	Xu H et al., 2020
hsa-miR-328-3p	Hua et al., 2019
	Ingerslev et al., 2018
hsa-miR-329	Xu H et al., 2020
hsa-miR-329-3p	Hua et al., 2019
hsa-miR-330-3p	Xu H et al., 2020
	Hua et al., 2019
	Ingerslev et al., 2018
hsa-miR-330-5p	Xu H et al., 2020
hsa-miR-331-3p	Xu H et al., 2020
	Hua et al., 2019
	Ingerslev et al., 2018
hsa-miR-331-5p	Ingerslev et al., 2018
hsa-miR-335	Krawetz et al., 2011
	Nätt et al., 2019
hsa-miR-335-3p	Pantano et al., 2015
	Schuster et al., 2016
	Xu H et al., 2020
	Hua et al., 2019
	Ingerslev et al., 2018
hsa-miR-335-5p	Pantano et al., 2015
	Schuster et al., 2016
	Xu H et al., 2020
	Hua et al., 2019
	Ingerslev et al., 2018
hsa-miR-337-3p	Xu H et al., 2020
hsa-miR-337-5p	Xu H et al., 2020
hsa-miR-338	Nätt et al., 2019
hsa-miR-338-3p	Xu H et al., 2020
	Hua et al., 2019
hsa-miR-338-5p	Xu H et al., 2020
	Hua et al., 2019
	Ingerslev et al., 2018
hsa-miR-339	Nätt et al., 2019
hsa-miR-339-3p	Pantano et al., 2015
	Xu H et al., 2020
	Hua et al., 2019
	Ingerslev et al., 2018
hsa-miR-339-5p	Xu H et al., 2020
	Hua et al., 2019
	Ingerslev et al., 2018
hsa-miR-33a-3p	Xu H et al., 2020
hsa-miR-33a-5p	Xu H et al., 2020
hsa-miR-33b-3p	Xu H et al., 2020
hsa-miR-340	Nätt et al., 2019
hsa-miR-340-3p	Pantano et al., 2015
	Schuster et al., 2016
	Xu H et al., 2020
	Hua et al., 2019
	Ingerslev et al., 2018
hsa-miR-340-5p	Pantano et al., 2015
	Schuster et al., 2016
	Xu H et al., 2020
	Hua et al., 2019
	Ingerslev et al., 2018
hsa-miR-342	Nätt et al., 2019
hsa-miR-342-3p	Pantano et al., 2015
	Schuster et al., 2016
	Xu H et al., 2020
	Hua et al., 2019
hsa-miR-342-5p	Xu H et al., 2020
	Hua et al., 2019
	Xu H et al., 2020
	Hua et al., 2019
hsa-miR-34a-3p	Xu H et al., 2020
hsa-miR-34a-5p	Schuster et al., 2016
	Xu H et al., 2020
	Hua et al., 2019
	Ingerslev et al., 2018
hsa-miR-34b	Krawetz et al., 2011
	Nätt et al., 2019
hsa-miR-34b-3p	Pantano et al., 2015
	Schuster et al., 2016
	Xu H et al., 2020
	Hua et al., 2019
	Ingerslev et al., 2018
hsa-miR-34b-5p	Pantano et al., 2015
	Schuster et al., 2016
	Xu H et al., 2020
	Hua et al., 2019
hsa-miR-34c	Krawetz et al., 2011
	Nätt et al., 2019
hsa-miR-34c-3p	Pantano et al., 2015
	Schuster et al., 2016
	Xu H et al., 2020
	Hua et al., 2019
	Ingerslev et al., 2018
hsa-miR-34c-5p	Pantano et al., 2015
	Schuster et al., 2016
	Xu H et al., 2020
	Hua et al., 2019
	Ingerslev et al., 2018
hsa-miR-3529-3p	Ingerslev et al., 2018
hsa-miR-3529-5p	Xu H et al., 2020
hsa-miR-3591-3p	Schuster et al., 2016
	Ingerslev et al., 2018
hsa-miR-3591-5p	Xu H et al., 2020
hsa-miR-3605-3p	Pantano et al., 2015
	Xu H et al., 2020
hsa-miR-3605-5p	Xu H et al., 2020
hsa-miR-3609	Xu H et al., 2020
	Ingerslev et al., 2018
hsa-miR-361	Nätt et al., 2019
hsa-miR-3610	Ingerslev et al., 2018
hsa-miR-3611	Xu H et al., 2020
hsa-miR-3612	Xu H et al., 2020
hsa-miR-3613	Nätt et al., 2019
hsa-miR-3613-3p	Schuster et al., 2016
	Xu H et al., 2020
	Ingerslev et al., 2018
hsa-miR-3613-5p	Pantano et al., 2015
	Xu H et al., 2020
	Hua et al., 2019
	Ingerslev et al., 2018
hsa-miR-361-3p	Xu H et al., 2020
	Hua et al., 2019
	Ingerslev et al., 2018
hsa-miR-3614-3p	Xu H et al., 2020
hsa-miR-3614-5p	Xu H et al., 2020
hsa-miR-3615	Xu H et al., 2020
	Hua et al., 2019
	Ingerslev et al., 2018
hsa-miR-361-5p	Pantano et al., 2015
	Schuster et al., 2016
	Xu H et al., 2020
	Hua et al., 2019
	Ingerslev et al., 2018
hsa-miR-3617-3p	Xu H et al., 2020
hsa-miR-3617-5p	Schuster et al., 2016
	Xu H et al., 2020
	Hua et al., 2019
hsa-miR-3620	Nätt et al., 2019
hsa-miR-3620-5p	Pantano et al., 2015
	Schuster et al., 2016
hsa-miR-362-3p	Xu H et al., 2020
hsa-miR-362-5p	Xu H et al., 2020
	Hua et al., 2019
	Ingerslev et al., 2018
hsa-miR-363	Krawetz et al., 2011
	Nätt et al., 2019
hsa-miR-363-3p	Xu H et al., 2020
	Hua et al., 2019
	Ingerslev et al., 2018
hsa-miR-363-5p	Xu H et al., 2020
	Ingerslev et al., 2018
hsa-miR-3651	Pantano et al., 2015
	Ingerslev et al., 2018
hsa-miR-3653	Pantano et al., 2015
hsa-miR-3653-3p	Ingerslev et al., 2018
hsa-miR-3654	Ingerslev et al., 2018
hsa-miR-3655	Ingerslev et al., 2018
hsa-miR-3656	Nätt et al., 2019
	Pantano et al., 2015
	Schuster et al., 2016
	Ingerslev et al., 2018
hsa-miR-365a-3p	Schuster et al., 2016
	Xu H et al., 2020
	Hua et al., 2019
	Ingerslev et al., 2018
hsa-miR-365a-5p	Xu H et al., 2020
hsa-miR-365b-3p	Xu H et al., 2020
	Hua et al., 2019
hsa-miR-3660	Xu H et al., 2020
hsa-miR-3661	Xu H et al., 2020
hsa-miR-3663	Nätt et al., 2019
hsa-miR-3663-3p	Pantano et al., 2015
	Xu H et al., 2020
	Hua et al., 2019
	Ingerslev et al., 2018
hsa-miR-3663-5p	Pantano et al., 2015
	Xu H et al., 2020
	Hua et al., 2019
	Ingerslev et al., 2018
hsa-miR-3664-3p	Xu H et al., 2020
hsa-miR-3665	Ingerslev et al., 2018
hsa-miR-3674	Pantano et al., 2015
hsa-miR-3676-3p	Xu H et al., 2020
hsa-miR-3676-5p	Pantano et al., 2015
	Xu H et al., 2020
hsa-miR-3678-5p	Ingerslev et al., 2018
hsa-miR-3681-5p	Xu H et al., 2020
hsa-miR-3684	Pantano et al., 2015
hsa-miR-3685	Ingerslev et al., 2018
hsa-miR-3687	Ingerslev et al., 2018
hsa-miR-3688-3p	Xu H et al., 2020
hsa-miR-3689d	Ingerslev et al., 2018
hsa-miR-3690	Pantano et al., 2015
	Xu H et al., 2020
hsa-miR-369-3p	Pantano et al., 2015
	Schuster et al., 2016
	Xu H et al., 2020
	Hua et al., 2019
	Ingerslev et al., 2018
hsa-miR-369-5p	Xu H et al., 2020
	Ingerslev et al., 2018
hsa-miR-370	Xu H et al., 2020
hsa-miR-370-3p	Hua et al., 2019
hsa-miR-371a-3p	Xu H et al., 2020
	Hua et al., 2019
hsa-miR-371a-5p	Pantano et al., 2015
	Xu H et al., 2020
	Hua et al., 2019
hsa-miR-371b-3p	Xu H et al., 2020
	Ingerslev et al., 2018
hsa-miR-371b-5p	Xu H et al., 2020
	Ingerslev et al., 2018
hsa-miR-372	Nätt et al., 2019
	Pantano et al., 2015
	Xu H et al., 2020
hsa-miR-372-3p	Schuster et al., 2016
	Hua et al., 2019
	Ingerslev et al., 2018
hsa-miR-372-5p	Hua et al., 2019
	Ingerslev et al., 2018
hsa-miR-373-3p	Pantano et al., 2015
	Schuster et al., 2016
	Xu H et al., 2020
	Hua et al., 2019
	Ingerslev et al., 2018
hsa-miR-373-5p	Xu H et al., 2020
hsa-miR-374a	Nätt et al., 2019
hsa-miR-374a-3p	Pantano et al., 2015
	Xu H et al., 2020
	Hua et al., 2019
hsa-miR-374a-5p	Pantano et al., 2015
	Xu H et al., 2020
	Hua et al., 2019
	Ingerslev et al., 2018
hsa-miR-374b	Nätt et al., 2019
hsa-miR-374b-3p	Xu H et al., 2020
	Hua et al., 2019
hsa-miR-374b-5p	Schuster et al., 2016
	Xu H et al., 2020
	Hua et al., 2019
	Ingerslev et al., 2018
hsa-miR-375	Krawetz et al., 2011
	Nätt et al., 2019
	Pantano et al., 2015
	Schuster et al., 2016
	Xu H et al., 2020
	Ingerslev et al., 2018
hsa-miR-375-3p	Hua et al., 2019
hsa-miR-376a-2-5p	Pantano et al., 2015
hsa-miR-376a-3p	Schuster et al., 2016
	Xu H et al., 2020
	Hua et al., 2019
hsa-miR-376a-5p	Ingerslev et al., 2018
hsa-miR-376c-3p	Schuster et al., 2016
	Xu H et al., 2020
	Hua et al., 2019
hsa-miR-377-3p	Xu H et al., 2020
	Hua et al., 2019
	Ingerslev et al., 2018
hsa-miR-377-5p	Xu H et al., 2020
hsa-miR-378a	Nätt et al., 2019
hsa-miR-378a-3p	Pantano et al., 2015
	Schuster et al., 2016
	Xu H et al., 2020
	Hua et al., 2019
	Ingerslev et al., 2018
hsa-miR-378a-5p	Xu H et al., 2020
	Hua et al., 2019
hsa-miR-378c	Nätt et al., 2019
	Schuster et al., 2016
	Hua et al., 2019
	Ingerslev et al., 2018
hsa-miR-378d	Xu H et al., 2020
hsa-miR-378d-1	Nätt et al., 2019
hsa-miR-378d-2	Nätt et al., 2019
hsa-miR-378e	Nätt et al., 2019
	Xu H et al., 2020
hsa-miR-378i	Xu H et al., 2020
hsa-miR-379	Nätt et al., 2019
hsa-miR-379-3p	Xu H et al., 2020
hsa-miR-379-5p	Pantano et al., 2015
	Xu H et al., 2020
	Hua et al., 2019
	Ingerslev et al., 2018
hsa-miR-381	Nätt et al., 2019
hsa-miR-381-3p	Pantano et al., 2015
	Xu H et al., 2020
	Hua et al., 2019
	Ingerslev et al., 2018
hsa-miR-382	Nätt et al., 2019
hsa-miR-382-3p	Xu H et al., 2020
	Hua et al., 2019
	Ingerslev et al., 2018
hsa-miR-382-5p	Pantano et al., 2015
	Xu H et al., 2020
	Hua et al., 2019
	Ingerslev et al., 2018
hsa-miR-383	Pantano et al., 2015
	Xu H et al., 2020
hsa-miR-383-5p	Hua et al., 2019
	Ingerslev et al., 2018
hsa-miR-3908	Ingerslev et al., 2018
hsa-miR-3909	Xu H et al., 2020
	Hua et al., 2019
hsa-miR-3910	Xu H et al., 2020
hsa-miR-3911	Pantano et al., 2015
	Xu H et al., 2020
hsa-miR-3912	Xu H et al., 2020
hsa-miR-3912-3p	Ingerslev et al., 2018
hsa-miR-3915	Ingerslev et al., 2018
hsa-miR-3916	Ingerslev et al., 2018
hsa-miR-3917	Pantano et al., 2015
	Ingerslev et al., 2018
hsa-miR-3919	Xu H et al., 2020
hsa-miR-3920	Ingerslev et al., 2018
hsa-miR-3925	Nätt et al., 2019
hsa-miR-3925-3p	Xu H et al., 2020
	Hua et al., 2019
hsa-miR-3925-5p	Pantano et al., 2015
	Xu H et al., 2020
	Hua et al., 2019
	Ingerslev et al., 2018
hsa-miR-3928	Xu H et al., 2020
hsa-miR-3928-3p	Ingerslev et al., 2018
hsa-miR-3934-5p	Pantano et al., 2015
hsa-miR-3936	Xu H et al., 2020
hsa-miR-3940	Nätt et al., 2019
hsa-miR-3940-3p	Schuster et al., 2016
	Xu H et al., 2020
	Hua et al., 2019
	Ingerslev et al., 2018
hsa-miR-3940-5p	Pantano et al., 2015
	Schuster et al., 2016
	Ingerslev et al., 2018
hsa-miR-3942-3p	Xu H et al., 2020
hsa-miR-3943	Pantano et al., 2015
	Xu H et al., 2020
hsa-miR-3944-3p	Ingerslev et al., 2018
hsa-miR-3944-5p	Xu H et al., 2020
hsa-miR-3960	Nätt et al., 2019
	Pantano et al., 2015
	Schuster et al., 2016
	Ingerslev et al., 2018
hsa-miR-409	Nätt et al., 2019
hsa-miR-409-3p	Xu H et al., 2020
	Hua et al., 2019
	Ingerslev et al., 2018
hsa-miR-409-5p	Xu H et al., 2020
	Hua et al., 2019
	Ingerslev et al., 2018
hsa-miR-410	Xu H et al., 2020
hsa-miR-410-3p	Hua et al., 2019
hsa-miR-411-3p	Xu H et al., 2020
	Ingerslev et al., 2018
hsa-miR-411-5p	Pantano et al., 2015
	Xu H et al., 2020
	Hua et al., 2019
	Ingerslev et al., 2018
hsa-miR-421	Xu H et al., 2020
	Hua et al., 2019
	Ingerslev et al., 2018
hsa-miR-423	Krawetz et al., 2011
	Nätt et al., 2019
hsa-miR-423-3p	Pantano et al., 2015
	Xu H et al., 2020
	Hua et al., 2019
	Ingerslev et al., 2018
hsa-miR-423-5p	Pantano et al., 2015
	Schuster et al., 2016
	Xu H et al., 2020
	Hua et al., 2019
	Ingerslev et al., 2018
hsa-miR-424-3p	Xu H et al., 2020
	Hua et al., 2019
	Ingerslev et al., 2018
hsa-miR-424-5p	Pantano et al., 2015
	Schuster et al., 2016
	Xu H et al., 2020
	Hua et al., 2019
hsa-miR-425	Nätt et al., 2019
hsa-miR-425-3p	Pantano et al., 2015
	Xu H et al., 2020
	Hua et al., 2019
	Ingerslev et al., 2018
hsa-miR-425-5p	Pantano et al., 2015
	Schuster et al., 2016
	Xu H et al., 2020
	Hua et al., 2019
	Ingerslev et al., 2018
hsa-miR-4284	Ingerslev et al., 2018
hsa-miR-4286	Schuster et al., 2016
	Xu H et al., 2020
	Hua et al., 2019
	Ingerslev et al., 2018
hsa-miR-429	Nätt et al., 2019
	Pantano et al., 2015
	Xu H et al., 2020
	Hua et al., 2019
	Ingerslev et al., 2018
hsa-miR-4290	Schuster et al., 2016
hsa-miR-4291	Ingerslev et al., 2018
hsa-miR-4301	Schuster et al., 2016
hsa-miR-4311	Ingerslev et al., 2018
hsa-miR-431-5p	Xu H et al., 2020
hsa-miR-4321	Ingerslev et al., 2018
hsa-miR-432-5p	Pantano et al., 2015
	Xu H et al., 2020
hsa-miR-4326	Xu H et al., 2020
	Ingerslev et al., 2018
hsa-miR-4328	Ingerslev et al., 2018
hsa-miR-433	Xu H et al., 2020
hsa-miR-4419a	Nätt et al., 2019
hsa-miR-4422	Xu H et al., 2020
hsa-miR-4423-3p	Schuster et al., 2016
	Xu H et al., 2020
	Hua et al., 2019
	Ingerslev et al., 2018
hsa-miR-4423-5p	Xu H et al., 2020
hsa-miR-4425	Xu H et al., 2020
hsa-miR-4427	Ingerslev et al., 2018
hsa-miR-4428	Xu H et al., 2020
hsa-miR-4432	Ingerslev et al., 2018
hsa-miR-4433a-5p	Schuster et al., 2016
hsa-miR-4433b-3p	Schuster et al., 2016
hsa-miR-4443	Nätt et al., 2019
	Ingerslev et al., 2018
hsa-miR-4444	Ingerslev et al., 2018
hsa-miR-4445-5p	Xu H et al., 2020
hsa-miR-4446-3p	Xu H et al., 2020
hsa-miR-4448	Xu H et al., 2020
	Ingerslev et al., 2018
hsa-miR-4454	Schuster et al., 2016
	Xu H et al., 2020
	Hua et al., 2019
	Ingerslev et al., 2018
hsa-miR-4461	Xu H et al., 2020
	Ingerslev et al., 2018
hsa-miR-4473	Ingerslev et al., 2018
hsa-miR-4478	Ingerslev et al., 2018
hsa-miR-4482-5p	Xu H et al., 2020
hsa-miR-4484	Ingerslev et al., 2018
hsa-miR-4485	Xu H et al., 2020
hsa-miR-4485-3p	Schuster et al., 2016
	Hua et al., 2019
	Ingerslev et al., 2018
hsa-miR-4485-5p	Ingerslev et al., 2018
hsa-miR-4488	Nätt et al., 2019
	Pantano et al., 2015
	Schuster et al., 2016
	Xu H et al., 2020
	Hua et al., 2019
	Ingerslev et al., 2018
hsa-miR-4489	Ingerslev et al., 2018
hsa-miR-4492	Nätt et al., 2019
	Pantano et al., 2015
	Xu H et al., 2020
	Hua et al., 2019
	Ingerslev et al., 2018
hsa-miR-4496	Ingerslev et al., 2018
hsa-miR-4497	Nätt et al., 2019
	Ingerslev et al., 2018
hsa-miR-449a	Nätt et al., 2019
	Pantano et al., 2015
	Schuster et al., 2016
	Xu H et al., 2020
	Hua et al., 2019
	Ingerslev et al., 2018
hsa-miR-449b-3p	Schuster et al., 2016
	Xu H et al., 2020
	Hua et al., 2019
	Ingerslev et al., 2018
hsa-miR-449b-5p	Xu H et al., 2020
	Hua et al., 2019
hsa-miR-449c	Nätt et al., 2019
hsa-miR-449c-5p	Pantano et al., 2015
	Xu H et al., 2020
	Hua et al., 2019
hsa-miR-4504	Ingerslev et al., 2018
hsa-miR-4505	Ingerslev et al., 2018
hsa-miR-4508	Nätt et al., 2019
	Pantano et al., 2015
	Schuster et al., 2016
	Xu H et al., 2020
	Ingerslev et al., 2018
hsa-miR-450a-1	Nätt et al., 2019
hsa-miR-450a-2	Nätt et al., 2019
hsa-miR-450a-5p	Xu H et al., 2020
	Hua et al., 2019
	Ingerslev et al., 2018
hsa-miR-450b	Nätt et al., 2019
hsa-miR-450b-5p	Xu H et al., 2020
	Hua et al., 2019
	Ingerslev et al., 2018
hsa-miR-4512	Xu H et al., 2020
hsa-miR-4516	Nätt et al., 2019
	Pantano et al., 2015
	Xu H et al., 2020
	Hua et al., 2019
	Ingerslev et al., 2018
hsa-miR-4518	Ingerslev et al., 2018
hsa-miR-451a	Nätt et al., 2019
	Schuster et al., 2016
	Xu H et al., 2020
	Hua et al., 2019
	Ingerslev et al., 2018
hsa-miR-4521	Xu H et al., 2020
hsa-miR-4524a-3p	Xu H et al., 2020
hsa-miR-4524b-5p	Ingerslev et al., 2018
hsa-miR-452-5p	Pantano et al., 2015
	Xu H et al., 2020
	Hua et al., 2019
	Ingerslev et al., 2018
hsa-miR-4530	Schuster et al., 2016
hsa-miR-4532	Pantano et al., 2015
	Ingerslev et al., 2018
hsa-miR-454-3p	Schuster et al., 2016
	Xu H et al., 2020
	Hua et al., 2019
	Ingerslev et al., 2018
hsa-miR-454-5p	Xu H et al., 2020
hsa-miR-455	Nätt et al., 2019
hsa-miR-455-3p	Schuster et al., 2016
	Xu H et al., 2020
	Hua et al., 2019
	Ingerslev et al., 2018
hsa-miR-455-5p	Pantano et al., 2015
	Xu H et al., 2020
	Hua et al., 2019
	Ingerslev et al., 2018
hsa-miR-4632-3p	Schuster et al., 2016
	Xu H et al., 2020
hsa-miR-4632-5p	Schuster et al., 2016
hsa-miR-4636	Xu H et al., 2020
hsa-miR-4641	Xu H et al., 2020
hsa-miR-4645-3p	Xu H et al., 2020
hsa-miR-4649-5p	Schuster et al., 2016
hsa-miR-4651	Ingerslev et al., 2018
hsa-miR-4657	Ingerslev et al., 2018
hsa-miR-4659a-3p	Xu H et al., 2020
hsa-miR-4659b-5p	Ingerslev et al., 2018
hsa-miR-4661	Nätt et al., 2019
hsa-miR-4661-5p	Xu H et al., 2020
	Ingerslev et al., 2018
hsa-miR-4662a-3p	Xu H et al., 2020
hsa-miR-4662a-5p	Xu H et al., 2020
	Hua et al., 2019
hsa-miR-4662b	Xu H et al., 2020
hsa-miR-4664-3p	Ingerslev et al., 2018
hsa-miR-4667-3p	Ingerslev et al., 2018
hsa-miR-4670-3p	Ingerslev et al., 2018
hsa-miR-4670-5p	Xu H et al., 2020
hsa-miR-4676-3p	Xu H et al., 2020
hsa-miR-4677-3p	Xu H et al., 2020
	Hua et al., 2019
	Ingerslev et al., 2018
hsa-miR-4677-5p	Pantano et al., 2015
hsa-miR-4680-5p	Ingerslev et al., 2018
hsa-miR-4683	Ingerslev et al., 2018
hsa-miR-4687-5p	Xu H et al., 2020
hsa-miR-4690-3p	Xu H et al., 2020
hsa-miR-4699-5p	Xu H et al., 2020
hsa-miR-4700-5p	Pantano et al., 2015
	Ingerslev et al., 2018
hsa-miR-4705	Schuster et al., 2016
	Xu H et al., 2020
	Hua et al., 2019
	Ingerslev et al., 2018
hsa-miR-4707-3p	Xu H et al., 2020
hsa-miR-4709-3p	Ingerslev et al., 2018
hsa-miR-4709-5p	Xu H et al., 2020
	Ingerslev et al., 2018
hsa-miR-4719	Xu H et al., 2020
hsa-miR-4725-3p	Xu H et al., 2020
hsa-miR-4741	Ingerslev et al., 2018
hsa-miR-4742-3p	Ingerslev et al., 2018
hsa-miR-4742-5p	Xu H et al., 2020
hsa-miR-4743-5p	Xu H et al., 2020
hsa-miR-4746-5p	Xu H et al., 2020
hsa-miR-4747-3p	Ingerslev et al., 2018
hsa-miR-4749-3p	Ingerslev et al., 2018
hsa-miR-4751	Pantano et al., 2015
hsa-miR-4755-3p	Xu H et al., 2020
hsa-miR-4755-5p	Xu H et al., 2020
hsa-miR-4757-5p	Pantano et al., 2015
hsa-miR-4760-5p	Xu H et al., 2020
	Ingerslev et al., 2018
hsa-miR-4762-3p	Xu H et al., 2020
hsa-miR-4762-5p	Xu H et al., 2020
hsa-miR-4763-3p	Ingerslev et al., 2018
hsa-miR-4766-3p	Xu H et al., 2020
hsa-miR-4766-5p	Ingerslev et al., 2018
hsa-miR-4768-3p	Ingerslev et al., 2018
hsa-miR-4772-3p	Xu H et al., 2020
hsa-miR-4772-5p	Xu H et al., 2020
hsa-miR-4773	Xu H et al., 2020
	Hua et al., 2019
	Ingerslev et al., 2018
hsa-miR-4775	Xu H et al., 2020
hsa-miR-4781-3p	Xu H et al., 2020
	Ingerslev et al., 2018
hsa-miR-4781-5p	Xu H et al., 2020
hsa-miR-4783-5p	Ingerslev et al., 2018
hsa-miR-4784	Ingerslev et al., 2018
hsa-miR-4787-5p	Schuster et al., 2016
	Ingerslev et al., 2018
hsa-miR-4791	Xu H et al., 2020
hsa-miR-4792	Pantano et al., 2015
	Schuster et al., 2016
	Ingerslev et al., 2018
hsa-miR-4795-3p	Xu H et al., 2020
hsa-miR-4796-3p	Xu H et al., 2020
hsa-miR-4796-5p	Xu H et al., 2020
hsa-miR-4797-3p	Xu H et al., 2020
hsa-miR-4797-5p	Ingerslev et al., 2018
hsa-miR-4802-3p	Xu H et al., 2020
hsa-miR-4802-5p	Xu H et al., 2020
hsa-miR-483-3p	Schuster et al., 2016
hsa-miR-483-5p	Xu H et al., 2020
hsa-miR-484	Nätt et al., 2019
	Schuster et al., 2016
	Xu H et al., 2020
	Hua et al., 2019
	Ingerslev et al., 2018
hsa-miR-485-3p	Xu H et al., 2020
hsa-miR-485-5p	Xu H et al., 2020
hsa-miR-486-1	Nätt et al., 2019
hsa-miR-486-2	Nätt et al., 2019
hsa-miR-486-3p	Xu H et al., 2020
	Ingerslev et al., 2018
hsa-miR-486-5p	Pantano et al., 2015
	Schuster et al., 2016
	Xu H et al., 2020
	Hua et al., 2019
	Ingerslev et al., 2018
hsa-miR-487a	Pantano et al., 2015
	Xu H et al., 2020
hsa-miR-487a-3p	Hua et al., 2019
hsa-miR-487b	Xu H et al., 2020
hsa-miR-487b-3p	Hua et al., 2019
	Ingerslev et al., 2018
hsa-miR-488-3p	Xu H et al., 2020
	Hua et al., 2019
	Ingerslev et al., 2018
hsa-miR-488-5p	Xu H et al., 2020
hsa-miR-489	Xu H et al., 2020
hsa-miR-489-5p	Ingerslev et al., 2018
hsa-miR-491-3p	Xu H et al., 2020
hsa-miR-491-5p	Xu H et al., 2020
	Hua et al., 2019
	Ingerslev et al., 2018
hsa-miR-493	Nätt et al., 2019
hsa-miR-493-3p	Xu H et al., 2020
	Hua et al., 2019
hsa-miR-493-5p	Xu H et al., 2020
	Hua et al., 2019
	Ingerslev et al., 2018
hsa-miR-494	Xu H et al., 2020
hsa-miR-494-3p	Schuster et al., 2016
	Hua et al., 2019
	Ingerslev et al., 2018
hsa-miR-495	Nätt et al., 2019
hsa-miR-495-3p	Xu H et al., 2020
	Hua et al., 2019
	Ingerslev et al., 2018
hsa-miR-497-5p	Schuster et al., 2016
	Xu H et al., 2020
	Hua et al., 2019
	Ingerslev et al., 2018
hsa-miR-498	Pantano et al., 2015
	Xu H et al., 2020
hsa-miR-498-3p	Hua et al., 2019
hsa-miR-499a	Nätt et al., 2019
hsa-miR-499a-3p	Pantano et al., 2015
	Xu H et al., 2020
hsa-miR-499a-5p	Pantano et al., 2015
	Schuster et al., 2016
	Xu H et al., 2020
	Hua et al., 2019
	Ingerslev et al., 2018
hsa-miR-499b-3p	Ingerslev et al., 2018
hsa-miR-499b-5p	Hua et al., 2019
hsa-miR-5000-3p	Xu H et al., 2020
	Ingerslev et al., 2018
hsa-miR-5002-5p	Pantano et al., 2015
hsa-miR-5003-5p	Xu H et al., 2020
hsa-miR-500a	Nätt et al., 2019
hsa-miR-500a-3p	Xu H et al., 2020
	Hua et al., 2019
	Ingerslev et al., 2018
hsa-miR-500a-5p	Xu H et al., 2020
	Hua et al., 2019
	Ingerslev et al., 2018
hsa-miR-501	Nätt et al., 2019
hsa-miR-5010-3p	Ingerslev et al., 2018
hsa-miR-5010-5p	Ingerslev et al., 2018
hsa-miR-501-3p	Xu H et al., 2020
	Hua et al., 2019
	Ingerslev et al., 2018
hsa-miR-501-5p	Xu H et al., 2020
	Ingerslev et al., 2018
hsa-miR-502	Nätt et al., 2019
hsa-miR-502-3p	Xu H et al., 2020
	Hua et al., 2019
	Ingerslev et al., 2018
hsa-miR-503-5p	Schuster et al., 2016
	Xu H et al., 2020
	Ingerslev et al., 2018
hsa-miR-504	Nätt et al., 2019
	Xu H et al., 2020
hsa-miR-504-5p	Hua et al., 2019
	Ingerslev et al., 2018
hsa-miR-505-3p	Xu H et al., 2020
	Hua et al., 2019
	Ingerslev et al., 2018
hsa-miR-505-5p	Xu H et al., 2020
[truncated: 652 more rows]

## Sheet: Supplementary Table S7
Supplementary Table S7 - List of target genes of the 15 DEMs identified between age groups.
DEM	hsa-miR-6860	hsa-miR-148b-5p	hsa-miR-451a	hsa-miR-499c-3p	hsa-miR-4301	hsa-miR-548f-3p	hsa-miR-363-5p	hsa-miR-339-5p	hsa-miR-874-5p	hsa-miR-371b-3p	hsa-miR-1290	hsa-miR-4423-5p	hsa-miR-6749-5p	hsa-miR-425-3p	hsa-miR-449c-39
Groups	G4 vs G3; G3 vs G2; G3 vs G1	G4 vs G3; G2 vs G2; G3 vs G1	G4 vs G2; G4 vs G1	G4 vs G2	G4 vs G1	G4 vs G1	G4 vs G1	G4 vs G1	G3 vs G2; G3 vs G1	G3 vs G2	G3 vs G1	G3 vs G1	G3 vs G1	G3 vs G1	G3 vs G2; G1 vs G2
TargetScan (nr)	6087	4109	29	0	3502	6699	4869	206	4046	2514	4601	3430	1076	928	2088
miRDB (nr)	764	499	40	0	245	1648	529	392	486	190	945	214	38	35	235
Identified in both databases (nr)	683	449	12	0	220	1532	478	81	443	179	853	191	30	31	212
Target gene (Gene name)	GIPC3	TCP11L2	OSR1		IL23A	FTHL17	GSG1L	ZDHHC22	FAM53A	CYB561D1	HIGD2A	CD226	NPAS1	PER2	ACOT13
	PPP1R16B	ASF1A	ATF2		MDM4	TFRC	ENTPD2	LHX6	ISY1-RAB43	ULK3	WDR77	NME1-NME2	C19orf47	OTX1	NXPE4
	NFAM1	TDGF1	MIF		TSPAN31	BEX2	HIVEP3	C6orf223	ZFYVE28	HDDC2	OGN	SMARCB1	ACP5	UBALD2	BAG2
	CCL28	IDNK	PSMB8		CXCL3	ZMAT3	LHPP	BACE1	ALX4	FEZ2	MAGOH	KCTD18	NADK	KIFC2	UBR5
	MGAT5B	TMED4	S1PR2		NDP	TMEM236	PLBD2	ZNF689	KCNJ9	ZNF213	RPL34	SH3BGRL3	TMEM54	CXCL9	KLHL7
	NUDT19	CLEC5A	VAPA		PRELID2	FOXJ3	SOD3	RNASE7	GPX3	IFNA8	NMU	ANAPC16	DAPK3	EPB41L5	RPA4
	PRND	ACKR4	CDKN2D		C9orf135	PAGE5	FAM169B	TLE3	POLR3H	C19orf48	OR9Q1	NME2	CBX4	C11orf49	YWHAQ
	TEAD3	THRSP	SAMD4B		CWH43	PHIP	FOXJ2	NIF3L1	NAT8L	HAND2	MSR1	KCTD4	HPCA	LMOD3	LUM
	TOMM5	COX11	PMM2		FAM114A2	XRN2	CHAD	NNAT	TOR2A	HESX1	PSMA2	FGF9	GDNF	RTN3	HNRNPA0
	PLEKHG4B	KCNIP1	FBXO33		WDR31	C1orf131	ARMCX6	ALKBH1	MC1R	DCTN5	CXorf66	COPS2	RGS11	MED1	G3BP2
	TMEM41B	MNAT1	CAB39		WDR82	SKIL	IQSEC2	TMEM183A	VASH1	F2R	NDUFV3	CYP27C1	ATN1	WFDC3	CXCR6
	LYPD8	CHCHD1	TTN		TMEM97	ARSK	TSPAN11	CNNM4	C6orf223	FAM167A	TNFRSF8	KLHL20	BROX	C10orf67	DEFB132
	KIAA1755	ETS1			ACBD7	ELL2	PLA2G2A	SERTAD4	TMEM235	BEND4	GYS2	COQ10B	MTRNR2L1	DUSP1	NXT2
	RNF207	SSBP2			HTRA4	C2orf88	DNAJC8	GTF2I	SUN2	FAM189B	THRSP	PKD2L2	XYLT2	GOLGA7B	CD1E
	ZNF322	BPIFA1			ZFAND2A	STARD3NL	ZDHHC22	EMILIN2	PKP1	TMEM25	EMP2	CRCP	ACAP3	KIAA1522	CXCL12
	SPRN	PRIM1			RNF11	SASS6	KCNAB2	NOVA1	ZDHHC8	PAFAH1B1	MT1G	LSMEM1	SIAE	KCTD5	CYP39A1
	ZC3HAV1L	CYYR1			SIX1	SPINK7	ZMYND10	BRMS1L	RUSC2	CHRNA3	FRA10AC1	G6PC3	DPEP1	MGAT5B	SLC10A7
	ARMC5	UBL3			RCAN1	DSC2	PRELP	NRXN1	GPR173	ZNF286B	CT47A11	IL5RA	SOST	MECP2	CLEC4D
	CCL22	LIMS1			AGPAT4	CPNE8	ARHGAP17	CYTH1	GPR132	GALK2	CT47A3	LRRFIP1	CARD14	SEC31B	PCGF6
	GUCD1	CHMP1B			CENPH	PTPN12	SVOP	FAM167A	HMGA1	NFATC2	CT47A6	ANGPT2	MLLT1	FIBIN	EDA2R
	B4GALNT1	C5orf64			CNIH1	SLC39A12	IRF2BP1	ZNF385B	ELAVL3	TSPAN17	CT47A8	WBP2NL	MEOX1	ENTPD1	C1QTNF9
	CDKAL1	ATP6V1C2			ANP32E	PARPBP	WDR38	CNOT6	SLC38A7	OR2H1	CT47A4	RND2	ADRA1D	FBXO45	SLC22A9
	IL17REL	C12orf66			ZNF146	PKNOX1	HSPG2	LSM14B	ZSWIM8	CACNA1E	CT47A10	TSPAN18	IDH3A	IFNAR2	NEUROD4
	CENPH	FMO3			RALB	QKI	KCNK17	BEND3	KLHDC7A	FAM53B	CT47A1	PHF2	B3GALT5	TTPAL	KRAS
	CLDN11	RGS2			MOCS2	SCHIP1	TIMP1	TMEM178B	MAP2K7	ZADH2	CT47A2	TAPT1	LDB2	LMTK2	ROR1
	S100A3	KLF10			DCAF12	EVI2B	PRRT1	PLEKHH1	VPS37D	AARD	CT47A9	VTCN1	BRWD3	RIF1	NUDCD1
	NAT8L	FCGR3B			PARVG	FARS2	HIST2H2BE	CDK14	BARX1	UBR5	CT47A7	MTPN	C11orf45	TLE3	RARRES1
	LHPP	NHLH2			TPK1	IL10	ISCA1	CERS4	PNMA5	KCNJ2	CT47A5	TNIP3	SNX29	KDELR2	TMEM182
	IFI35	FCRLA			HAUS4	RNF7	NPY	PHC1	CSDC2	GPR137B	CT47A12	NUFIP2	ZBTB20	TXNDC17	TSPAN3
	C14orf180	TTLL6			LEF1	LEKR1	TTYH3	AKAP10	NDST1	APOL6	CT47B1	CD86	GRIN2A	TCP10L	ACTBL2
	RPL31	C6orf47			CRCP	BTF3	VDR	RBM27	KCNIP3	UQCC1	ADH1A	PRPF38A		LRP8	ZNF441
	AKAP13	FABP2			ATP6V1H	CDC14A	POLR1A	SLX4IP	IL17REL	SFR1	SPARCL1	HSD3B2			WDFY1
	SLC22A14	C15orf56			KLHL12	TMEM33	LIF	MMP15	KSR2	GLYATL1	EHHADH	SPIN1			NANOS1
	GAB2	RB1CC1			MAGEA6	GALNT9	RASGEF1C	SNX27	PEF1	CCDC137	CYSTM1	MORC3			PPP1R3D
	DCTN5	C6orf62			SLC16A12	SSR1	NFIC	TMEM119	PAX5	INHBE	MT1H	ANO10			DSG1
	CENPV	FCGR3A			TMEM182	ECHS1	C2orf68	BCL6	SUMF2	SUDS3	FAM71C	TBC1D23			TCTN3
	CDCP1	RNF13			CACUL1	TPBG	TMEM92	PLEKHH3	CAPSL	MMP3	FOXC1	ZNF24			TPM4
	CYCS	UBE3A			BET1	OSM	SMCP	SLC4A10	NTN1	IL10RA	SH2D1A	MAT1A			CCSAP
	TSG101	LRRC58			ACP2	FGG	CD74	ARHGAP36	WDR82	PTAFR	PEAK1	ARIH2			FUK
	NPLOC4	SIRT5			ZNF554	ANP32E	TIMMDC1	STOX2	NXPH3	REEP1	CST9L	ZNF713			DHRS2
	NINJ1	CDCP2			NUDT15	FAM3C	ZNF584	P2RY2	EPHA10	TEDDM1	CIZ1	ZNF701			KBTBD2
	METTL7A	CFHR1			MAGEA3	SRP14	SYN1	USF2	RCOR2	RHOXF2	C9orf170	DDIT4L			NKX3-1
	KLRD1	VTCN1			CAPRIN2	ARL15	TRIM29	KLF11	DEDD2	ZNF286A	FXR2	HNRNPUL1			HTR2C
	DPYSL2	ELP4			AP2M1	PLGRKT	MDGA1	NF2	CHCHD4	CLIC5	APOC1	EPC2			ULBP3
	MLC1	GALNT1			MSMO1	CENPH	FOXO6	PDZD4	CLPSL2	ZNF2	DTL	FOPNL			YOD1
	CMKLR1	CD69			BACE1	IPMK	RSPO4	ZNF275	SRF	CARD10	BEND7	NRP1			TRIM2
	MDM4	ALG14			TMEM178B	RPS27L	ISY1-RAB43	ACTR1A	ANKRD52	FBXL3	ZNF615	CDNF			SMCO3
	SYNDIG1L	ANKRD34B			ZCCHC12	NNT	CCDC150	MYO1C	BFSP1	SMARCD1	MRI1	ANKRD13A			GPBP1
	WFDC8	IL6			CACFD1	ZNF561	PKNOX2	ARRDC3	RIMS4	ATG10	MAGEB1	ZBTB44			PRR18
	FMOD	IAH1			GNPNAT1	CHRAC1	TRA2A	FHL1	GAS6	PTPRG	KLHL12	GPR85			TMTC4
	MCF2	LYN			UBE2W	NGF	TNNI1	CASD1	C11orf49	PCNT	TCN1	GAD1			THUMPD1
	SRFBP1	SPATA9			PCDH15	EIF1	CALN1	EPHA4	EFNA1	TMEM236	SLAMF6	ORAI2			PDE12
	TRIM16L	WT1			CLMP	RPS16	KRTAP5-6	VPS4A	SNPH	ZNF749	UBE2G1	GIMAP1			VAT1L
	NKAIN1	BNIP2			PEX11A	VMA21	MPV17L	UBE3A	CENPV	TOMM6	AKAP7	GCSAML			LMNB1
	TRIM16	GEMIN5			GPSM2	PITX2	GTPBP1	KMT2A	PRSS45	GABBR2	LCE1E	EIF4H			UTP14C
	MAPK13	TCEAL1			SEPT11	SCML1	TOR1A	BTBD9	CPSF7	GPR183	TMEM39B	ABCE1			POGLUT1
	KLK10	B4GALT6			VASH2	PAIP1	OLFM2	FBXO28	NUAK2	S100A4	VPS45	STK24			VEPH1
	FAM3D	FCRL1			ELAVL4	ATL1	RNF11	DAAM2	FBRS	RHOXF2B	TMEM159	CCDC177			FAM8A1
	CHMP1B	PIN4			NDRG2	DTWD2	RCAN3	UNC5C	MTSS1L	SEMA3D	SCP2	CACUL1			FAR1
	CDH1	NBR1			ZNF528	PRPF38A	LTB4R2	TRPC3	TMEM121	PGM2L1	GJC3	DCUN1D4			RWDD2A
	NXF1	MORN4			CREBZF	CHST14	C6orf223	ZBTB43	NCBP2	CCDC13	OTUD4	HLA-DQA1			GOLGA1
	SPSB4	IL7R			UBXN4	SLC22A16	COL9A2	CLPB	ANGPTL4	CDCA8	CALM2	TMED7			TTL
	BBS1	CYP3A4			LONP2	UBE2D1	METTL7A	PODXL	SEMA3F	CISH	ST8SIA4	KATNAL2			MOB3A
	AMHR2	HMGCS1			FAM111B	RAD51AP1	ASB6	ZBED4	PDPK1	GBP2	CNTN6	BNIP2			ZNF829
	TNFRSF8	TRIP4			TFR2	NOVA1	PAX5	SHISA7	IQCE	HEPHL1	WBP2	IL6ST			ZDHHC17
	FABP2	ABHD17B			SLC39A6	SOX15	CIAPIN1	TNRC6C	STK40	FURIN	STK17A	NUDT16			ADAMTS8
	LRRC41	PRRX1			RNF141	ATRNL1	TNS4	AKIRIN1	NXF1	STAT3	ERCC8	VIP			FZD4
	CEP44	SNRPD3			GIMAP2	IQCJ-SCHIP1	ITFG2	BCL2L11	C10orf62	TIPARP	OSTC	PRR11			ANKRD34C
	FAM163A	HGD			SLC31A1	VTA1	ARF3	CHD1	IFITM5	GABRE	ARHGAP17	IMPA1			ECT2
	BTRC	BCL7A			IGF2BP1	ERMAP	TSPAN18	UBN2	ORMDL3	FBXO21	RAB18	ALDH2			AP3B1
	SYNGR1	PPM1D			ELF2	WTAP	ZNF512B	ZNRF2	BCL2L2	HOXC13	EPCAM	FAM47B			ANXA5
	CEACAM7	SLC25A16			ERMN	CDCA4	TAF8	SLC44A1	CHRNA4	TRIM35	CBLL1	GPHN			GOLM1
	CD84	ZMAT3			C2orf49	C4orf51	SLC25A23	NFASC	PGPEP1	CLOCK	PTPRA	LATS2			ZNF567
	RD3	ZC3H14			TRIM7	MED4	AIPL1	TMEM120B	FZD7	ANKRD52	ARL4C	SLC25A21			HECW2
	RMI1	CFH			DIO2	GLYATL2	H2AFB2	SLC24A3	PTBP1	MAPK1	TRDMT1	ZNF154			TCP11L2
	DDX11	NKD1			INO80D	ESX1	H2AFB1	ERBB4	ICAM1	ERVMER34-1	KLK7	CEP97			KIDINS220
	XIRP1	PLEKHS1			ZFP36L1	ATF2	ZMIZ1	PCDH17	WIZ	ARID4A	ATF1	IL1RAP			MYCBP
	TAS1R3	SERP1			TNPO1	SOHLH2	H2AFB3	MAPRE1	TVP23A	GALNT10	SLC10A3	COMMD2			HEPACAM
	KCNC1	HTRA4			PIK3CB	RBBP8	PER2	BLCAP	FBLIM1	FGD1	ZRANB2	KIAA0754			PARP9
	CERCAM	GPC4			NDST1	OLAH	ST8SIA5	PRDM6	SNRPA	RECK	LPP	FBXL17			SUSD3
	NLRP14	MAN2B2			SMAP2	GTF2IRD2B	RBM19	KIF1B	RAB22A	PTP4A2	C20orf173	FUT11			CCNO
	HLA-DQB1	SUCNR1			NFKBIZ	GEMIN2	FGF12		TNNI1	BNIP2	CNOT7	SFMBT2			ZNF212
	LARP1	DEFB110			CDK15	ACKR3	LHX6		GRAMD4	FMNL3	CATSPERB	G3BP2			IPO7
	TANGO2	NLRP3			SGIP1	ZNF680	CASR		MAGEB6	BRPF1	PRPS1	NYX			NLGN1
	PPP1R1A	FAM71E2			TMPRSS11A	DSG2	UAP1L1		CPLX3	CLDN2	KANK4	ADAM12			NRIP1
	YTHDF1	NEDD1			FAM177A1	KDELR3	NXN		EIF4E1B	KCNJ13	PRRG1	FAM84B			OXTR
	ATXN7L3B	SATB2			EGLN1	NTN4	CDSN		TMEM140	WFDC3	DCUN1D5	PITPNA			SECISBP2L
	TSPAN18	FAM122C			GPR63	CALM1	RIMS4		CBX6	CCDC14	BECN1	DDX21			ACER3
	PDE6A	CCNJ			CYP4V2	RDH16	HAND1		IFITM10	TMCC2	COG5	IPCEF1			ANKIB1
	SLC9A3R2	SH3BGRL2			NR2C2	AARD	ZSWIM1		AGFG2	ZRANB1	EFNA5	LRRC59			VAPA
	MED29	PPM1N			SH3D19	PTBP2	TERF2		FOLR2	ZNF787	ACKR4	FBN2			STK38L
	ZBTB3	STARD4			SPRTN	YWHAE	ZNF587		IFFO1	ATXN1	DPT	BEND4			KLHL3
	CLSPN	DPP10			NR1I3	GDPD1	OTP		NELFB	PAFAH1B2	RAP2C	KLF6			ZNF678
	ZNF549	GUCY1A2			ZNF549	CKS2	GBA2		GNA11	HIC1	LDHA	GPR26			CCDC170
	SLC26A9	PRY2			PTPRD	PIWIL4	ZNF490		NSMF	ATXN7L3	ONECUT2	SRSF11			BOLL
	EXD1	PRY			PPP1R3D	PPM1D	CCDC177		ORAI1	FAM53C	ZNF254	KDM6A			FBXO3
	SHISA7	RGS9BP			ARHGEF38	GTF2IRD2	HSD3B2		CEP85	ZNF529	ZNF569	ABCG8			SLC35G3
	GPR62	NAA11			ALDH3B2	LUC7L2	EBF1		IFFO2	ZSWIM5	MS4A3	EPS15			OTUD4
	DNAJB12	KATNBL1			SMAD1	ELMOD2	RPS6KA4		TBX6	LIN7C	FHL5	MIB1			SPRY3
	TAF11	SMCHD1			CNBP	DNAJB14	HEYL		ACOT12	KSR1	SEPHS1	PHF6			TMEM260
	MYO1D	ART3			VASH1	TRIM60	FOXP4		ETNK2	NCR3LG1	ZNF124	PTPN5			CHL1
	DMTN	CA5A			FUT9	GPR85	SC5D		MYOG	ZIC4	MARVELD3	STT3B			STX12
	SC5D	SLC16A1			BMF	C3orf33	SAP130		TEF	ZFHX4	CBFA2T3	KIAA0825			TMEM196
	PRELP	FAM20B			CST9	SEC61B	TMEM178B		RAB43	RNF121	EN2	NSUN7			STK39
	PLOD1	ANKRD28			C1orf189	CYP17A1	KCTD13		ARHGEF2	TTYH1	RNF207	FNDC3A			GSPT1
	TAL2	FOXO3			CIRBP	PI4K2B	XRCC3		CCKAR	SPRY1	GPATCH11	CNOT6			ITGA6
	SNX22	UGCG			GPRC5A	CLDN12	CBLN3		DBN1	ZBTB20	ZNF781	EDIL3			DRD1
	TCAP	KDM2B			SSUH2	MMGT1	TMEM161B		SLC39A7	ZNF570	MAF	PCDH10			KDM1A
	GABRA3	C10orf88			SMO	COX15	PIAS4		IQCC	SLC25A24	TMEM69	MYH15			EIF5A2
	MTFR1L	IQCB1			SRXN1	ASNSD1	CLDN22		MLEC	ETS1	ZNF267	PPP1R12B			CARNS1
	RRNAD1	AP5M1			FKBP14	RSBN1	VSX2		RNF26	RUNDC1	FSCN3	RNPS1			LRRTM2
	CYP8B1	VASH2			RNF145	DOCK9	PDGFB		MAP3K11	FGD5	GPR34	MAVS			CNOT7
	CBR1	ELOVL2			OCRL	CDCA7	ZDHHC21		VAPB	RBP3	PROCR	PLEKHG1			TTPA
	FGD3	ZNF518B			CPLX2	EBF2	MFAP3L		TMEM104	UVSSA	RTKN2	TMOD1			RPTN
	FAM124A	CLDN22			ZNF10	SNRPD1	POLR3H		LPCAT3	CDCA7L	CSTB	ANKRD10			CLCN4
	MED27	TMSB4X			DSTYK	H2AFY	CTSK		TMEM79	CACNA1D	ENY2	RSBN1			STX2
	CAMK2N2	STOM			ATXN1L	TRAPPC1	CEP19		GHRHR	TBL1X	C9	ABCC4			MID1IP1
	CD300LG	LZTFL1			ACTBL2	NRK	SPRN		NCLN	PFN2	BEX5	NR3C2			ZFP36L2
	ASAH2B	SNX31			C2orf72	TOP2B	TFE3		DYRK1B	DSC3	AADACL4	STC2			PRSS12
	HOXA13	SMAD9			C1orf127	PLEKHB2	CLEC4D		ZBTB4	GIPC2	POP7	FMR1			ADAMTS19
	RORC	NUCB2			SLC35B4	GPATCH2L	COL23A1		BAHD1	ZBTB3	CCNG2	ATP9A			CEP128
	KCNQ3	ANP32B			FAR2	CLPX	SYNGAP1		GSG1L	SYT1	CLVS1	PTGFR			SPCS3
	SYNGR3	PGRMC2			HSPA13	GJA1	CCL14		FXYD2	TNRC6C	CALCR	PHF20L1			MTF1
	NBPF4	CSRNP1			PDE7A	MBD2	MAFG		SGSM2	SPTY2D1	ITGAV	PGM2L1			ZNF208
	ADAM19	SCLT1			TFAP2A	MOB1B	SMG6		P2RY4	DGKH	COL8A1	GK			ALDH1A2
	ADAT2	VPS28			CNOT6L	EZR	CMTR1		EFNA3	TAB3	DNPH1	GLIPR1			RALGAPA1
	TP53	DLST			TMEM170B	C9orf40	PRSS36		PCDH1	DLG2	EID1	FBXO34			DNAJC13
	RBPMS	RAB1A			FAM49A	IFT81	TBKBP1		SNAPC2	SLC23A2	LIX1	SEMA6D			COQ2
	ADAP2	ABHD2			LLGL2	ZZZ3	FFAR3		MPI	TOB1	CCDC142	TRIM39			EIF5
	TSR2	ZRANB1			YRDC	LMO3	PIP4K2C		PRDM16	MBOAT2	TAL2	RANBP10			CLGN
	UAP1L1	ZNF367			SLC3A1	RAN	SLC24A3		HAX1	YPEL1	FAM53C	APBB2			EIF4E
	MYO15A	CDHR3			CRKL	YPEL2	EDNRA		RBM23	STK35	EVA1A	CNOT6L			CACUL1
	PPP3CB	ZNF148			GNS	SREK1IP1	ERGIC1		AMPD3	KMT2E	GORAB	TMEM164			ABHD2
	KCTD2	SIAE			SUMO1	HS3ST3A1	C15orf53		MBNL1	ZC3H12B	CAMK4	FOXC1			MMP16
	POLR2J2	PLA1A			SLC35A3	B4GALT6	EDA		NGFR	RAPH1	WDR64	AARS2			ZNF566
	PLEKHM1	EPCAM			FAM168A	CDH10	SLITRK1		MDFI	AREL1	ELF5	FLVCR1			CDK6
	LRRTM3	TNKS2			MSL1	ANKRD55	MS4A10		ITGA5	BANK1	CCDC152	SEMA5A			GPR161
	VAMP2	MNS1			TIMM8A	CXCR4	ARHGAP1		GORASP1	UBR7	FAM19A5	GPM6B			F9
	TLCD2	SLC18A2			ARHGEF26	RCHY1	ADCYAP1R1		MX2	HOMEZ	HS3ST1	CYP20A1			NR2E1
	RNF24	SEPT4			WDR5B	POC1B-GALNT4	ELP5		PPARD	RTCA	ZFP69B	SGPP2			LRRC19
	POLM	PRTG			ABCB8	TBX22	TRIM44		PLEKHB2	SLC35D1	TEDDM1	MYCBP			GALNTL6
	CARD17	C19orf12			STRIP2	ZFAND4	C12orf49		MFSD2A	MICAL2	PIP5K1B	SRGAP1			ALG1
	GDNF	LRP2BP			PELI2	FJX1	DLK2		STX3	SEMA4G	SDHA	VSIG10			RORB
	CTDSP1	HOXD13			C5orf49	ZEB1	MGRN1		ARID3B	ECE1	GPR82	TNKS			SLU7
	BLOC1S4	EFCC1			TP53INP1	TNFSF13B	SART3		AKT2	ANKS1A	SRSF3	HDAC9			FBXO28
	CLPS	BHLHE40			SHE	RYK	SIK3		CLP1	HUNK	NKRF	SZRD1			RAP2C
	FBXL7	CLEC1A			MED17	GABRB1	DCX		TRAF5	FGD3	PSIP1	ID4			GFRA1
	REM1	NHS			FOXK1	TMEM107	RGMA		KCNK5	MAPK6	BLOC1S6	ZBTB24			CDC5L
	PACRGL	PRPF38B			UBQLN1	VPS37A	APPL2		BMP7	SEC24A	UQCRC1	ZC3H12C			KLF3
	MARCKSL1	CREBRF			PKNOX2	SOX9	TBC1D16		TMEM127	BCL11B	STXBP5L	PLXDC2			DHODH
	THRB	UBE2G1			CHST2	SOCS6	PAQR4		TRIM3	ASH1L	LRRTM3	NOS1			PURB
	GPR26	TMEM50A			MCC	TAF9B	TTC7A		ADAT3	UST	SFT2D3	USP30			XIRP2
	AQP2	ERVMER34-1			CYTH1	DR1	CPS1		C14orf180	IL13RA1	TMEM161B	RIMKLA			MFAP5
	CCP110	UBE2QL1			PAPPA	SMYD2	REEP2		TMEM151A	TENM2	CUEDC1	NR3C1			PPARGC1B
	LURAP1	MTFR1			LINGO2	INO80D	FUCA1		TTYH3	SEMA4C	RALB	LARS			ARHGEF18
	GRHL2	SMAP1			VANGL1	CRADD	RXRA		FXYD6-FXYD2	NR1D2	DTD1	METTL6			GMFB
	CHST6	ZNF10			ANKRD44	MSMO1	SMURF1		GZF1	PHF8	ANXA9	AHCYL2			ADNP
	PRR14L	FST			USP33	C2orf66	AQP4		WASF3	FBN2	PRTFDC1	PTCH2			KCNN3
	ARRDC3	NPAT			NRF1	ENPP2	ACBD6		SH2B1	FBXL20	RMI1	RNF8			SRPK2
	PTGES3L	JAK1			MEIS1	LZTFL1	POU4F1		NF2	ZNRF3	PRKAA2	GPRASP1			STK38
	SEPT9	PPP2CA			BNIPL	RALYL	OLR1		MGRN1	LMOD1	ANKRD42	HECW1			ZMYND11
	SLC46A1	PHTF2			SREBF1	CAMTA1	PLEKHG4B		OGFR	PLN	TTC29	ZFYVE26			CDH2
	HEMK1	ADAMTSL4			ADCY5	TMEM167B	BLOC1S3		SLC44A2	SMLR1	FAR2	NEDD4L			ACSL6
	IL26	LRRK2			CCDC174	MPZL2	JMJD8		LTK	GNG4	CHCHD1	BMPR2			PTBP1
	POFUT1	GIT2			FNDC3A	NAB1	TTC39C		EPN1	PPP2CA	NUAK1	CNTD1			FGD4
	AGPAT1	MRRF			GIMAP6	TJP2	CEACAM8		WFDC13	RUNX1	C3orf36	ESYT3			GPR65
	NF2	ZC3HAV1			ANTXR2	MEX3C	ZNF148		CHMP1A	DNAL1	ZNF502	ALKBH1			PDGFA
	NSFL1C	RABGAP1L			TRIM32	EIF4E	GRB2		SLC35C1	PLCB4	TUBGCP3	EEPD1			HCN1
	ITPKB	PXDNL			RAD51B	ZPLD1	FOXJ1		LMO3	SLC24A1	GPR171	EIF5A2			RASAL2
	EPHA10	TNFSF15			ATF7IP	SLC44A5	S100A4		NPTX1	SPOCK2	OSBPL6	BDNF			ZNF793
	CPNE3	DPYSL2			TC2N	UBE2G1	KCNB1		IBA57	NUFIP2	SLAIN1	PRLR			ROBO2
	PGAP2	SNAI1			KMT2A	CSTF3	IFI30		TEAD2	GDAP2	FCHO2	LIMS1			DESI1
	TMEM233	ATP2A2			CTNNA3	NECAB1	CDH6		CYB5R3	PARP1	ZDHHC21	MEF2C			EYA3
	SLC36A2	DESI2			C12orf75	MBLAC2	PPP1R3E		LMO1	TBC1D30	CLHC1	REPS2			ITSN2
	DNAJC14	FAM216B			TSEN15	FAM81A	CD40LG		SHISA7	MRPL42	ATF7IP	TEX30			ATXN2
	PADI3	GK5			ZNF230	CCNYL1	PURA		ERI3	EIF1AD	ZNF230	C14orf28			GAD1
	TRABD2B	ZNF641			PKM	FTO	PPP1R9B		GGA1	TMEM135	LRRTM2	APOPT1			ICK
	BRPF3	NXN			PTBP3	LYRM7	FXR2		CRCP	BDH2	APOBEC4	RBM48			SASH1
	ANKS6	TAGLN3			FREM2	TMEM169	FCHSD1		PDX1	SLC2A12	RGS5	RMDN1			RAB14
	EHD2	LAMTOR5			TMEM132B	GOLGA8J	SEMA4B		ARPC4		FBXO34	COL5A2			ADAL
	TNFAIP8L1	TRA2B			CNOT7	FAN1	ACACB		PDRG1		ZFP36L2	GLUL			MOCS2
	KDM8	SUMO2			ZNF681	RNF138	MFN2		GNB1		RSBN1L	FIP1L1			SEC24A
	SLC5A5	KIAA1217			UNC80	MAFB	TPM3		OSBPL5		P2RY1	CCDC6			JMY
	LMAN2L	TAF2			CFL2	GNB2	VIPR1		MTA3		CASP1	CCNT2			ZBTB44
	IGSF11	UBE2W			POLR1B	ATP6V1G3	OSBPL1A		TMEM158		CERKL	AKR1D1			GPD1
	TFAP2A	TSC22D2			PFKM	ZFY	LDB1		KRT80		SH3BP5	KCNJ13			CCDC93
	SMAD6	KLF9			ABHD13	EMC8	YWHAG		GNB2		TMEM225	LEPROTL1			TRDN
	C1orf109	KDM4C			SPTY2D1	ICOS	OBP2B		KCNK3		KLHL6	G6PC2			MTPAP
	AS3MT	KIF16B			SMARCA1	CFHR5	CASP2		ACLY		SLC25A13	GTF2H5			MZT1
	SPHKAP	LMLN			ZNF518B	PLLP	SLC5A7		LIM2		ZNF430	SOD2			NLGN4X
	SIDT1	PPP2R5D			ZBTB1	MUC15	TRIM67		FUT6		C5orf51	BAIAP2			FYN
	MEF2C	SYAP1			NCAPG	PARP16	ZNF821		TRPC4AP		SRP68				PDE5A
	IL16	MRPL50			GMNC	HECTD2	SNX27		SLC12A5		MARCH6				LGALS8
	TMEM79	GEMIN7			PRR14L	ASB15	SLC5A9		WDR26		SPTA1				ANKRD29
	SEC63	SMARCA5			CENPP	ZNF616	MGAT5B		BCR		ACER3				BEND3
	MAVS	CAPN9			PTP4A1	TRUB1	MKNK2		ERBB4		SLC13A1				BNIP3L
	PTPN18	SPHKAP			COA3	CWF19L2	SLC34A2		ORAI2		ANTXR1				FASTKD2
	CACNA1I	PGGT1B			EFS	CYCS	SLC6A20		MIDN		SUMO2				CTTNBP2NL
	ACAP3	PCYOX1			XRN1	LRRC49	CAPN6		ARHGAP1		GPR161				NFAT5
	SLC7A5	PIK3C2A			BTRC	FERMT2	ANKRD52		MTRNR2L1		GTF2I				ADAM22
	LITAF	ETF1			USP47	TWISTNB	UBE2QL1		MIEF2		SERPINB1				RTN4RL1
	IPO9	TGOLN2			CHURC1	MYOM1	PTGES3L		RAB4B		STAM2				MBOAT1
	CREB5	GNB1			GAS7	CDKN2AIPNL	VWDE		FKBP14		HAPLN1				INTS8
	ZNF318	TP53INP2			SH3GLB1	RFESD	TANC2		SYT5		TPM4				BBX
	EMP2	SEMA6D			BTF3L4	SLC1A3	ZNF503		SRRM4		IL17A				SPARC
	TYW3	CLOCK			VEZT	PXDNL	ABCA2		PREX1		CFTR				POLR3E
	TNFRSF19	MYB			TPT1	ZC2HC1A	TRIM14		KAT2A		RANBP9				FYTTD1
	HSPB8	UBE2Q1			RBFOX2	NUDT12	KCTD9		RAD23B		CCDC88A				FRA10AC1
	NDOR1	STAG2			CELF2	MCHR2	EYA3		WDR45B		SP2				YLPM1
	TRPV1	TMEM242			VAMP4	IL1A	HOXB8		CNKSR1		CCNE2				YWHAB
	IQSEC3	SPCS3			HMGB3	HEMGN	CNNM4		GJC2		CXCR3				CXorf40A
	RYBP	POLDIP2			NUDT9	PDK4	PHEX		TSPAN9		ARRDC3				GHSR
	SGPP2	BRWD1			GRSF1	TFPI2	NKX2-2		SYVN1		BEGAIN
	ARF6	FLG2			NUFIP2	CCNA2	C12orf75		SLC50A1		CTDP1
	TPI1	DOCK2			ORC4	GLIS1	MMP15		SYTL5		UBE2K
	F2RL2	GJA1			ANKRD17	NOG	SLPI		CBX1		TEAD3
	DUSP19	TMPO			DCUN1D5	GCSAML	IL12RB1		CD5L		DNAJB14
	STK4	ZDHHC21			NRXN3	KLHL8	SCRN3		MED18		IDE
	ADO	CCSAP			CANX	MYL1	ITGA7		EPHB3		ITPR2
	GORASP1	DCAF12L2			TCTEX1D1	PPM1B	PI4KB		N4BP3		DNAJC24
	BCKDHB	ZNF350				GOLGA8H	SLC6A1		RNF44		PIK3C2A
	AK9	MEX3D				WDR47	C9orf116		DNAJC24		RANBP1
	CAMK2A	ANKRD49				COL21A1	BAAT		LRRC56		PPTC7
	GPR55	PATL1				PABPC5	LRCH1		TNPO1		NIPAL3
	SSTR5	NAP1L5				CDK6	TNK2		SCRT1		KIAA0355
	PTGIS	TXLNG				ARPP19	EIF4E1B		BRPF1		PICALM
	SLC25A42	NAA15				KPNA4	COL1A1		ZNF512B		UBA5
	ZNF557	MTDH				TXK	SLC6A19		WASF2		FBXO27
	PPP2R2B	PCSK5				CCL28	ELMO1		ZNF609		PARP8
	YEATS2	MXRA8				SGCZ	NR6A1		AMPD2		FZD3
	PLCXD1	SUMF1				DEPDC1B	SEMA5A		TNFRSF1A		RNGTT
	ISM2	RBAK				SMAD6	MDFI		HAGHL		NIPSNAP3B
	RIMS4	KLF7				FAM189B	FBXO41		DCLRE1B		AP3S1
	CHMP7	FAM192A				GADD45A	AGPAT1		WNT7B		PDGFD
	ARNT2	SLC9A2				PPP3R1	PPAN-P2RY11		SGSM1		RAB27B
	TPD52L1	RAB12				DGKB	RAP1GDS1		TTYH2		CD1E
	TCTN3	GPR34				ARPC3	CADM4		AHSA1		MIA3
	AKT2	ASB7				TMEM196	SYNPO2L		CX3CL1		FRMD7
	ENG	RIC8A				PEX10	PXMP4		PACSIN1		KCNAB1
	SUDS3	DCAF12				SPIN3	SPDYE2		SPG7		RNF125
	KCTD4	SH3GLB1				METTL7A	TERF1		KDM4A		NCOA7
	FGF1	OR51E1				PGD	FAM160B1		SUDS3		TMEM248
	ICAM1	ATG16L1				KLF9	MOGAT2		TNFSF10		AVIL
	WNT4	CSRNP3				COL15A1	IGFBP5		ELFN2		SYTL5
	GRK6	IKZF2				CPNE3	KPTN		FYCO1		RALGDS
	CMTR2	PLCL1				RAD23A	ZKSCAN8		RAB11FIP4		RBBP9
	ME1	ANKRD34C				ZNF658	BTN2A2		FUT5		TMEM135
	TGM2	ZNF865				VASP	ZNF217		CYP2W1		ZNF594
	TMEM170A	SYNM				C3orf70	CLEC4E		ACTR1A		PTGER4
	MPZL1	DNAJC6				PCBP1	BMF		PDGFRA		PLEKHA1
	UNC5B	NLE1				MIER3	HS3ST2		ESRP1		GALNT13
	DOLPP1	RNF128				PSIP1	HERC1		TANGO2		NLRP3
	FOXP1	ZNF280C				ARL8B	ROPN1		NARF		PTK2
	PHACTR2	CHMP1A				YAF2	ROBO4		ZNF280B		DLG1
	H6PD	CTNNB1				ZFP36L1	SHC1		PIK3IP1		SEC22C
	PDK1	EIF4H				LNX1	MKRN1		C19orf25		MAPK6
	SLC25A12	PPP1R3E				GKAP1	PIWIL3		DUSP14		DDX4
	TRPC1	CROT				CBX3	ATCAY		DMTN		C11orf54
	OPHN1	TPPP				CHORDC1	ATXN7L3		CNOT4		LRFN1
	FRMD6	ADAM22				CSRNP3	KCNA6		TFE3		RBMXL1
	STAT2	BACH2				HNRNPA3	MYOG		HMBS		ZBTB6
	RAB11FIP3	AFTPH				SH3GL2	SPDYE2B		TULP4		RAB9B
	SLX4	TCAIM				SPIN4	THG1L		IL27		ADAMTS18
	CXCL6	RIC8B				TTC39B	TOR4A		PLA2G2F		PTER
	ZBTB8B	TMED10				GOLGA8M	ALDH4A1		AQP5		LGR4
	KCNK2	ANKH				FBXL3	ZNF512		ADAM8		KCNK2
	INPP5B	COQ7				RANBP3L	HPCA		NSFL1C		ZNF483
	CALCRL	SATB1				TRMT10A	RTKN2		EPS8L2		ENOSF1
	DCHS1	PHLDB2				P2RY1	POU2F3		HSD17B14		CD4
	YAP1	DDR2				CCAR1	TEF		RIPPLY3		FCRL5
	SPN	KCND2				UXS1	UNC5A		BRD2		TCHP
	HAVCR2	TYW1				CCDC169-SOHLH2	HRH2		MARK4		ARL5A
	OR2L13	DUSP3				RNF207	COQ7		FCAMR		PI15
	PRODH	UNC5C				OPHN1	MTUS2		SLC25A10		CAMK2A
	SLC7A4	RAB22A				SET	MET		MST1R		SNRK
	SRRM4	PPP2R5E				N4BP2L1	ATP2B2		PRDX5		MCCC2
	MTHFSD	BMPR1A				LPAR1	TNIP1		KLK2		GAS1
	E2F2	ATRX				ZMYND19	SLC30A6		CADM3		HOXC8
	MSL2	MIER1				TSTD2	HIST1H2AE		IL17RE		UEVLD
	F8A1	AKAP12				SULT1C4	UNC5B		UBR7		AKAP2
	MROH6	SLC39A9				SLITRK6	SGPP2		TNFAIP2		ZNF80
	TGIF2	TMEM237				C6orf47	CLK2		DTNA		SLC25A32
	SLC1A3	TMEM51				ETNK1	PCDHB16		GPR37L1		TTC37
	COL4A5	PER1				TMEM50B	TIAM1		FARP2		CLIC4
	KCNB1	PKHD1				SERBP1	ZNF688		CRISPLD2		MSTN
	DAND5	ATL3				LYSMD3	ZDHHC7		ANKRD13D		AMMECR1
	PPM1A	BCLAF1				RGS22	PKD1L2		ATP6V1A		MDM4
	FAM20B	SYT15				NHLRC2	ACBD7		SH3BP2		USP38
	KCNIP1	SPEN				C7orf26	ZNF445		FOXO4		PLCXD3
	LYPLA2	TBCEL				SOWAHC	SPDYE1		NCKAP1L		NRAS
	FBXO33	PSD3				TXNRD1	SP6		DPH2		SNAPC5
	CRISPLD2	UHMK1				CNEP1R1	PPP1R10		CALU		POU3F2
	TULP3	MCTP1				SLC25A21	GDA		RNF2		GMCL1
	ALK	PARD6B				GNAQ	LIMK2		KLHDC8B		C1QTNF2
	TMBIM1	JAZF1				POU4F1	CALCR		XPO7		CHN2
	SRR	DNAH14				PARG	TP53INP2		SH2D4B		ZNF131
	APPBP2	SMAD4				ADPRH	CLEC4M		UBQLNL		PGM5
	INO80E	CAMK4				USP33	GRIN2D		NCKIPSD		IGFL3
	FBXL20	KLF12				GFPT2	HLA-DOB		PLEKHA6		UGT3A2
	TNFRSF11A	HECW2				TBP	KMO		SLC37A2		ARHGAP5
	FOXM1	EIF5AL1				KNTC1	LAMA5		AKT3		MMD2
	RNF157	CPEB2				MAF	DMWD		HMG20B		FEZF2
	IKZF2	PPP1R14C				ZNF260	KLK10		GPSM1		OXR1
	STS	DENND5B				RAB40B	BTN2A1		RELT		RIPK2
	MICU3	GLG1				ZNF91	POLR2F		MME		HTR5A
	NUGGC	MED13L				TMCO5A	DCTD		MTX3		DMC1
	RARB	SUFU				HERC4	ROBO2		RASSF1		SCAI
	KCNJ16	SHANK2				ACIN1	BRI3BP		PLP1		PDE8B
	CHTOP	BAHD1				RHOA	PITPNC1		AGPAT3		CAMK2D
	MEI1	TSPAN2				ZNF80	PREP		FXR2		NHLH2
	GYG1	ARF1				TRIP12	SRCIN1		SUPT16H		SLC36A4
	SLC7A14	PAK2				TMEM71	AKT1S1		TP73		YTHDC1
	VKORC1L1	FBXO33				BOLL	DLC1		CDK5RAP3		SPATA9
	PTOV1	PRRC2C				PPP1R14B	STOM		OBSL1		LAMA3
	DDA1	MLLT10				FNIP2	PARN		NFAM1		ZNF879
	RRP12	PALD1				OLR1	OPCML		UBE2G2		DHX33
	NT5DC3	QKI				ZNF484	PAPPA2		NFATC4		EGLN3
	DHH	ALDH3A2				FNBP4	ZDHHC20		TMEM120B		COL21A1
	EEF2K	NFIA				UGT3A1	ZFR2		SGPP2		ADAMTS8
	CKAP4	EFNA5				DNAJC27	IPMK		TRAF3		ZNF606
	GBP6	BBX				MRC1	GLG1		NEXN		KIF19
	RAD54L2	EVI5				TMEM254	PDGFRB		PDGFRB		SYNPO2
	SRXN1	NAA25				MAGEA10	TOM1L2		FOXN2		SDC2
	PODNL1	SNAP25				NUDT4	ZNF827		PRKCSH		MUC21
	MYRIP	ZNF385D				BBS5	MKI67		CDC42SE2		MAZ
	GABRA5	AREL1				CTSC	TOMM40		CAPN5		FAM214A
	NEFH	CYP1B1				KRIT1	SPRED2		PTPN14		EDNRB
	NFIC	ERLEC1				DUSP7	LRRC32		LRSAM1		RBBP4
	ZFP3	GPR137C				MAP7	KDM5C		EYA4		PALM2-AKAP2
	CACNG4	SLC35F6				FRK	PAOX		SLC27A1		USP43
	USP49	RBPJ				CALB1	PADI1		WNT9B		PUM1
	HLTF	ZNF704				RAD21	WFIKKN2		PTPN21		BTG2
	CD22	NPAS2				PPP1R3D	PHF8		CCM2L		GTF2H3
	C16orf72	TENM1				SMAD4	SMARCD1		CCAR2		TMCC1
	PHF21A	SPAG16				FMR1	KSR2		USH1G		UHRF2
	PCBD2	SLAIN2				VPS13C	PHF12		KIF21B		IGF2
	HIVEP3	MYSM1				IREB2	CC2D1B		TRABD2B		ARID4B
	SRL	HIPK2				PYCR1	OLFM4		LDLRAD4		H2AFY
	ZNF497	SACS				FKBP1A	PDPK1		VGLL4		MCM9
	RASSF4	NTNG2				GTF2A1	HPCAL4		HEMK1		TRIM8
	SUSD5	KCNJ15				ZNF750	SCNN1A		AGRN		PHF6
	ZNF395	CAMK2D				ZNF189	ACSL4		FBXO41		ANKRD13C
	ERLIN1	ZBTB20				RTN1	ATP1B2		HAP1		GPR15
	ABCB8	AP4E1				SLC25A24	CRTC3		RTN2		XDH
	KRT37	TCEANC2				PHF3	CACNA1E		CACNA1E		GOLGA1
	JAG1	KCND1				ANKRD12	MAP1B		ATG2B		GAS2L3
	KIAA0825	ZEB2				DENND4C	ZNF710		PPP3CA		TMEM117
	S1PR5	ITGA4				NLK	GNG4		ONECUT2		PANK1
	POLR2J3	ANKRD27				NEMF	ARFIP2		PACS2		MBNL2
	CDHR3	OSMR				REEP3	NSMAF		MEGF8		SFXN1
	KY	BICD2				GALNT1	ZSWIM5		PTPN3		GPR176
	ANKRD6	PLEKHA1				SCML2	SPDYE3		STAT5B		FBXW8
	FGF14	SKI				NEK7	IL17RD		STARD8		RASGRF2
	VKORC1	GNL3L				CXXC4	ONECUT2		DAB2IP		STC1
	GOSR2	NCOA3				PPP3CA	MAPK6		PTGER2		VSNL1
	HRNR	MMP16				MFAP3L	DRP2		DUSP8		FBXO28
	SLC25A23	DOCK9				TOMM20	CDR2L		LTF		ATF3
	FAM98A	FAM126B				TGFBR3	FBXO44		MBD6		CCDC117
	ZNF490	ZNF555				DESI2	CBX5		ATP6V0B		PRPS2
	PHF1	CBFA2T2				EML4	PMP2		PIK3C2B		CD2AP
	SHCBP1	RORA				PIK3R1	YIF1B		ZBTB43		ADRB1
	PROSER2	TET3				TRAPPC8	ITGBL1		ATG2A		NAALADL2
	CAV1	NFAT5				SETD6	ATXN2L		ZER1		NDUFA5
	BPGM	TNKS				MZT1	VPS18		UNK		HECTD2
	CASC3	FNIP2				SUB1	ITPKB		FAM89B		FAM78B
	TMEM127	FRY				OXR1	RALGAPA1		HOOK3		RNF144A
	GABRA1	NTN1				B3GAT1	MGAT3		FBXO28		BCL7A
	TCTN2	RRP8				THAP1	C6orf89		GPATCH2L		FAM155A
	ZNF609	ZC3H12C				MED13	RAB7A		CABLES2		SLC7A14
	SPEF1	SLC9A7				COG3	KDM6B		ARID2		RNF4
	AIDA	EXPH5				KAT2B	UMODL1		DHX35		ALX4
	MCIDAS	TKT				FAM149B1	PCLO		TNFRSF14		SLC35B4
	PVR	WDFY3				YIPF6	UNC13A		HTRA4		SORCS1
	PPP6R1	MPZL2				DTD2	TRABD2B		KCNQ4		UBXN10
	KIF1C	TMTC1				FILIP1	OPRK1		UPF2		DNAJC12
	MAST3	CCDC85C				RAP2A	NECAB3		PSD		DYRK1A
	EGR3	NSD1				TLL1	AKT3		TBC1D8B		ROBO1
	RNF125	RUNX3				PAG1	HDAC1		DNAH10		WDR47
	AKAP2	PTER				TET1	CCDC113		ARSI		STK3
	MED17	SPTY2D1				ALKBH5	CCDC85C		PRKCI		ZNF737
	WWC2	ARHGAP31				CNBP	SHB		SLC4A4		SFTPB
	PRICKLE3	ITPR2				ILF3	ZNF304		TSHZ2		GK5
	MUL1	CLDN1				CDK1	BBX		SDC3		ZNF257
	SLC17A5	DBT				C18orf25	KPNA2		GRK6		TRIM26
	PAPLN	UBASH3B				MARCH3	AMIGO1		LDHD		ABCC4
	ZBTB14	IVNS1ABP				CD72	IQSEC3		ADAMTS10		GAB1
	ATP8A1	SLC44A1				ZC3HAV1L	TNRC6B		KCND3		STAG2
	IL6ST	MAP1B				ZNF529	FBXL20		F11R		KPNA1
	FCRL3	LSAMP				ACADL	FRAT2		SYT7		SIAH3
	ZNF432	GGCX				FAM76B	SEC14L5		HIC2		CHST11
	S1PR2	RABEP1				TMEM80	NACC2		HIPK1		TMEM184A
	KCNC4	SV2C				C21orf91	SPPL3		NFIX		FSD2
	BBS5	MGAT4A				KCNN3	PPP2R3A		ZMIZ1		CRTC1
	XPO4	INTS6				DAXX	P2RY2		MYT1		PAPOLG
	P2RY2	DYNC1I2				PROS1	HIC2		PLCG1		HNRNPDL
	DACT3	SRSF12				GABRG1	SUFU		ZMYM3		KCTD4
	CCR2	CTNNA3				DDHD1	ZNF737		ARNT2		SMTNL1
	ARF3	KMT2C				CYP1B1	ZNF426		IQSEC2		SLC12A7
	SEC14L1	PEAK1				VAMP2	FBXO45		TMEM178B		ANKRD34C
	CYP26B1	PGM3				KIF2A	CLDN23		ALPK3		ZNF74
	PALM2-AKAP2	PPP1R9A				ZFPM2	ZZEF1		RANBP3		C6orf120
	SGPL1	RCSD1				ZBTB5	ANKS3		ATXN1		PGM3
	ZC3HAV1	ZER1				RNF11	IRGQ		ZNF473		TSTD2
	TCF12	FLRT2				GABARAPL2	CIITA		MRPS18A		CCPG1
	PTEN	CUL4B				ARHGEF35	EIF4B		KCTD1		NRXN1
	VAT1L	DSEL				CLEC1A	DZIP1		MLLT6		UTY
	IRGQ	ZBTB44				SLC39A10	ARRB1		LENG8		PHF12
	BTBD9	SLC16A10				TCHP	ATXN1L		ARRB1		KIF5B
	NRP1	MECP2				PIAS1	ZNF554		DHDDS		PERP
	CDS1	WDHD1				KLHL4	ANKS1B		KCNA6		GPR183
	SAMD14	TMEM53				AHDC1	C1orf116		RNF169		CYP4F11
	MIER3	CISD3				FAM49B	WNT9B		CTIF		GRIP1
	AGBL4	APOPT1				CNGB3	FBXO31		HDAC5		GSTCD
	SLIT2	HNRNPUL1				SLC18B1	TMEM127		SLC43A2		TLL1
	HCN4	ZNF639				CAV1	ZMYND11		HEXIM1		IGSF11
	F3	PRICKLE3				FZD3	ZNF736		SLC6A11		GREM2
	EPB41L4A	FNDC3B				CHMP4B	PACS2		ADRA2B		GABRR1
	APOL6	TEP1				MED28	VANGL1		CTNND2		PKD1L1
	ALDH4A1	B3GALT6				SLC25A32	RHOF		IVNS1ABP		TRIM58
	TOX2	OSBPL8				AAK1	FBXO42		EEPD1		TSPYL5
	APOBEC3F	ACVR2A				ZNF264	ZNF592		PLB1		FUT9
	KDM2B	PLXDC2				GPC4	RSPRY1		NAV1		WDR72
	SLC9A7	RPL13				DYNC1LI2	HOOK3		PHF21A		IRAK2
	NTN1	INPP4B				SMARCA1	CLCN5		ANKH		TRIM9
	WDR78	TYW5				LARP1B	ARNT2		LRPAP1		FAXC
	ZNF451	PRKD3				RYBP	PDLIM4		CERS5		SYT14
	MDGA1	ODF2L				DCUN1D1	FAM104A		FEM1C		FGF12
	MMP24	MTMR3				TAF4	RIMS2		TNRC6B		PUS7L
	USH1G	HSBP1				SLC30A1	CTNNA3		SPTB		ZBTB41
	SEMA4B	SLC9A6				INPPL1	RAB14		EHMT1		ZNF117
	PSD3	HDAC2				RAD23B	CMTM4		ZNF507		EPC2
	RHOQ	FGL2				GFRA1	CDCP1		NCAPH2		KIF18A
	NOS1	ERP44				BMI1	SDK2		CCNY		HNRNPF
	CAPN5	HIC2				FOXJ2	NAV1		IST1		ZNF24
	SH3PXD2B	GTPBP10				MIER1	AFF2		DGAT1		BMP3
	CCDC113	BNC2				ZNF492	SCAI		EMC1		HAS2
	SEC16A	SPECC1				KBTBD8	AAK1		MICALL1		CCDC141
	TRAF7	OSBPL9				THAP2	CELSR3		HMGB3		PLAG1
	LHX6	LRRC6				COL25A1	MEF2D		C8orf33		TMEM178B
	CAPRIN2	PPBP				PHF12	TLL1		MAPK14		MOB1A
	UBA52	SIGLEC7				PPP2R5E	SLC6A11		ANKRD17		SYT4
	KPNA4	DCSTAMP				TTC38	ADCY9		KCNH1		HGF
	DPYSL5	DCUN1D5				ZNF582	GAS7		MTFMT		ACSL4
	AAK1	TNFSF8				TTC31	C1orf56				KLF9
	SPRTN	CLEC2B				NFKBIA	AMER1				CALCRL
	DAB2IP	F11R				ZDHHC21	C18orf54				RRN3
	ZNF500	SH3TC2				MPP5	NR3C1				F3
	AHRR	RPS27L				GPR22	ZNF701				BACH1
	ZNF514	OASL				MCC	MTHFR				NLRC3
	ALDH7A1					JAKMIP3	SEMA6A				ADARB2
	CXXC4					CPEB1	GNG7				TRHDE
	SMPD1					TTC13	ARMC8				SRSF11
	CRTC1					PIP4K2A	RANBP2				UNC5B
	CHL1					ARHGAP21	ACOX1				GIPC2
	MID2					GEN1	ATF6				TSPYL4
	CBFA2T2					KLHL15	TFDP2				RTTN
	CBX5					CHMP2B	MIER1				FBXW11
	CALM3					PIK3R3	CCPG1				PIK3AP1
	NSMF					KCTD14	RBM12				TIAM2
	PLEKHH2					IL12B	RAB43				KCTD16
	SYS1					BZW1	RHBDL3				KBTBD11
	SLC22A15					ANKRD18A	RMND5A				FNDC3A
	SLC26A1					CXCL14	ARSA				TMX4
	INTS2					ONECUT2	LONP2				L2HGDH
	MARK2					PCBP2	C5orf63				C10orf88
	TCHP					PSTPIP2	GID4				TMEM255A
	TNC					GPR75	POP4				COLEC12
	CD109					EEF1A1	XPNPEP3				DNAJC27
	FBXO41					FER	SLC44A1				ERBB4
	RBM19					ROBO2	PHF21A				CPEB2
	C14orf132					ZNF333	ZBTB25				MEOX1
	FIBCD1					SCN9A	TNRC6C				NR1D1
	SPATA13					LEPROT	CYB5B				USO1
	PLEKHA6					FAM84A	SAP18				HHEX
	ERLIN2					TCF7L2	BTN3A1				RAB2A
	PLCB1					ARID4A	GPR65				EME1
	BBX					CD164	FGF5				RNF141
	GLG1					EDIL3	FECH				KPNB1
	PHACTR4					SV2B					ZNF583
	NCALD					KLHL24					GRHL2
	UBE2O					EXOC1					TMTC1
	PCDHGA12					N4BP2L2					DYNLL1
	SNX27					NFIB					GLIPR1
	FOXP3					UBE2L3					FAM131B
	RFT1					WDFY1					SOWAHB
	HSF5					RHOB					KHDRBS1
	SMIM12					CXADR					SERPIND1
	LIN28B					SEPSECS					KIAA1522
	ZNF587					POU4F2					PACSIN1
	TMEM222					HLF					ZNF764
	KPNA6					ZPBP2					TUBA4A
	FAM155B					SEPT7					ZNF853
	FOXN3					MTPAP					MYL2
	ZMIZ2					TMEM38B					USP15
	RIMS3					TMEM123					SLC1A2
	ERN1					ARHGAP6					TMEM221
	PPARGC1B					TP53BP1					BPTF
	SMURF1					TRIM33					ZKSCAN1
	EPHA8					AZIN1					MS4A10
	SMARCAD1					SERINC5					ZNF432
	RAB11FIP2					TMEM158					FBXO45
	SZRD1					PHF20L1					CD164
	AK3					RNF19A					CCNC
	NFATC2					TRPC1					CTDSPL
	NDE1					ACTBL2					NFE2L3
	ORAI2					KIAA1107					TBC1D23
	MECP2					FAT1					ZNF697
	ASTN1					ZBTB14					CISD1
	GAS2L3					ECT2					SENP1
	MMP15					GNAO1					KREMEN1
	SLC6A4					NINL					SP1
	ACOX1					PDE7B					RNF19A
	MARCH8					RAB22A					FBXW7
	MBD3					KDELR2					CASP14
	PAFAH1B2					DGKH					KIAA1257
	AHI1					USP38					SOCS4
	SDC3					HSPA12A					NCR3LG1
	CDC5L					RAB11FIP2					DCLK1
	LZIC					PCBP4					MOB3B
	SLC24A4					CTBP1					ELMOD2
	SLC23A2					EPC1					CREB5
	BIRC5					ACVR1C					MTHFSD
	CHD9					SPATS2L					SPIN4
	RPL28					INHBB					KDM5A
	SV2B					PPP6R3					ZNF292
	DNAJC3					WASF1					FGFR1OP
	TRAF3					BCL11B					ERCC4
	ANKRD33B					PLCXD3					TBC1D22A
	ATG7					YES1					KIAA1958
	RC3H1					TAPT1					ZNF143
	IKZF3					LONRF2					POM121C
	ARIH1					TFDP3					GALNT15
	PAK1					HS3ST3B1					SLC4A7
	XYLT1					KIAA1841					DYNC1I1
	BAHD1					RFPL4B					PLCB1
	APBB2					KLHL9					TEF
	TOR1AIP2					MTHFD2L					PPP2R2C
	ZNF662					CYBB					NLGN3
	ADARB2					BRWD3					C9orf66
	GREB1					LIN7C					MUC13
	ASB6					PRKAR1A					SMAD3
	ANKRD40					SREK1					SNRNP48
	PPP2R5D					VHL					ITGA1
	SKIL					DPH6					PRLR
	RASGRF1					ADIPOR1					EIF4B
	ARFGEF1					CFTR					ZC3H10
	FASTKD2					ADAM17					FOXA2
	PEAK1					ASAH1					ANKFY1
	RORA					EPHA5					ZNF747
	SRF					ZFX					TMEM132D
	SNTB2					STAG2					POU2F1
	PML					ZC3H12C					APPBP2
	PGAM5					PGM3					CMTM6
	TBC1D16					HLTF					ANK2
	GSG1L					B3GALT2					CDC42EP3
	IGF2BP1					FPGT					SPPL3
	RRP15					EGFL8					TNIP1
	ULK1					PIK3CB					CDK6
	PTPN14					NFAT5					CUL4A
	CPSF7					C3orf38					CDC5L
	JAG2					HNRNPH2					ASXL3
	ATP8A2					DCAF4L1					DCX
	ABHD2					APOL6					FAT3
	PRKCA					FAM161A					MRGBP
	DCBLD2					TUBE1					CHUK
	RET					PGAP1					MYSM1
	CENPN					SRSF1					PHYHIPL
	SSH2					CHSY1					ABI2
	OTOF					KDM1B					TMEM33
	BCL11B					RPL36A-HNRNPH2					MAP2K7
	ZMIZ1					SMNDC1					JARID2
	PPP1R12B					PDE10A					CHMP4B
	C1orf210					PCGF5					PTGER3
	PLEKHG2					ZSCAN30					CUL2
	ZNF850					IKBIP					DCP2
	UMPS					ZNF277					SHISA9
	CSNK1D					GABRB2					USP13
	WWC1					WNT3					AP3B1
	NRP2					CNTN1					GRM5
	SEH1L					TC2N					PITPNA
	BRIP1					TMEM129					ZNF320
	SORCS2					PTEN					ARHGEF26
	TRMT13					DIRAS2					HELZ
	PDGFRB					FZD4					ZNF155
	HOOK3					ANTXR1					BMPR2
	BCORL1					SDC2					SLC2A12
	ID4					TMEM41B					KSR2
	TUB					CSMD3					THSD7A
	PNPLA8					TOR1A					MMP16
	SAR1A					PNISR					FADS1
	CYP20A1					ZDHHC17					FAM227A
	AP4S1					CCDC68					ZNF711
	RLIM					PRKAR2B					PLEKHH1
	FOXP4					TP53INP1					PPP1R12B
	RHBDL3					IFT80					TMEM242
	ZNF704					CD47					A1CF
	SIKE1					G3BP2					EBF1
	DOCK5					TNPO1					ELOVL4
	ZZEF1					SERTAD2					ZNF570
	SLC4A8					MBNL1					WIPF1
	ISG20					COMMD3-BMI1					OTOGL
	PDE4D					MTX3					NR4A2
	ANGEL2					NRG1					C21orf91
	CLCC1					NFE2L3					FIGN
	PAQR5					MTUS2					CDYL2
	PDXK					ZNF569					NUP62
	RCSD1					LEMD3					KIF1C
	PACS2					CTTNBP2					DCC
	CASZ1					FAM169A					WBP1L
	NXT1					STAM2					RNF168
	EFHC1					CEP85L					IRAK3
	TFCP2L1					ENOPH1					SEC23IP
	TPRG1					PRRC1					RORA
	IRF6					FAM53C					RICTOR
	SMARCA5					HAPLN1					PRUNE2
	BRAP					VARS2					APLN
	KRR1					SMARCD1					EGFR
	EPC1					LEPR					KPNA6
	ALDH6A1					OSBPL10					SLC16A7
	SLC43A2					SEC62					PXMP4
	SARM1					SATB1					TRIM33
	HNRNPD					CAPN7					TAOK1
	NUDCD3					BMP2K					SGCD
	FSTL3					SLC25A44					AFF4
	PRPF38B					RB1CC1					CSNK1G1
	MED12L					DNAJA2					TPH2
	ZNF326					PROX2					TC2N
	ZNHIT6					SHPRH					PSMA5
	M6PR					PPIL4					CHL1
	XPNPEP3					ESYT2					INVS
	FADS1					DPY19L4					BEND4
	TFDP2					TAB2					TACR1
	RBMS2					SCAI					CLIP3
	THEM4					LCORL					CLOCK
	PLAC8					PCLO					LMAN1
	NUFIP2					DCT					HDAC9
	TMEM176B					FHDC1					PRDX6
	CPSF2					GRIK2					TGFB2
	IFT57					CNST					SEMA6A
	SLCO5A1					LPP					XIRP2
	UQCC2					PAFAH1B2					CHIC1
	KHK					RLIM					ABLIM1
	CDH11					ADIPOQ					ZNF704
	SAR1B					TDG					PREX2
	SBNO1					TSN					KIF13B
	PTGFRN					KCNS2					NR6A1
	IFT122					F9					TBRG1
	ALG9					UGT8					ZNF596
	PSMD9					AASDHPPT					KIF13A
	SF3B3					L2HGDH					BACE1
	GTPBP10					KRAS					SLTM
	MTDH					SPRY2					TTBK2
	IST1					STK4					ZNF91
	ACVR2A					CSDE1					PHLDA1
	PAK2					PDS5B					UNC79
	TMEM37					CTF1					TTC28
	USP3					GLRA3					CAPZA1
	PIK3CA					SLC1A2					AP5B1
	TFB1M					VIM					BTD
	DYRK3					KCTD12					PDE3B
	GPANK1					SOAT1					SNX9
	ANGPT4					SLC30A6					FAM126B
	MCTS1					KDM4C					GALNT10
	MRPL11					DDX21					TLL2
	TMEM219					PRKAA2					ANTXR2
	ACP6					ABCB10					SKA2
	TMEM72					RNPS1					PPM1L
	SMIM17					SLC28A3					MALT1
	FUS					RAPGEF6					GRHL1
	LRRC31					G2E3					UNC80
	PLGLB1					THOC2					TMEM132B
	PLGLB2					GNB4					LRRC8C
	MYBPC1					MYEF2					PSMC2
	ARMC3					SMAD5					TSC22D1
	VWA2					TAOK1					KAT2B
	ZBTB20					RMND5A					IGF1
	ARGFX					DBT					CDKN2AIP
	GPI					BCOR					RNF19B
	PNPLA2					ZNF713					IFRD1
	SH3TC2					GPR63					MAP3K7
	PBX1					ACTR6					MTMR4
	SEC23IP					CPT1A					NKD1
	CCNT1					IPO7					ATP7B
						ZBTB33					SLC4A8
						SLC1A1					DNAJB4
						ZNF304					STX17
						ZNF22					PPP1R9B
						DLX1					RIMS2
						C2orf68					ATP2B1
						FRS2					MGME1
						SS18					BBX
						EDA2R					MYOCD
						DDX3Y					NANOS1
						MREG					TNFRSF11A
						ZFAND3					OXNAD1
						UBE2W					RIMBP2
						MITF					TRIP12
						TET2					BRWD1
						NFIA					ZNF773
						TAL1					ACVR2A
						ARL6IP1					ISPD
						STYX					NAPEPLD
						SPRED1					ATXN1
						TAF5					TAB3
						DIXDC1					NRP2
						SF3B3					CHTF8
						KANSL1					MAP3K1
						LTBP1					ZFHX3
						ZDBF2					NCOA2
						IFI44L					SHE
						GABPB2					JAKMIP3
						PIAS2					PKN2
						F2RL1					KMT2D
						ZFAND5					HLTF
						FNDC3A					KIAA1210
						PIGN					MARCH3
						ITGAV					ATP1B1
						PALM2					SRGAP1
						TBL1XR1					SMC4
						PLK2					PTPN14
						XRN1					SEC62
						ZNF681					PARVA
						LRRC58					REST
						PDE4D					FMN1
						ZFYVE28					TSHZ1
						TMEM245					CACNB4
						MAPK4					HSPA5
						NBR1					CNTN3
						TMEM192					FBN2
						ABCC2					TBC1D30
						ABHD6					ESRRB
						DHX33					SRGAP2
						PAPOLA					CYTH2
						ZFHX3					MAP3K2
						TMEM135					SORL1
						MMD					PCMTD2
						KDSR					FLVCR2
						KLHL28					CCNA2
						ZMAT1					ZBTB24
						ALDH1A2					CDH6
						HOXB7					ANKRD12
						SLAMF1					SLC2A13
						SLC2A13					FREM1
						PHTF2					HNRNPU
						PTGER3					FBLN1
						SPOPL					ZNF652
						BCL2L15					KLHL5
						C16orf72					RAPH1
						ENPP1					CLIC5
						KIAA0754					CHCHD7
						EFNB3					MSI2
						OPRK1					DARS
						EVI5					USP25
						PAX6					PURB
						IKZF2					PNMA2
						FSTL1					STXBP5
						KLF7					ELAVL3
						TRAM2					SLC35E3
						HMGCS1					USP49
						STRBP					LY75
						CDK13					BBS9
						DMRTB1					ANKRD40
						PHF6					FMNL3
						KCNIP4					PDZD2
						PPIG					ZFP36L1
						PDK3					MLLT3
						MOSPD1					NAV1
						CLINT1					VPS54
						TXNDC9					ZC3H15
						EBF1					GLIS3
						CBL					SMAD4
						HIF1A					TMEM106B
						RNF6					LRRC28
						WDR17					NXPE3
						ADSS					SDK1
						BCAP29					CDC27
						FAM76A					SLC22A23
						PGM2L1					AASS
						AFF3					AGAP1
						TIA1					ZDHHC5
						CREB5					NOTCH1
						C2CD4B					TSPAN31
						PTPRG					DOCK3
						CSNK1G1					BICD2
						TXLNA					EIF5
						ZNF148					CLMN
						DCTN6					RASAL2
						PITPNB					FAM120B
						DYRK1A					TET2
						PAK4					SMIM21
						MSL2					ANK1
						PTBP3					PTGFRN
						CLVS2					ERC1
						PCM1					GFRA1
						PHC3					IRF1
						OTX2					CTTNBP2NL
						PPFIA2					TNIK
						ATP9A					NLK
						TBC1D30					KCMF1
						WDR26					SPTY2D1
						ERLIN2					SOD2
						SAMD8					ORC5
						RAPH1					PDE12
						SLBP					SLITRK4
						IGSF9B					SLC11A2
						MBP					PDS5A
						DNM3					DGAT1
						DPP8					HNRNPR
						HMGXB4					MND1
						USP12					IGFBP3
						LCLAT1					BCCIP
						RTN4RL1					SMOC1
						MEF2A					ERCC6L2
						MAN2A1					SMURF2
						PPP1R12B					SGIP1
						FAM20B					FAM104B
						DUSP19					PNN
						CEPT1					DKK3
						ERAP2					TBL2
						ADD3					CAPN2
						CUL5					ETV1
						TSC22D2					PON2
						SLC26A4					TXNDC17
						CACNB4					ITPA
						PURB					PAK2
						ARL4A					C1orf52
						ELAVL2					NFYA
						SESN3					TJP1
						FOS					BNC2
						C8orf37					CCDC107
						ORC2					DNAJC30
						FBXL5					AKR7A2
						SLC16A7					ANKRD52
						PTAR1					SLC38A10
						EPM2AIP1					PAPOLA
						SDE2					CADM1
						TSPAN2					FGF5
						CREG2					ACYP2
						SNX27					CACNG2
						TMED7					SLC25A4
						ABCC9					INHBC
						ADAMTSL3					HTR1A
						PEX5L					PRH2
						FOXO3					IL5RA
						CHD6					MCTS1
						PCDH19					SH3TC2
						RAPGEF5					POU2F2
						ZNF578					SDHC
						HERPUD2					PAM
						ESCO2					FPGT
						CAMK1D					IFIT1
						RBMS3					ZNF865
						IGF2BP3					TRDN
						WASF3
						SLC43A2
						DZIP3
						ZNF280C
						ZBTB44
						FAM118B
						SPOCK1
						EIF5
						MACROD2
						DCUN1D3
						ZBTB41
						ATAD5
						MYO1B
						ACVR2B
						SRGAP2
						ELAVL1
						SLC4A4
						ZNF670
						SORT1
						ZFHX4
						XK
						SEC22C
						ZYG11B
						HCFC2
						SETDB2
						ATXN1
						IL17RB
						C1GALT1
						CDYL
						POU2F1
						TOP1
						TRAPPC10
						ZNF281
						PTPN4
						ARHGAP29
						ATL3
						C1orf21
						ZFP69
						MDM4
						SPCS2
						NOL4
						MBTPS1
						FBXO45
						SLU7
						FAR1
						ST18
						MSTN
						ACTR3
						PAPPA
						FAM120A
						TAB3
						MAP4
						PPP4R2
						LCP2
						CTNND2
						DKK3
						ZNF608
						IL1R1
						BCAR3
						TTC26
						CCDC117
						RPS6KB1
						RAB27B
						C16orf91
						FOXA2
						HELZ
						SH3RF1
						ADAM10
						BMP3
						DTL
						SUDS3
						RALGAPA1
						OCLN
						C6orf223
						AMER1
						FLI1
						PSMD11
						STK17A
						KIAA1147
						FUT9
						PPTC7
						PRDM10
						BDP1
						ZNF12
						WNK3
						LYST
						SEPT10
						ST8SIA3
						FAM13A
						PAK2
						MTDH
						TRIM44
						TTC30A
						NEDD4
						ATF7IP2
						LSM12
						ITPR1
						IFNGR1
						NR3C2
						MEX3B
						COA1
						GFPT1
						KMT2D
						TNRC6B
						ATP8A1
						LMLN
						PROSER1
						HNRNPC
						HS6ST2
						CEP97
						WDR89
						ZNF280B
						SPIRE1
						CDK19
						SYNE2
						ZNF711
						CREB3L2
						REST
						RNF14
						PJA2
						PAIP2B
						YOD1
						PLAG1
						RNF212
						STT3A
						PMPCB
						HSPA4
						ATG3
						RIMKLB
						FGF2
						KCNJ3
						TLR4
						ASB4
						BHLHE22
						GPAM
						METTL16
						FRMD4B
						CNTNAP2
						CLASP2
						SP3
						GYG2
						BRWD1
						RCAN3
						MYO5A
						ADCY2
						ABHD13
						ATXN7
						FGF5
						CLEC2B
						ATXN3
						TBC1D19
						CARD8
						FUT11
						GRK6
						YY2
						GALNT4
						FBXL2
						PRLR
						NAA30
						POU3F2
						GCLC
						SEL1L
						DCUN1D5
						HNRNPR
						WNT5A
						CDC27
						WDR37
						FBXO28
						FBXW7
						ZNF275
						IRAK1BP1
						PLCB1
						FAM53B
						CCSER1
						ANK2
						SLC4A10
						TMEM132B
						ZNF106
						KANSL1L
						RALGPS2
						MAP3K2
						PDGFRA
						NOS1AP
						DPY19L1
						U2SURP
						SPATA13
						RAD54L2
						SLC25A53
						ENAH
						ARHGEF26
						RICTOR
						UTP23
						YWHAZ
						CBLN2
						PBX2
						TEAD1
						CELF2
						ZKSCAN8
						GLCE
						RC3H1
						AFF4
						LRRTM3
						TRPM3
						MN1
						PNPLA8
						PELI2
						ZNF41
						UGGT1
						GOLT1B
						FYCO1
						EHMT1
						GPLD1
						HNRNPH3
						CPD
						SLC19A3
						KLHL25
						ADAMTS5
						UBR2
						TSC1
						EYA4
						RRAGD
						FBXO22
						SOCS4
						CPSF7
						BMP7
						PIKFYVE
						DPYSL3
						RNF38
						GNL3L
						VEGFA
						PPM1K
						CLOCK
						TGFBR1
						CREBRF
						SPATA5
						NAA50
						TM9SF2
						HBS1L
						C20orf197
						CLCA2
						JPH1
						BMPR2
						FAM168B
						ENTPD1
						SLC30A5
						ELK4
						AKT1S1
						GNS
						RGS4
						ZNF230
						FAM199X
						PRKAA1
						SYNJ2BP
						NRXN1
						GSK3B
						SEPT2
						SETBP1
						ZNF716
						CCDC71L
						ADAM22
						JMY
						RAB23
						MAPK10
						PEX13
						C2CD2
						PTGDR2
						CADM2
						SLCO4C1
						MYT1L
						TRIM2
						AMPH
						TRPC5
						DSCAM
						STOX2
						GABRA4
						KLF6
						PRKCE
						NFATC2
						ID4
						FGFR3
						UBL3
						ATP2A2
						CACYBP
						CELF1
						C6orf132
						FGFR1OP2
						TMED5
						PRCP
						SGPL1
						MTF1
						RNF111
						SNAP23
						WDTC1
						CHD9
						GLI3
						IER3IP1
						TCF20
						NIPBL
						CDC42BPB
						REEP5
						KLF8
						HACE1
						SRSF11
						PCGF3
						ATXN7L1
						TMTC1
						OTUD6B
						ZNF652
						RNF168
						DIDO1
						AGPAT5
						MAP2
						CLTC
						PIK3CG
						TRIP11
						DCDC2
						ADH5
						LSAMP
						ZNF736
						ZNF519
						WDR36
						ENOX2
						TBC1D16
						STXBP5
						TRAF6
						ERCC6
						CBX5
						XPR1
						NUP214
						ARRDC3
						HERC1
						EPB41L4A
						MMAA
						SLC45A4
						PCDH7
						AEBP2
						CREB1
						SIPA1L2
						AQP11
						PCDH11X
						TOP2A
						TMEM255A
						BCLAF1
						ZEB2
						ATRX
						ZNF347
						NFATC3
						RNF19B
						ROBO1
						XPC
						HOOK3
						TRPM7
						STRN
						ADAL
						SLC15A2
						MID1IP1
						SGIP1
						IKZF1
						PATZ1
						ZNHIT6
						CPSF2
						LIN7A
						TMEM39A
						ANGEL2
						CBX1
						HDAC9
						NUFIP1
						PNPLA4
						CELSR1
						SPTLC3
						FBXO33
						MUC19
						PRKX
						LRRC8A
						ALPK3
						COL19A1
						TNRC18
						SYT15
						RGS3
						ITGA6
						LPL
						NAV3
						ANKRD11
						AMPD3
						HCN1
						PRDM2
						KCNC1
						GOLGA4
						SYNDIG1L
						CRMP1
						SUCO
						SLC6A11
						TKTL2
						ATP2B3
						KCNH8
						RAPGEF2
						ARHGAP19
						ZC3H12B
						ANKS1A
						MICAL2
						SLC4A5
						FMN1
						EPAS1
						MANEAL
						MAML1
						RAB11FIP4
						SYNCRIP
						SIK1
						ANKRD33B
						GLS
						CNTN4
						FAM126B
						AMFR
						THRAP3
						SYNJ1
						ATG2B
						MRPS10
						CCNT1
						CNKSR2
						INSIG2
						CAMSAP2
						GUCY1A2
						ARHGAP28
						NOTCH2
						DCP1A
						ALS2
						PTCH1
						SOS1
						RPRM
						PLEKHM3
						ATAD2B
						MEX3D
						RPS6KA6
						ZNF451
						SLC25A16
						ELOVL5
						HIF1AN
						ZNF19
						SCG2
						DUSP3
						TWSG1
						BACH2
						MTSS1
						SLC44A1
						URI1
						AP1S3
						DBN1
						ACER3
						RBM24
						WWC1
						RPGRIP1L
						UBE2K
						TRMT5
						SLC25A36
						C12orf73
						ARHGAP5
						RAB30
						PPM1A
						STK39
						LRP6
						ZXDB
						GEMIN5
						ZBTB7A
						HNRNPUL2
						GLCCI1
						PTK2
						CABLES2
						SNRPD3
						TCF24
						PPP1R9A
						COL5A1
						THUMPD1
						KDM6A
						GCNT1
						DSEL
						RAB31
						NSL1
						TMEM248
						C5orf30
						HDAC4
						EIF4E3
						DDX3X
						FAXC
						CNOT6L
						THBS1
						GATA6
						MPZL3
						TBX18
						EDEM3
						CWC15
						BTBD3
						DGCR8
						ANKDD1A
						THSD7B
						ABCB5
						USB1
						SUSD5
						SEMA6D
						SLC5A1
						PRRC2C
						ERAP1
						NUP188
						TNNI1
						SPEN
						SRCIN1
						C5orf51
						DIP2A
						MDN1
						PBRM1
						SIX4
						C2orf69
						KIF3B
						MORC4
						NUAK1
						ATP11C
						SLMAP
						NUDT16
						ZBTB10
						WDR48
						AKAP13
						ZNF516
						RNF2
						UBE2A
						PTPRR
						IMPAD1
						ARIH1
						GTPBP10
						IL6R
						PCNA
						ZNF229
						PCSK1
						RUVBL1
						EEPD1
						HECA
						BBS7
						EIF2S2
						SCAMP1
						DDX46
						APLF
						PIK3CA
						CHCHD7
						PLAGL1
						ROCK2
						MECP2
						CSK
						ARL6IP6
						KAZN
						TXNDC17
						JAKMIP2
						PTGER2
						CREM
						RBL1
						NPR3
						LRRC28
						PLXDC2
						C17orf75
						STMN2
						CCDC88A
						NAP1L2
						ZFR
						KTN1
						BCORL1
						FMNL3
						ZMYND11
						OSBPL8
						RPRD1A
						KIF5C
						PLA2G12A
						USP49
						MSI2
						GSPT1
						TRDMT1
						SH3BP2
						RAB33B
						XPO4
						SLC31A1
						THG1L
						NF1
						CMTM3
						LRRC8C
						RNGTT
						GID4
						RBFOX1
						ABHD17C
						BCR
						TTPA
						IQSEC3
						CACNA1B
						PURG
						NBEA
						PCDHGA12
						MEIS2
						THSD7A
						FBXO11
						SEC63
						MPP6
						PARD6B
						TBC1D8B
						ST6GALNAC3
						PI4KB
						PHF2
						RNF217
						NUFIP2
						FBXW2
						PITPNC1
						KCMF1
						TMED4
						GCA
						ARFRP1
						PLRG1
						USP31
						RAB3C
						PTPN9
						SLC7A11
						ZNF507
						TRIM13
						ZNF276
						ADI1
						KCTD10
						CHML
						CPLX1
						LRRC27
						SYPL1
						CUL3
						RNF149
						OSBP
						TBCCD1
						SRSF7
						DMD
						ERP44
						MSI1
						SPC25
						VSTM4
						PRPF40A
						ALG9
						PLCG2
						LPCAT3
						ENTPD7
						CSRNP2
						CEP63
						VEZT
						LARP4
						IPO9
						GABPB1
						CTSS
						MMAB
						JAG2
						SH3TC2
						TPR
						RPF1
						FUT4
						GPATCH2
						TSPAN3
						CLCN3
						MMP2
						USP24
						ZMYM4
						PTCD3
						TTC28
						HYPK
						USP9X
						ZBTB20
						CHRNA5
						SORBS2
						SPATA22
						DCC
						OR7A5
						NDUFC2-KCTD14
						MCTS1
						USP15
						CLU
						GNRHR
						CRLS1
						HTR5A
						MRPL20
						ZNF334
						MPHOSPH9
						CACNA1A
						CD36

## Sheet: Supplementary Table S8
Supplementary Table S8 - Enriched biological processes associated with the predicted target genes of the differentially expressed miRNAs in the group of men > 40 years.
miRNAs UP							miRNAs DOWN
Category	Term	RT	Count	%	P-Value	Benjamini	Category	Term	RT	Count	%	P-Value	Benjamini
GOTERM_BP_DIRECT	positive regulation of transcription from RNA polymerase II promoter	RT	241	9.8	1.9e-17	1.2e-13	GOTERM_BP_DIRECT	negative regulation of transcription from RNA polymerase II promoter	RT	61	8.1	2.4e-05	0.038
GOTERM_BP_DIRECT	regulation of transcription from RNA polymerase II promoter	RT	301	12.3	2.7e-13	8.6e-10	GOTERM_BP_DIRECT	regulation of transcription from RNA polymerase II promoter	RT	94	12.5	3.1e-05	0.038
GOTERM_BP_DIRECT	negative regulation of transcription from RNA polymerase II promoter	RT	187	7.6	5.7e-12	1.2e-08	GOTERM_BP_DIRECT	negative regulation of transcription, DNA-templated	RT	42	5.6	3.8e-05	0.038
GOTERM_BP_DIRECT	positive regulation of transcription, DNA-templated	RT	145	5.9	9.1e-11	1.5e-07	GOTERM_BP_DIRECT	positive regulation of transcription from RNA polymerase II promoter	RT	70	9.3	7e-05	0.053
GOTERM_BP_DIRECT	neuron projection development	RT	40	1.6	1.8e-08	2.3e-05	GOTERM_BP_DIRECT	Wnt signaling pathway	RT	18	2.4	0.0007	0.43
GOTERM_BP_DIRECT	chromatin remodeling	RT	47	1.9	3.2e-07	0.00034	GOTERM_BP_DIRECT	brain development	RT	22	2.9	0.00084	0.43
GOTERM_BP_DIRECT	protein polyubiquitination	RT	44	1.8	1.2e-06	0.0011	GOTERM_BP_DIRECT	regulation of synaptic vesicle exocytosis	RT	8	1.1	0.0029	1
GOTERM_BP_DIRECT	ubiquitin-dependent protein catabolic process	RT	62	2.5	1.3e-06	0.0011	GOTERM_BP_DIRECT	negative regulation of transforming growth factor beta receptor signaling pathway	RT	11	1.5	0.003	1
GOTERM_BP_DIRECT	axon guidance	RT	45	1.8	2.4e-06	0.0017	GOTERM_BP_DIRECT	synapse assembly	RT	9	1.2	0.0033	1
GOTERM_BP_DIRECT	regulation of circadian rhythm	RT	23	0.9	3.3e-06	0.0021	GOTERM_BP_DIRECT	cell migration	RT	20	2.7	0.004	1
GOTERM_BP_DIRECT	neuron migration	RT	33	1.3	4.7e-06	0.0028	GOTERM_BP_DIRECT	adult behavior	RT	6	0.8	0.0044	1
GOTERM_BP_DIRECT	transcription, DNA-templated	RT	50	2	7.7e-06	0.0042	GOTERM_BP_DIRECT	odontogenesis of dentin-containing tooth	RT	8	1.1	0.0053	1
GOTERM_BP_DIRECT	regulation of cell cycle	RT	66	2.7	1e-05	0.005	GOTERM_BP_DIRECT	neuron projection development	RT	12	1.6	0.0068	1
GOTERM_BP_DIRECT	regulation of transcription, DNA-templated	RT	160	6.5	1.1e-05	0.0052	GOTERM_BP_DIRECT	negative regulation of Rho protein signal transduction	RT	5	0.7	0.0082	1
GOTERM_BP_DIRECT	palate development	RT	22	0.9	1.2e-05	0.0052	GOTERM_BP_DIRECT	anatomical structure development	RT	7	0.9	0.0083	1
GOTERM_BP_DIRECT	embryonic organ development	RT	15	0.6	1.3e-05	0.0052	GOTERM_BP_DIRECT	anterior/posterior axon guidance	RT	3	0.4	0.012	1
GOTERM_BP_DIRECT	protein ubiquitination	RT	91	3.7	1.9e-05	0.0073	GOTERM_BP_DIRECT	positive regulation of cell migration	RT	18	2.4	0.014	1
GOTERM_BP_DIRECT	negative regulation of transcription, DNA-templated	RT	104	4.2	2.4e-05	0.0087	GOTERM_BP_DIRECT	axon guidance	RT	14	1.9	0.014	1
GOTERM_BP_DIRECT	mesoderm formation	RT	14	0.6	4.6e-05	0.016	GOTERM_BP_DIRECT	positive regulation of nuclear-transcribed mRNA catabolic process, deadenylation-dependent decay	RT	4	0.5	0.015	1
GOTERM_BP_DIRECT	protein phosphorylation	RT	90	3.7	4.8e-05	0.016	GOTERM_BP_DIRECT	synaptic membrane adhesion	RT	5	0.7	0.017	1
GOTERM_BP_DIRECT	rhythmic process	RT	23	0.9	5.1e-05	0.016	GOTERM_BP_DIRECT	fibroblast growth factor receptor signaling pathway	RT	7	0.9	0.017	1
GOTERM_BP_DIRECT	epithelial to mesenchymal transition	RT	17	0.7	9.3e-05	0.027	GOTERM_BP_DIRECT	positive regulation of transcription, DNA-templated	RT	38	5.1	0.018	1
GOTERM_BP_DIRECT	odontogenesis of dentin-containing tooth	RT	19	0.8	0.00012	0.034	GOTERM_BP_DIRECT	membrane organization	RT	5	0.7	0.021	1
GOTERM_BP_DIRECT	positive regulation of gene expression	RT	91	3.7	0.00014	0.038	GOTERM_BP_DIRECT	protein polyubiquitination	RT	13	1.7	0.021	1
GOTERM_BP_DIRECT	negative regulation of extrinsic apoptotic signaling pathway	RT	14	0.6	0.00018	0.047	GOTERM_BP_DIRECT	in utero embryonic development	RT	15	2	0.021	1
GOTERM_BP_DIRECT	protein transport	RT	78	3.2	0.0002	0.047	GOTERM_BP_DIRECT	neuron differentiation	RT	13	1.7	0.023	1
GOTERM_BP_DIRECT	corpus callosum development	RT	10	0.4	0.00021	0.047	GOTERM_BP_DIRECT	nervous system development	RT	24	3.2	0.025	1
GOTERM_BP_DIRECT	negative regulation of stem cell proliferation	RT	10	0.4	0.00021	0.047	GOTERM_BP_DIRECT	protein metabolic process	RT	4	0.5	0.025	1
GOTERM_BP_DIRECT	transforming growth factor beta receptor signaling pathway	RT	26	1.1	0.00021	0.047	GOTERM_BP_DIRECT	positive regulation of cell proliferation	RT	30	4	0.025	1
GOTERM_BP_DIRECT	cell migration	RT	53	2.2	0.00024	0.052	GOTERM_BP_DIRECT	neural crest cell migration	RT	6	0.8	0.025	1
GOTERM_BP_DIRECT	cellular response to insulin stimulus	RT	27	1.1	0.0003	0.061	GOTERM_BP_DIRECT	heart development	RT	15	2	0.025	1
GOTERM_BP_DIRECT	outflow tract septum morphogenesis	RT	11	0.4	0.0003	0.061	GOTERM_BP_DIRECT	negative regulation of DNA binding	RT	5	0.7	0.026	1
GOTERM_BP_DIRECT	cell migration involved in sprouting angiogenesis	RT	10	0.4	0.00033	0.064	GOTERM_BP_DIRECT	skeletal muscle cell differentiation	RT	6	0.8	0.027	1
GOTERM_BP_DIRECT	positive regulation of proteasomal ubiquitin-dependent protein catabolic process	RT	22	0.9	0.00033	0.064	GOTERM_BP_DIRECT	negative regulation of translation	RT	8	1.1	0.028	1
GOTERM_BP_DIRECT	cellular response to calcium ion	RT	24	1	0.00038	0.069	GOTERM_BP_DIRECT	Wnt signaling pathway, planar cell polarity pathway	RT	5	0.7	0.029	1
GOTERM_BP_DIRECT	positive regulation of protein serine/threonine kinase activity	RT	20	0.8	0.00041	0.074	GOTERM_BP_DIRECT	regulation of protein localization	RT	8	1.1	0.03	1
GOTERM_BP_DIRECT	negative regulation of transforming growth factor beta receptor signaling pathway	RT	25	1	0.00046	0.08	GOTERM_BP_DIRECT	regulation of translation	RT	8	1.1	0.033	1
GOTERM_BP_DIRECT	protein localization to plasma membrane	RT	35	1.4	0.00047	0.08	GOTERM_BP_DIRECT	negative regulation of stem cell population maintenance	RT	4	0.5	0.037	1
GOTERM_BP_DIRECT	interleukin-6-mediated signaling pathway	RT	8	0.3	0.0005	0.082	GOTERM_BP_DIRECT	lipid biosynthetic process	RT	4	0.5	0.037	1
GOTERM_BP_DIRECT	intracellular signal transduction	RT	78	3.2	0.00053	0.086	GOTERM_BP_DIRECT	regulation of AMPA receptor activity	RT	4	0.5	0.037	1
GOTERM_BP_DIRECT	stem cell proliferation	RT	15	0.6	0.00057	0.088	GOTERM_BP_DIRECT	negative regulation of ERK1 and ERK2 cascade	RT	8	1.1	0.037	1
GOTERM_BP_DIRECT	protein autophosphorylation	RT	38	1.5	0.00058	0.088	GOTERM_BP_DIRECT	RNA phosphodiester bond hydrolysis, exonucleolytic	RT	5	0.7	0.038	1
GOTERM_BP_DIRECT	peptidyl-serine phosphorylation	RT	38	1.5	0.00058	0.088	GOTERM_BP_DIRECT	cerebral cortex radially oriented cell migration	RT	3	0.4	0.039	1
GOTERM_BP_DIRECT	positive regulation of endothelial cell migration	RT	19	0.8	0.00066	0.098	GOTERM_BP_DIRECT	phagosome maturation	RT	3	0.4	0.039	1
GOTERM_BP_DIRECT	commissural neuron axon guidance	RT	7	0.3	0.00071	0.1	GOTERM_BP_DIRECT	nuclear-transcribed mRNA poly(A) tail shortening	RT	4	0.5	0.042	1
GOTERM_BP_DIRECT	regulation of clathrin-dependent endocytosis	RT	7	0.3	0.00071	0.1	GOTERM_BP_DIRECT	positive regulation of dendrite morphogenesis	RT	4	0.5	0.042	1
GOTERM_BP_DIRECT	Wnt signaling pathway	RT	40	1.6	0.00073	0.1	GOTERM_BP_DIRECT	protein targeting to membrane	RT	6	0.8	0.043	1
GOTERM_BP_DIRECT	protein import into nucleus	RT	25	1	0.00083	0.11	GOTERM_BP_DIRECT	apoptotic process	RT	31	4.1	0.044	1
GOTERM_BP_DIRECT	heart development	RT	43	1.8	0.00091	0.12	GOTERM_BP_DIRECT	proteolysis	RT	23	3.1	0.045	1
GOTERM_BP_DIRECT	retina vasculature development in camera-type eye	RT	6	0.2	0.00092	0.12	GOTERM_BP_DIRECT	sodium ion transmembrane transport	RT	9	1.2	0.045	1
GOTERM_BP_DIRECT	skeletal system morphogenesis	RT	12	0.5	0.00094	0.12	GOTERM_BP_DIRECT	positive regulation of cell cycle	RT	5	0.7	0.045	1
GOTERM_BP_DIRECT	positive regulation of osteoclast differentiation	RT	10	0.4	0.0011	0.12	GOTERM_BP_DIRECT	hippocampus development	RT	7	0.9	0.045	1
GOTERM_BP_DIRECT	neuronal stem cell population maintenance	RT	10	0.4	0.0011	0.12	GOTERM_BP_DIRECT	negative regulation of autophagy	RT	6	0.8	0.045	1
GOTERM_BP_DIRECT	filopodium assembly	RT	10	0.4	0.0011	0.12	GOTERM_BP_DIRECT	cell differentiation	RT	34	4.5	0.046	1
GOTERM_BP_DIRECT	in utero embryonic development	RT	42	1.7	0.0011	0.12	GOTERM_BP_DIRECT	aging	RT	13	1.7	0.047	1
GOTERM_BP_DIRECT	nervous system development	RT	71	2.9	0.0011	0.13	GOTERM_BP_DIRECT	protein palmitoylation	RT	4	0.5	0.047	1
GOTERM_BP_DIRECT	positive regulation of osteoblast differentiation	RT	20	0.8	0.0012	0.14	GOTERM_BP_DIRECT	endothelin receptor signaling pathway	RT	3	0.4	0.047	1
GOTERM_BP_DIRECT	multicellular organism growth	RT	22	0.9	0.0013	0.14	GOTERM_BP_DIRECT	netrin-activated signaling pathway	RT	3	0.4	0.047	1
GOTERM_BP_DIRECT	mRNA destabilization	RT	8	0.3	0.0013	0.15	GOTERM_BP_DIRECT	regulation of protein localization to cell surface	RT	3	0.4	0.047	1
GOTERM_BP_DIRECT	positive regulation of tumor necrosis factor production	RT	25	1	0.0015	0.16	GOTERM_BP_DIRECT	positive regulation of cytokine-mediated signaling pathway	RT	3	0.4	0.047	1
GOTERM_BP_DIRECT	membrane organization	RT	11	0.4	0.0016	0.17	GOTERM_BP_DIRECT	multicellular organism development	RT	14	1.9	0.047	1
GOTERM_BP_DIRECT	positive regulation of I-kappaB kinase/NF-kappaB signaling	RT	38	1.5	0.0016	0.17	GOTERM_BP_DIRECT	phosphatidylinositol phosphorylation	RT	6	0.8	0.049	1
GOTERM_BP_DIRECT	regulation of cell adhesion	RT	17	0.7	0.0017	0.18
GOTERM_BP_DIRECT	lung epithelial cell differentiation	RT	6	0.2	0.0019	0.19
GOTERM_BP_DIRECT	osteoclast differentiation	RT	13	0.5	0.002	0.19
GOTERM_BP_DIRECT	endothelial cell proliferation	RT	10	0.4	0.002	0.19
GOTERM_BP_DIRECT	vasculogenesis	RT	17	0.7	0.0021	0.19
GOTERM_BP_DIRECT	regulation of mRNA stability	RT	12	0.5	0.0021	0.19
GOTERM_BP_DIRECT	microtubule cytoskeleton organization	RT	29	1.2	0.0021	0.19
GOTERM_BP_DIRECT	maintenance of permeability of blood-brain barrier	RT	11	0.4	0.0021	0.19
GOTERM_BP_DIRECT	multivesicular body assembly	RT	11	0.4	0.0021	0.19
GOTERM_BP_DIRECT	positive regulation of pri-miRNA transcription from RNA polymerase II promoter	RT	15	0.6	0.0021	0.19
GOTERM_BP_DIRECT	substrate adhesion-dependent cell spreading	RT	16	0.7	0.0023	0.21
GOTERM_BP_DIRECT	regulation of alternative mRNA splicing, via spliceosome	RT	17	0.7	0.0025	0.22
GOTERM_BP_DIRECT	Golgi organization	RT	28	1.1	0.0028	0.24
GOTERM_BP_DIRECT	face morphogenesis	RT	11	0.4	0.0028	0.24
GOTERM_BP_DIRECT	phosphatidylinositol-mediated signaling	RT	14	0.6	0.0029	0.24
GOTERM_BP_DIRECT	angiogenesis	RT	46	1.9	0.0029	0.24
GOTERM_BP_DIRECT	brain development	RT	49	2	0.003	0.24
GOTERM_BP_DIRECT	peptidyl-threonine phosphorylation	RT	18	0.7	0.003	0.24
GOTERM_BP_DIRECT	regulation of synaptic vesicle exocytosis	RT	15	0.6	0.0031	0.24
GOTERM_BP_DIRECT	protein homooligomerization	RT	27	1.1	0.0032	0.24
GOTERM_BP_DIRECT	cellular response to cAMP	RT	16	0.7	0.0033	0.24
GOTERM_BP_DIRECT	RNA splicing	RT	38	1.5	0.0034	0.24
GOTERM_BP_DIRECT	transepithelial transport	RT	6	0.2	0.0034	0.24
GOTERM_BP_DIRECT	negative regulation of sodium ion transmembrane transporter activity	RT	6	0.2	0.0034	0.24
GOTERM_BP_DIRECT	regulation of RNA metabolic process	RT	6	0.2	0.0034	0.24
GOTERM_BP_DIRECT	regulation of neural precursor cell proliferation	RT	6	0.2	0.0034	0.24
GOTERM_BP_DIRECT	ESCRT III complex disassembly	RT	6	0.2	0.0034	0.24
GOTERM_BP_DIRECT	positive regulation of apoptotic process	RT	57	2.3	0.0034	0.24
GOTERM_BP_DIRECT	GTP metabolic process	RT	7	0.3	0.0034	0.24
GOTERM_BP_DIRECT	gamma-aminobutyric acid signaling pathway	RT	10	0.4	0.0036	0.25
GOTERM_BP_DIRECT	MAPK cascade	RT	27	1.1	0.0036	0.25
GOTERM_BP_DIRECT	positive regulation of transcription initiation from RNA polymerase II promoter	RT	15	0.6	0.0038	0.26
GOTERM_BP_DIRECT	branching involved in ureteric bud morphogenesis	RT	13	0.5	0.0039	0.26
GOTERM_BP_DIRECT	neuron projection morphogenesis	RT	17	0.7	0.004	0.27
GOTERM_BP_DIRECT	protein localization	RT	26	1.1	0.0042	0.28
GOTERM_BP_DIRECT	chromatin organization	RT	45	1.8	0.0043	0.28
GOTERM_BP_DIRECT	regulation of ryanodine-sensitive calcium-release channel activity	RT	8	0.3	0.0043	0.28
GOTERM_BP_DIRECT	cellular response to hypoxia	RT	29	1.2	0.0045	0.29
GOTERM_BP_DIRECT	phosphatidylinositol phosphorylation	RT	15	0.6	0.0045	0.29
GOTERM_BP_DIRECT	platelet-derived growth factor receptor signaling pathway	RT	11	0.4	0.0045	0.29
GOTERM_BP_DIRECT	negative regulation of neurogenesis	RT	9	0.4	0.0047	0.29
GOTERM_BP_DIRECT	synaptic transmission, GABAergic	RT	9	0.4	0.0047	0.29
GOTERM_BP_DIRECT	activation of protein kinase activity	RT	19	0.8	0.0047	0.29
GOTERM_BP_DIRECT	ventricular compact myocardium morphogenesis	RT	5	0.2	0.005	0.3
GOTERM_BP_DIRECT	embryonic camera-type eye morphogenesis	RT	7	0.3	0.0051	0.3
GOTERM_BP_DIRECT	postsynaptic actin cytoskeleton organization	RT	7	0.3	0.0051	0.3
GOTERM_BP_DIRECT	negative regulation of cilium assembly	RT	7	0.3	0.0051	0.3
GOTERM_BP_DIRECT	positive regulation of protein catabolic process	RT	21	0.9	0.0051	0.3
GOTERM_BP_DIRECT	proteasome-mediated ubiquitin-dependent protein catabolic process	RT	39	1.6	0.0052	0.3
GOTERM_BP_DIRECT	cellular response to transforming growth factor beta stimulus	RT	17	0.7	0.0055	0.31
GOTERM_BP_DIRECT	negative regulation of epithelial cell proliferation	RT	17	0.7	0.0055	0.31
GOTERM_BP_DIRECT	CRD-mediated mRNA stabilization	RT	6	0.2	0.0056	0.32
GOTERM_BP_DIRECT	negative regulation of apoptotic process	RT	83	3.4	0.0056	0.32
GOTERM_BP_DIRECT	regulation of catalytic activity	RT	62	2.5	0.0059	0.33
GOTERM_BP_DIRECT	ventricular system development	RT	8	0.3	0.0059	0.33
GOTERM_BP_DIRECT	pituitary gland development	RT	10	0.4	0.006	0.33
GOTERM_BP_DIRECT	response to toxic substance	RT	20	0.8	0.006	0.33
GOTERM_BP_DIRECT	response to activity	RT	15	0.6	0.0063	0.33
GOTERM_BP_DIRECT	neuron development	RT	15	0.6	0.0063	0.33
GOTERM_BP_DIRECT	response to glucose	RT	18	0.7	0.0063	0.33
GOTERM_BP_DIRECT	cellular protein localization	RT	16	0.7	0.0063	0.33
GOTERM_BP_DIRECT	negative regulation of BMP signaling pathway	RT	17	0.7	0.0064	0.33
GOTERM_BP_DIRECT	response to amphetamine	RT	12	0.5	0.0064	0.33
GOTERM_BP_DIRECT	regulation of embryonic development	RT	13	0.5	0.0069	0.35
GOTERM_BP_DIRECT	regulation of microtubule cytoskeleton organization	RT	11	0.4	0.007	0.36
GOTERM_BP_DIRECT	fat cell differentiation	RT	18	0.7	0.0072	0.36
GOTERM_BP_DIRECT	post-embryonic development	RT	17	0.7	0.0073	0.36
GOTERM_BP_DIRECT	cellular response to ethanol	RT	7	0.3	0.0074	0.36
GOTERM_BP_DIRECT	autophagosome assembly	RT	16	0.7	0.0074	0.36
GOTERM_BP_DIRECT	negative regulation of gene expression	RT	53	2.2	0.0075	0.37
GOTERM_BP_DIRECT	negative regulation of microtubule depolymerization	RT	10	0.4	0.0076	0.37
GOTERM_BP_DIRECT	cellular response to nerve growth factor stimulus	RT	12	0.5	0.0077	0.37
GOTERM_BP_DIRECT	wound healing	RT	22	0.9	0.008	0.37
GOTERM_BP_DIRECT	cellular response to leukemia inhibitory factor	RT	22	0.9	0.008	0.37
GOTERM_BP_DIRECT	adrenal gland development	RT	9	0.4	0.008	0.37
GOTERM_BP_DIRECT	positive regulation of cardiac muscle cell apoptotic process	RT	8	0.3	0.008	0.37
GOTERM_BP_DIRECT	phosphatidylinositol-3-phosphate biosynthetic process	RT	8	0.3	0.008	0.37
GOTERM_BP_DIRECT	gamete generation	RT	8	0.3	0.008	0.37
GOTERM_BP_DIRECT	activin receptor signaling pathway	RT	8	0.3	0.008	0.37
GOTERM_BP_DIRECT	negative regulation of cell proliferation	RT	73	3	0.008	0.37
GOTERM_BP_DIRECT	negative regulation of neuron projection development	RT	17	0.7	0.0084	0.38
GOTERM_BP_DIRECT	regulation of cell migration	RT	23	0.9	0.0085	0.38
GOTERM_BP_DIRECT	G2/M transition of mitotic cell cycle	RT	15	0.6	0.0086	0.38
GOTERM_BP_DIRECT	ventricular septum morphogenesis	RT	11	0.4	0.0086	0.38
GOTERM_BP_DIRECT	positive regulation of NLRP3 inflammasome complex assembly	RT	6	0.2	0.0087	0.38
GOTERM_BP_DIRECT	late endosome to vacuole transport via multivesicular body sorting pathway	RT	6	0.2	0.0087	0.38
GOTERM_BP_DIRECT	Type I pneumocyte differentiation	RT	5	0.2	0.009	0.39
GOTERM_BP_DIRECT	positive regulation of JNK cascade	RT	21	0.9	0.0094	0.4
GOTERM_BP_DIRECT	signal transduction	RT	177	7.2	0.0095	0.4
GOTERM_BP_DIRECT	embryonic skeletal system development	RT	10	0.4	0.0095	0.4
GOTERM_BP_DIRECT	ER to Golgi vesicle-mediated transport	RT	26	1.1	0.0096	0.41
GOTERM_BP_DIRECT	actin cytoskeleton reorganization	RT	15	0.6	0.0099	0.42
GOTERM_BP_DIRECT	regulation of translation	RT	19	0.8	0.01	0.43
GOTERM_BP_DIRECT	negative regulation of epithelial cell differentiation	RT	7	0.3	0.01	0.43
GOTERM_BP_DIRECT	macromolecular complex assembly	RT	29	1.2	0.01	0.43
GOTERM_BP_DIRECT	response to axon injury	RT	11	0.4	0.011	0.43
GOTERM_BP_DIRECT	viral budding via host ESCRT complex	RT	8	0.3	0.011	0.43
GOTERM_BP_DIRECT	modulation of synaptic transmission	RT	18	0.7	0.011	0.43
GOTERM_BP_DIRECT	cellular response to retinoic acid	RT	17	0.7	0.011	0.44
GOTERM_BP_DIRECT	negative regulation of neuron differentiation	RT	15	0.6	0.011	0.46
GOTERM_BP_DIRECT	positive regulation of cardiac muscle cell proliferation	RT	10	0.4	0.012	0.47
GOTERM_BP_DIRECT	negative regulation of proteasomal protein catabolic process	RT	6	0.2	0.013	0.5
GOTERM_BP_DIRECT	positive regulation of acute inflammatory response	RT	6	0.2	0.013	0.5
GOTERM_BP_DIRECT	positive regulation of neuroblast proliferation	RT	9	0.4	0.013	0.5
GOTERM_BP_DIRECT	BMP signaling pathway	RT	19	0.8	0.013	0.5
GOTERM_BP_DIRECT	mRNA transport	RT	19	0.8	0.013	0.5
GOTERM_BP_DIRECT	positive regulation of stem cell population maintenance	RT	12	0.5	0.013	0.5
GOTERM_BP_DIRECT	response to cytokine	RT	13	0.5	0.013	0.5
GOTERM_BP_DIRECT	anterior/posterior axon guidance	RT	4	0.2	0.013	0.5
GOTERM_BP_DIRECT	regulation of cardiac muscle cell action potential	RT	4	0.2	0.013	0.5
GOTERM_BP_DIRECT	hypoxia-inducible factor-1alpha signaling pathway	RT	4	0.2	0.013	0.5
GOTERM_BP_DIRECT	dorsal root ganglion development	RT	4	0.2	0.013	0.5
GOTERM_BP_DIRECT	positive regulation of peptidyl-lysine acetylation	RT	4	0.2	0.013	0.5
GOTERM_BP_DIRECT	multivesicular body sorting pathway	RT	8	0.3	0.014	0.5
GOTERM_BP_DIRECT	positive regulation of glial cell proliferation	RT	8	0.3	0.014	0.5
GOTERM_BP_DIRECT	positive regulation of peptidyl-tyrosine phosphorylation	RT	20	0.8	0.014	0.5
GOTERM_BP_DIRECT	late endosome to lysosome transport	RT	7	0.3	0.014	0.5
GOTERM_BP_DIRECT	positive regulation of autophagy	RT	17	0.7	0.014	0.51
GOTERM_BP_DIRECT	endothelial cell migration	RT	10	0.4	0.014	0.51
GOTERM_BP_DIRECT	positive regulation of smooth muscle cell proliferation	RT	16	0.7	0.015	0.51
GOTERM_BP_DIRECT	regulation of cell communication by electrical coupling involved in cardiac conduction	RT	5	0.2	0.015	0.51
GOTERM_BP_DIRECT	cellular response to cocaine	RT	5	0.2	0.015	0.51
GOTERM_BP_DIRECT	cerebral cortex radially oriented cell migration	RT	5	0.2	0.015	0.51
GOTERM_BP_DIRECT	negative regulation of organ growth	RT	5	0.2	0.015	0.51
GOTERM_BP_DIRECT	negative regulation of nuclear-transcribed mRNA catabolic process, deadenylation-dependent decay	RT	5	0.2	0.015	0.51
GOTERM_BP_DIRECT	negative regulation of translation	RT	18	0.7	0.015	0.52
GOTERM_BP_DIRECT	positive regulation of cell proliferation	RT	83	3.4	0.015	0.53
GOTERM_BP_DIRECT	phosphatidylinositol biosynthetic process	RT	12	0.5	0.016	0.53
GOTERM_BP_DIRECT	positive regulation of endothelial cell proliferation	RT	17	0.7	0.016	0.54
GOTERM_BP_DIRECT	circadian regulation of gene expression	RT	16	0.7	0.017	0.56
GOTERM_BP_DIRECT	cellular response to xenobiotic stimulus	RT	15	0.6	0.017	0.58
GOTERM_BP_DIRECT	positive regulation of axon extension	RT	10	0.4	0.017	0.58
GOTERM_BP_DIRECT	artery morphogenesis	RT	8	0.3	0.017	0.58
GOTERM_BP_DIRECT	regulation of mitotic spindle assembly	RT	8	0.3	0.017	0.58
GOTERM_BP_DIRECT	cellular response to growth factor stimulus	RT	14	0.6	0.018	0.58
GOTERM_BP_DIRECT	positive regulation of leukocyte adhesion to vascular endothelial cell	RT	6	0.2	0.018	0.58
GOTERM_BP_DIRECT	regulation of cell-matrix adhesion	RT	6	0.2	0.018	0.58
GOTERM_BP_DIRECT	positive regulation of protein binding	RT	17	0.7	0.018	0.58
GOTERM_BP_DIRECT	membrane fission	RT	11	0.4	0.018	0.58
GOTERM_BP_DIRECT	chondrocyte differentiation	RT	13	0.5	0.018	0.58
GOTERM_BP_DIRECT	positive regulation of protein export from nucleus	RT	7	0.3	0.018	0.58
GOTERM_BP_DIRECT	negative regulation of cell migration	RT	33	1.3	0.019	0.59
GOTERM_BP_DIRECT	circadian rhythm	RT	16	0.7	0.019	0.59
GOTERM_BP_DIRECT	positive regulation of peptidyl-threonine phosphorylation	RT	9	0.4	0.02	0.61
GOTERM_BP_DIRECT	heterochromatin assembly	RT	9	0.4	0.02	0.61
GOTERM_BP_DIRECT	neuroblast proliferation	RT	10	0.4	0.021	0.64
GOTERM_BP_DIRECT	cAMP-mediated signaling	RT	10	0.4	0.021	0.64
GOTERM_BP_DIRECT	ureteric bud development	RT	10	0.4	0.021	0.64
GOTERM_BP_DIRECT	cellular response to heat	RT	13	0.5	0.021	0.64
GOTERM_BP_DIRECT	transmembrane receptor protein tyrosine kinase signaling pathway	RT	25	1	0.021	0.64
GOTERM_BP_DIRECT	activation of MAPK activity	RT	16	0.7	0.021	0.64
GOTERM_BP_DIRECT	heart morphogenesis	RT	11	0.4	0.021	0.64
GOTERM_BP_DIRECT	cell morphogenesis	RT	18	0.7	0.021	0.64
GOTERM_BP_DIRECT	positive regulation of GTPase activity	RT	33	1.3	0.021	0.64
GOTERM_BP_DIRECT	protein dephosphorylation	RT	28	1.1	0.022	0.64
GOTERM_BP_DIRECT	regulation of focal adhesion assembly	RT	8	0.3	0.022	0.64
GOTERM_BP_DIRECT	peptidyl-threonine dephosphorylation	RT	8	0.3	0.022	0.64
GOTERM_BP_DIRECT	endosome transport via multivesicular body sorting pathway	RT	5	0.2	0.022	0.64
GOTERM_BP_DIRECT	negative regulation of dendrite morphogenesis	RT	5	0.2	0.022	0.64
GOTERM_BP_DIRECT	netrin-activated signaling pathway	RT	5	0.2	0.022	0.64
GOTERM_BP_DIRECT	positive regulation of circadian rhythm	RT	5	0.2	0.022	0.64
GOTERM_BP_DIRECT	response to transforming growth factor beta	RT	5	0.2	0.022	0.64
GOTERM_BP_DIRECT	morphogenesis of an epithelial sheet	RT	5	0.2	0.022	0.64
GOTERM_BP_DIRECT	histone H4 deacetylation	RT	5	0.2	0.022	0.64
GOTERM_BP_DIRECT	positive regulation of cellular component movement	RT	5	0.2	0.022	0.64
GOTERM_BP_DIRECT	positive regulation of MAP kinase activity	RT	17	0.7	0.022	0.64
GOTERM_BP_DIRECT	response to hypoxia	RT	32	1.3	0.023	0.64
GOTERM_BP_DIRECT	regulation of gene expression	RT	42	1.7	0.023	0.64
GOTERM_BP_DIRECT	cartilage development	RT	14	0.6	0.023	0.64
GOTERM_BP_DIRECT	response to muscle stretch	RT	7	0.3	0.024	0.64
GOTERM_BP_DIRECT	hippo signaling	RT	7	0.3	0.024	0.64
GOTERM_BP_DIRECT	positive regulation of protein ubiquitination involved in ubiquitin-dependent protein catabolic process	RT	7	0.3	0.024	0.64
GOTERM_BP_DIRECT	ubiquitin-dependent protein catabolic process via the multivesicular body sorting pathway	RT	9	0.4	0.024	0.64
GOTERM_BP_DIRECT	response to morphine	RT	9	0.4	0.024	0.64
GOTERM_BP_DIRECT	adult behavior	RT	9	0.4	0.024	0.64
GOTERM_BP_DIRECT	G1/S transition of mitotic cell cycle	RT	16	0.7	0.024	0.64
GOTERM_BP_DIRECT	tumor necrosis factor-mediated signaling pathway	RT	13	0.5	0.024	0.64
GOTERM_BP_DIRECT	embryonic digit morphogenesis	RT	13	0.5	0.024	0.64
GOTERM_BP_DIRECT	pulmonary valve morphogenesis	RT	6	0.2	0.024	0.64
GOTERM_BP_DIRECT	striatum development	RT	6	0.2	0.024	0.64
GOTERM_BP_DIRECT	negative regulation of oxidative stress-induced neuron death	RT	6	0.2	0.024	0.64
GOTERM_BP_DIRECT	programmed cell death	RT	6	0.2	0.024	0.64
GOTERM_BP_DIRECT	calcineurin-NFAT signaling cascade	RT	6	0.2	0.024	0.64
GOTERM_BP_DIRECT	cell-cell adhesion	RT	33	1.3	0.024	0.64
GOTERM_BP_DIRECT	oligodendrocyte differentiation	RT	10	0.4	0.025	0.64
GOTERM_BP_DIRECT	response to progesterone	RT	10	0.4	0.025	0.64
GOTERM_BP_DIRECT	cellular response to gonadotropin stimulus	RT	4	0.2	0.025	0.64
GOTERM_BP_DIRECT	negative regulation of tubulin deacetylation	RT	4	0.2	0.025	0.64
GOTERM_BP_DIRECT	positive regulation of transcription from RNA polymerase II promoter in response to hypoxia	RT	4	0.2	0.025	0.64
GOTERM_BP_DIRECT	energy homeostasis	RT	11	0.4	0.025	0.64
GOTERM_BP_DIRECT	response to xenobiotic stimulus	RT	40	1.6	0.025	0.65
GOTERM_BP_DIRECT	locomotory behavior	RT	18	0.7	0.026	0.67
GOTERM_BP_DIRECT	mRNA processing	RT	37	1.5	0.026	0.67
GOTERM_BP_DIRECT	nucleus organization	RT	8	0.3	0.027	0.67
GOTERM_BP_DIRECT	retina layer formation	RT	8	0.3	0.027	0.67
GOTERM_BP_DIRECT	proximal/distal pattern formation	RT	8	0.3	0.027	0.67
GOTERM_BP_DIRECT	inner ear morphogenesis	RT	13	0.5	0.027	0.68
GOTERM_BP_DIRECT	chloride transmembrane transport	RT	20	0.8	0.028	0.69
GOTERM_BP_DIRECT	protein processing	RT	17	0.7	0.028	0.69
GOTERM_BP_DIRECT	regulation of actin cytoskeleton organization	RT	17	0.7	0.028	0.69
GOTERM_BP_DIRECT	macroautophagy	RT	15	0.6	0.028	0.69
GOTERM_BP_DIRECT	transcription from RNA polymerase II promoter	RT	40	1.6	0.028	0.69
GOTERM_BP_DIRECT	cochlea development	RT	9	0.4	0.028	0.69
GOTERM_BP_DIRECT	positive regulation of filopodium assembly	RT	9	0.4	0.028	0.69
GOTERM_BP_DIRECT	response to calcium ion	RT	14	0.6	0.03	0.72
GOTERM_BP_DIRECT	long term synaptic depression	RT	7	0.3	0.03	0.72
GOTERM_BP_DIRECT	DNA demethylation	RT	7	0.3	0.03	0.72
GOTERM_BP_DIRECT	regulation of centrosome duplication	RT	7	0.3	0.03	0.72
GOTERM_BP_DIRECT	cell adhesion	RT	81	3.3	0.031	0.73
GOTERM_BP_DIRECT	male gonad development	RT	21	0.9	0.031	0.73
GOTERM_BP_DIRECT	mitotic spindle organization	RT	13	0.5	0.031	0.73
GOTERM_BP_DIRECT	Notch signaling pathway	RT	22	0.9	0.031	0.73
GOTERM_BP_DIRECT	axon extension involved in axon guidance	RT	5	0.2	0.032	0.73
GOTERM_BP_DIRECT	vesicle fusion with vacuole	RT	5	0.2	0.032	0.73
GOTERM_BP_DIRECT	multivesicular body-lysosome fusion	RT	5	0.2	0.032	0.73
GOTERM_BP_DIRECT	response to redox state	RT	5	0.2	0.032	0.73
GOTERM_BP_DIRECT	primitive streak formation	RT	5	0.2	0.032	0.73
GOTERM_BP_DIRECT	excitatory postsynaptic potential	RT	18	0.7	0.032	0.73
GOTERM_BP_DIRECT	histone H3 deacetylation	RT	6	0.2	0.032	0.73
GOTERM_BP_DIRECT	hindbrain development	RT	6	0.2	0.032	0.73
GOTERM_BP_DIRECT	positive regulation of cytoplasmic translation	RT	6	0.2	0.032	0.73
GOTERM_BP_DIRECT	positive regulation of pathway-restricted SMAD protein phosphorylation	RT	12	0.5	0.032	0.73
GOTERM_BP_DIRECT	ephrin receptor signaling pathway	RT	12	0.5	0.032	0.73
GOTERM_BP_DIRECT	adherens junction organization	RT	8	0.3	0.033	0.74
GOTERM_BP_DIRECT	negative regulation of MAP kinase activity	RT	11	0.4	0.033	0.75
GOTERM_BP_DIRECT	cellular response to BMP stimulus	RT	9	0.4	0.034	0.75
GOTERM_BP_DIRECT	extrinsic apoptotic signaling pathway via death domain receptors	RT	10	0.4	0.034	0.75
GOTERM_BP_DIRECT	embryonic limb morphogenesis	RT	10	0.4	0.034	0.75
GOTERM_BP_DIRECT	positive regulation of glucose import	RT	10	0.4	0.034	0.75
GOTERM_BP_DIRECT	cell motility	RT	10	0.4	0.034	0.75
GOTERM_BP_DIRECT	positive regulation of translation	RT	17	0.7	0.034	0.75
GOTERM_BP_DIRECT	lung development	RT	18	0.7	0.035	0.77
GOTERM_BP_DIRECT	positive regulation of peptidyl-serine phosphorylation	RT	18	0.7	0.035	0.77
GOTERM_BP_DIRECT	fibroblast growth factor receptor signaling pathway	RT	13	0.5	0.035	0.77
GOTERM_BP_DIRECT	cell division	RT	58	2.4	0.036	0.78
GOTERM_BP_DIRECT	canonical Wnt signaling pathway	RT	19	0.8	0.036	0.78
GOTERM_BP_DIRECT	negative regulation of cell death	RT	16	0.7	0.037	0.78
GOTERM_BP_DIRECT	response to estradiol	RT	21	0.9	0.037	0.78
GOTERM_BP_DIRECT	positive regulation of protein secretion	RT	12	0.5	0.037	0.78
GOTERM_BP_DIRECT	positive regulation of sequence-specific DNA binding transcription factor activity	RT	22	0.9	0.037	0.78
GOTERM_BP_DIRECT	positive regulation of ubiquitin-protein transferase activity	RT	7	0.3	0.037	0.78
GOTERM_BP_DIRECT	regulation of dendrite morphogenesis	RT	7	0.3	0.037	0.78
GOTERM_BP_DIRECT	SMAD protein signal transduction	RT	14	0.6	0.037	0.78
GOTERM_BP_DIRECT	response to insulin	RT	17	0.7	0.038	0.78
GOTERM_BP_DIRECT	positive regulation of cell migration	RT	42	1.7	0.038	0.78
GOTERM_BP_DIRECT	metanephric mesenchyme morphogenesis	RT	3	0.1	0.038	0.78
GOTERM_BP_DIRECT	forebrain astrocyte development	RT	3	0.1	0.038	0.78
GOTERM_BP_DIRECT	positive regulation of cell proliferation by VEGF-activated platelet derived growth factor receptor signaling pathway	RT	3	0.1	0.038	0.78
GOTERM_BP_DIRECT	planar cell polarity pathway involved in axon guidance	RT	3	0.1	0.038	0.78
GOTERM_BP_DIRECT	regulation of retinal ganglion cell axon guidance	RT	3	0.1	0.038	0.78
GOTERM_BP_DIRECT	5-methylcytosine catabolic process	RT	3	0.1	0.038	0.78
GOTERM_BP_DIRECT	positive regulation of B cell proliferation	RT	11	0.4	0.038	0.78
GOTERM_BP_DIRECT	liver development	RT	18	0.7	0.038	0.78
GOTERM_BP_DIRECT	positive regulation of focal adhesion assembly	RT	8	0.3	0.039	0.78
GOTERM_BP_DIRECT	positive regulation of epithelial cell migration	RT	10	0.4	0.039	0.78
GOTERM_BP_DIRECT	positive regulation of axon extension involved in axon guidance	RT	4	0.2	0.039	0.78
GOTERM_BP_DIRECT	regulation of SA node cell action potential	RT	4	0.2	0.039	0.78
GOTERM_BP_DIRECT	oncostatin-M-mediated signaling pathway	RT	4	0.2	0.039	0.78
GOTERM_BP_DIRECT	actin polymerization-dependent cell motility	RT	4	0.2	0.039	0.78
GOTERM_BP_DIRECT	detection of muscle stretch	RT	4	0.2	0.039	0.78
GOTERM_BP_DIRECT	positive regulation of Rac protein signal transduction	RT	4	0.2	0.039	0.78
GOTERM_BP_DIRECT	smoothened signaling pathway involved in dorsal/ventral neural tube patterning	RT	4	0.2	0.039	0.78
GOTERM_BP_DIRECT	regulation of peptidyl-serine phosphorylation	RT	4	0.2	0.039	0.78
GOTERM_BP_DIRECT	establishment of mitotic sister chromatid cohesion	RT	4	0.2	0.039	0.78
GOTERM_BP_DIRECT	PML body organization	RT	4	0.2	0.039	0.78
GOTERM_BP_DIRECT	intrinsic apoptotic signaling pathway	RT	9	0.4	0.04	0.78
GOTERM_BP_DIRECT	adipose tissue development	RT	9	0.4	0.04	0.78
GOTERM_BP_DIRECT	centrosome duplication	RT	6	0.2	0.041	0.79
GOTERM_BP_DIRECT	negative regulation of epithelial cell migration	RT	6	0.2	0.041	0.79
GOTERM_BP_DIRECT	positive regulation of fibroblast migration	RT	6	0.2	0.041	0.79
GOTERM_BP_DIRECT	glutamate receptor signaling pathway	RT	6	0.2	0.041	0.79
GOTERM_BP_DIRECT	DNA damage response, signal transduction by p53 class mediator	RT	6	0.2	0.041	0.79
GOTERM_BP_DIRECT	synaptic vesicle transport	RT	6	0.2	0.041	0.79
GOTERM_BP_DIRECT	negative regulation of fatty acid biosynthetic process	RT	6	0.2	0.041	0.79
GOTERM_BP_DIRECT	gastrulation with mouth forming second	RT	6	0.2	0.041	0.79
GOTERM_BP_DIRECT	ion homeostasis	RT	6	0.2	0.041	0.79
GOTERM_BP_DIRECT	kidney development	RT	22	0.9	0.043	0.82
GOTERM_BP_DIRECT	establishment of endothelial intestinal barrier	RT	5	0.2	0.043	0.82
GOTERM_BP_DIRECT	cardiac myofibril assembly	RT	5	0.2	0.043	0.82
GOTERM_BP_DIRECT	chromatin-mediated maintenance of transcription	RT	5	0.2	0.043	0.82
GOTERM_BP_DIRECT	regulation of BMP signaling pathway	RT	5	0.2	0.043	0.82
GOTERM_BP_DIRECT	cell differentiation	RT	96	3.9	0.043	0.82
GOTERM_BP_DIRECT	regulation of G-protein coupled receptor protein signaling pathway	RT	11	0.4	0.044	0.82
GOTERM_BP_DIRECT	mRNA transcription from RNA polymerase II promoter	RT	11	0.4	0.044	0.82
GOTERM_BP_DIRECT	cell-cell junction organization	RT	7	0.3	0.045	0.84
GOTERM_BP_DIRECT	glycosphingolipid metabolic process	RT	7	0.3	0.045	0.84
GOTERM_BP_DIRECT	negative regulation of sequence-specific DNA binding transcription factor activity	RT	18	0.7	0.046	0.84
GOTERM_BP_DIRECT	positive regulation of protein kinase B signaling	RT	23	0.9	0.046	0.84
GOTERM_BP_DIRECT	heart looping	RT	14	0.6	0.046	0.84
GOTERM_BP_DIRECT	glucose metabolic process	RT	14	0.6	0.046	0.84
GOTERM_BP_DIRECT	cellular response to drug	RT	14	0.6	0.046	0.84
GOTERM_BP_DIRECT	ATP-dependent chromatin remodeling	RT	9	0.4	0.047	0.84
GOTERM_BP_DIRECT	regulation of postsynaptic membrane potential	RT	8	0.3	0.047	0.84
GOTERM_BP_DIRECT	response to gamma radiation	RT	8	0.3	0.047	0.84
GOTERM_BP_DIRECT	negative regulation of osteoclast differentiation	RT	8	0.3	0.047	0.84
GOTERM_BP_DIRECT	somatic stem cell population maintenance	RT	12	0.5	0.047	0.84
GOTERM_BP_DIRECT	regulation of protein phosphorylation	RT	12	0.5	0.047	0.84
GOTERM_BP_DIRECT	cellular response to glucose starvation	RT	12	0.5	0.047	0.84
GOTERM_BP_DIRECT	histone H3 acetylation	RT	12	0.5	0.047	0.84
GOTERM_BP_DIRECT	skeletal system development	RT	24	1	0.049	0.88
GOTERM_BP_DIRECT	regulation of growth	RT	13	0.5	0.049	0.88

## Sheet: Supplementary Table S9
Supplementary Table S9 - Enriched signaling pathways associated with the predicted target genes of the differentially expressed miRNAs in the group of men > 40 years.
miRNAs UP							miRNAs DOWN
Category	Term	RT	Count	%	P-Value	Benjamini	Category	Term	RT	Count	%	P-Value	Benjamini
KEGG_PATHWAY	Axon guidance	RT	54	2.2	3.2e-09	1.1e-06	KEGG_PATHWAY	Axon guidance	RT	16	2.1	0.0046	0.74
KEGG_PATHWAY	Human cytomegalovirus infection	RT	52	2.1	2.5e-05	0.0035	KEGG_PATHWAY	Renal cell carcinoma	RT	9	1.2	0.005	0.74
KEGG_PATHWAY	Signaling pathways regulating pluripotency of stem cells	RT	37	1.5	3.9e-05	0.0035	KEGG_PATHWAY	EGFR tyrosine kinase inhibitor resistance	RT	9	1.2	0.011	0.76
KEGG_PATHWAY	Kaposi sarcoma-associated herpesvirus infection	RT	46	1.9	4.1e-05	0.0035	KEGG_PATHWAY	Insulin signaling pathway	RT	12	1.6	0.017	0.76
KEGG_PATHWAY	Phosphatidylinositol signaling system	RT	28	1.1	5.7e-05	0.0035	KEGG_PATHWAY	Transcriptional misregulation in cancer	RT	15	2	0.018	0.76
KEGG_PATHWAY	Pathways in cancer	RT	99	4	8.2e-05	0.0035	KEGG_PATHWAY	Focal adhesion	RT	15	2	0.024	0.76
KEGG_PATHWAY	Longevity regulating pathway	RT	26	1.1	9e-05	0.0035	KEGG_PATHWAY	Phospholipase D signaling pathway	RT	12	1.6	0.029	0.76
KEGG_PATHWAY	EGFR tyrosine kinase inhibitor resistance	RT	24	1	9.4e-05	0.0035	KEGG_PATHWAY	Bacterial invasion of epithelial cells	RT	8	1.1	0.029	0.76
KEGG_PATHWAY	Dopaminergic synapse	RT	34	1.4	9.4e-05	0.0035	KEGG_PATHWAY	Alcoholism	RT	14	1.9	0.03	0.76
KEGG_PATHWAY	C-type lectin receptor signaling pathway	RT	28	1.1	0.00021	0.0069	KEGG_PATHWAY	Longevity regulating pathway - multiple species	RT	7	0.9	0.032	0.76
KEGG_PATHWAY	TGF-beta signaling pathway	RT	26	1.1	0.00028	0.0085	KEGG_PATHWAY	PI3K-Akt signaling pathway	RT	22	2.9	0.034	0.76
KEGG_PATHWAY	Glioma	RT	22	0.9	0.00034	0.0095	KEGG_PATHWAY	Chemokine signaling pathway	RT	14	1.9	0.036	0.76
KEGG_PATHWAY	Hepatitis B	RT	37	1.5	0.00057	0.015	KEGG_PATHWAY	Pathways in cancer	RT	30	4	0.038	0.76
KEGG_PATHWAY	Cholinergic synapse	RT	28	1.1	0.00085	0.02	KEGG_PATHWAY	Peroxisome	RT	8	1.1	0.039	0.76
KEGG_PATHWAY	Cellular senescence	RT	35	1.4	0.0011	0.025	KEGG_PATHWAY	Ras signaling pathway	RT	16	2.1	0.041	0.76
KEGG_PATHWAY	AMPK signaling pathway	RT	29	1.2	0.0012	0.025	KEGG_PATHWAY	RNA polymerase	RT	5	0.7	0.041	0.76
KEGG_PATHWAY	Osteoclast differentiation	RT	30	1.2	0.0014	0.026	KEGG_PATHWAY	Thyroid hormone signaling pathway	RT	10	1.3	0.045	0.78
KEGG_PATHWAY	Non-small cell lung cancer	RT	20	0.8	0.0014	0.026
KEGG_PATHWAY	Endocytosis	RT	50	2	0.0015	0.026
KEGG_PATHWAY	PD-L1 expression and PD-1 checkpoint pathway in cancer	RT	23	0.9	0.0016	0.026
KEGG_PATHWAY	Inositol phosphate metabolism	RT	20	0.8	0.0017	0.027
KEGG_PATHWAY	Sphingolipid signaling pathway	RT	28	1.1	0.0019	0.03
KEGG_PATHWAY	Proteoglycans in cancer	RT	42	1.7	0.0022	0.03
KEGG_PATHWAY	mTOR signaling pathway	RT	34	1.4	0.0023	0.03
KEGG_PATHWAY	Human immunodeficiency virus 1 infection	RT	43	1.8	0.0024	0.03
KEGG_PATHWAY	Thyroid hormone signaling pathway	RT	28	1.1	0.0025	0.03
KEGG_PATHWAY	Circadian rhythm	RT	12	0.5	0.0025	0.03
KEGG_PATHWAY	Fluid shear stress and atherosclerosis	RT	31	1.3	0.0026	0.03
KEGG_PATHWAY	Inflammatory mediator regulation of TRP channels	RT	24	1	0.0026	0.03
KEGG_PATHWAY	Lipid and atherosclerosis	RT	43	1.8	0.0031	0.035
KEGG_PATHWAY	Autophagy - animal	RT	31	1.3	0.0032	0.035
KEGG_PATHWAY	Oxytocin signaling pathway	RT	33	1.3	0.0035	0.036
KEGG_PATHWAY	Ubiquitin mediated proteolysis	RT	31	1.3	0.0036	0.036
KEGG_PATHWAY	Insulin resistance	RT	25	1	0.0045	0.043
KEGG_PATHWAY	Leukocyte transendothelial migration	RT	26	1.1	0.0045	0.043
KEGG_PATHWAY	Hippo signaling pathway	RT	33	1.3	0.0048	0.045
KEGG_PATHWAY	Fc gamma R-mediated phagocytosis	RT	23	0.9	0.0049	0.045
KEGG_PATHWAY	Wnt signaling pathway	RT	35	1.4	0.005	0.045
KEGG_PATHWAY	Colorectal cancer	RT	21	0.9	0.0053	0.045
KEGG_PATHWAY	Endometrial cancer	RT	16	0.7	0.0053	0.045
KEGG_PATHWAY	T cell receptor signaling pathway	RT	24	1	0.0056	0.046
KEGG_PATHWAY	GnRH secretion	RT	17	0.7	0.0058	0.046
KEGG_PATHWAY	Chronic myeloid leukemia	RT	19	0.8	0.0065	0.051
KEGG_PATHWAY	B cell receptor signaling pathway	RT	20	0.8	0.0067	0.052
KEGG_PATHWAY	Bacterial invasion of epithelial cells	RT	19	0.8	0.0075	0.056
KEGG_PATHWAY	Yersinia infection	RT	29	1.2	0.0077	0.056
KEGG_PATHWAY	Neurotrophin signaling pathway	RT	26	1.1	0.008	0.057
KEGG_PATHWAY	Hippo signaling pathway - multiple species	RT	10	0.4	0.0083	0.057
KEGG_PATHWAY	Melanoma	RT	18	0.7	0.0083	0.057
KEGG_PATHWAY	MAPK signaling pathway	RT	53	2.2	0.009	0.061
KEGG_PATHWAY	ErbB signaling pathway	RT	20	0.8	0.01	0.066
KEGG_PATHWAY	Rap1 signaling pathway	RT	40	1.6	0.01	0.066
KEGG_PATHWAY	Breast cancer	RT	30	1.2	0.011	0.07
KEGG_PATHWAY	Relaxin signaling pathway	RT	27	1.1	0.012	0.074
KEGG_PATHWAY	Prolactin signaling pathway	RT	17	0.7	0.014	0.086
KEGG_PATHWAY	AGE-RAGE signaling pathway in diabetic complications	RT	22	0.9	0.014	0.086
KEGG_PATHWAY	VEGF signaling pathway	RT	15	0.6	0.015	0.089
KEGG_PATHWAY	Melanogenesis	RT	22	0.9	0.016	0.093
KEGG_PATHWAY	Leishmaniasis	RT	18	0.7	0.016	0.093
KEGG_PATHWAY	PI3K-Akt signaling pathway	RT	60	2.4	0.019	0.11
KEGG_PATHWAY	mRNA surveillance pathway	RT	21	0.9	0.02	0.11
KEGG_PATHWAY	Circadian entrainment	RT	21	0.9	0.02	0.11
KEGG_PATHWAY	Morphine addiction	RT	20	0.8	0.02	0.11
KEGG_PATHWAY	Long-term potentiation	RT	16	0.7	0.02	0.11
KEGG_PATHWAY	Choline metabolism in cancer	RT	21	0.9	0.022	0.11
KEGG_PATHWAY	Small cell lung cancer	RT	20	0.8	0.023	0.11
KEGG_PATHWAY	Th1 and Th2 cell differentiation	RT	20	0.8	0.023	0.11
KEGG_PATHWAY	Renal cell carcinoma	RT	16	0.7	0.026	0.13
KEGG_PATHWAY	Amphetamine addiction	RT	16	0.7	0.026	0.13
KEGG_PATHWAY	Central carbon metabolism in cancer	RT	16	0.7	0.03	0.14
KEGG_PATHWAY	Growth hormone synthesis, secretion and action	RT	24	1	0.03	0.14
KEGG_PATHWAY	GABAergic synapse	RT	19	0.8	0.032	0.15
KEGG_PATHWAY	Th17 cell differentiation	RT	22	0.9	0.032	0.15
KEGG_PATHWAY	Chagas disease	RT	21	0.9	0.033	0.15
KEGG_PATHWAY	HIF-1 signaling pathway	RT	22	0.9	0.035	0.16
KEGG_PATHWAY	Human T-cell leukemia virus 1 infection	RT	39	1.6	0.037	0.16
KEGG_PATHWAY	Prostate cancer	RT	20	0.8	0.037	0.16
KEGG_PATHWAY	Gastric cancer	RT	28	1.1	0.038	0.17
KEGG_PATHWAY	Endocrine resistance	RT	20	0.8	0.041	0.17
KEGG_PATHWAY	Aldosterone synthesis and secretion	RT	20	0.8	0.041	0.17
KEGG_PATHWAY	TNF signaling pathway	RT	22	0.9	0.045	0.19
KEGG_PATHWAY	Parathyroid hormone synthesis, secretion and action	RT	21	0.9	0.047	0.19
KEGG_PATHWAY	Shigellosis	RT	42	1.7	0.048	0.19
KEGG_PATHWAY	Longevity regulating pathway - multiple species	RT	14	0.6	0.048	0.19
KEGG_PATHWAY	Apelin signaling pathway	RT	26	1.1	0.048	0.19
